# Supplementary material for: Multi-Omics Analysis Reveals That SlERF.D6 Synergistically Regulates SGAs and Fruit Development
Source: Front Plant Sci. 2022 Apr 8;13:860577. doi: 10.3389/fpls.2022.860577 (PMC9024245; doi:10.3389/fpls.2022.860577)
Supplement: Supplementary file 2 [file Table_1.XLSX]

## Sheet: Supplementary Table 1
Supplementary Table 1. The characteristic statistics of all identified SlAP2/ERF properties.
Gene ID	Gene Name	Size（aa）	MW(Da)	pI	Predicted Subcellular location	Chromosome No.	number of AP2	number of B3	intron_num	intron total length	Famliy
Solyc01g096860	SlAP2-001	443	50617.1	5.15	Nuclear	1	2	0	2	1700	AP2
Solyc02g064960	SlAP2-002	504	57299.2	8.51	Nuclear	2	2	0	9	1455	AP2
Solyc02g092050	SlAP2-003	646	72002.3	6.62	Nuclear	2	2	0	8	1264	AP2
Solyc02g093150	SlAP2-004	562	63438.8	6.55	Nuclear	2	2	0	9	987	AP2
Solyc03g044300	SlAP2-005	401	44944.5	7.68	Nuclear	3	2	0	8	2987	AP2
Solyc03g117720	SlAP2-006	371	42093.8	6.77	Nuclear	3	2	0	7	3086	AP2
Solyc03g123430	SlAP2-007	513	56903.8	5.33	Nuclear	3	2	0	7	2212	AP2
Solyc04g009450	SlAP2-008	599	67227	9.11	Nuclear	4	3	0	0	0	AP2
Solyc04g077490	SlAP2-009	652	71579.4	6.99	Nuclear	4	2	0	8	1147	AP2
Solyc05g051380	SlAP2-010	501	55822.3	6.2	Nuclear	5	2	0	7	2705	AP2
Solyc06g066390	SlAP2-011	405	46380	9.29	Nuclear	6	1	0	6	542	AP2
Solyc06g068570	SlAP2-012	315	36346.3	6.53	Nuclear	6	2	0	5	4327	AP2
Solyc06g075510	SlAP2-013	474	52534.1	7.65	Nuclear	6	1	0	15	6658	AP2
Solyc07g018290	SlAP2-014	468	52373.7	8.34	Nuclear	7	2	0	8	2782	AP2
Solyc08g081650	SlAP2-015	908	102470	6.87	Nuclear	8	5	0	0	0	AP2
Solyc08g081670	SlAP2-016	341	38351	8.57	Nuclear	8	2	0	3	1200	AP2
Solyc10g084340	SlAP2-017	462	51081.2	6.06	Nuclear	10	2	0	9	1767	AP2
Solyc11g008560	SlAP2-018	677	75240.2	6.27	Nuclear	11	2	0	8	2968	AP2
Solyc11g010710	SlAP2-019	543	59744.6	6.13	Nuclear	11	2	0	8	3824	AP2
Solyc11g061750	SlAP2-020	548	60739.4	6.1	Nuclear	11	2	0	8	2124	AP2
Solyc12g010490	SlAP2-021	364	41139.7	7.13	Chloroplast	12	2	0	5	1584	AP2
Solyc01g008890	SlAP2-022	303	34801.8	9.6	Cytoplasmic	1	2	0	4	6135	AP2
Solyc04g049800	SlAP2-023	398	44003.2	8.93	Nuclear	4	2	0	8	1183	AP2
Solyc09g007260	SlAP2-024	455	49933.6	6.61	Nuclear	9	2	0	9	1337	AP2
Solyc11g072600	SlAP2-025	481	53069.1	6.65	Nuclear	11	2	0	8	1445	AP2
Solyc08g076380	SlAP2-026	521	59944.9	9.52	Nuclear	8	2	0	9	860	AP2
Solyc08g078180	SlERF.A1	234	26454.6	5.47	Nuclear	8	1	0	0	0	ERF
Solyc03g093610	SlERF.A2	242	26760.4	7.68	Nuclear	3	1	0	0	0	ERF
Solyc05g052050	SlERF.A3	234	26089.5	8.73	Nuclear	5	1	0	0	0	ERF
Solyc08g078170	SlERF.A4	237	26768.6	5.05	Nuclear	8	1	0	0	0	ERF
Solyc08g007230	SlERF.A5	199	22153	6.77	Nuclear	8	1	0	1	42	ERF
Solyc05g052040	SlERF.B1	365	41514.7	9.01	Nuclear	5	1	0	0	0	ERF
Solyc01g090370	SlERF.B10	221	25554.5	6.92	Nuclear	1	1	0	1	257	ERF
Solyc05g050790	SlERF.B11	189	21960.9	9.83	Nuclear	5	1	0	2	481	ERF
Solyc09g066350	SlERF.B12	156	17764.4	7.08	Nuclear	9	1	0	0	0	ERF
Solyc08g078190	SlERF.B13	322	36263.7	6.1	Nuclear	8	1	0	0	0	ERF
Solyc03g005510	SlERF.B14	175	20073.6	9.06	Chloroplast	3	1	0	0	0	ERF
Solyc09g089920	SlERF.B15	152	17170.2	9.15	Nuclear	9	1	0	0	0	ERF
Solyc03g093530	SlERF.B16	118	13197.6	8.76	Nuclear	3	1	0	2	811	ERF
Solyc03g093560	SlERF.B2	244	27706.4	7.75	Nuclear	3	1	0	0	0	ERF
Solyc05g052030	SlERF.B3	201	22599.1	7.74	Nuclear	5	1	0	0	0	ERF
Solyc03g093540	SlERF.B4	228	25870.1	6.46	Nuclear	3	1	0	0	0	ERF
Solyc03g093550	SlERF.B5	241	27465.3	9.07	Nuclear	3	1	0	0	0	ERF
Solyc01g090300	SlERF.B6	202	22735.5	7.8	Nuclear	1	1	0	0	0	ERF
Solyc01g090310	SlERF.B7	180	20417.7	7.88	Nuclear	1	1	0	0	0	ERF
Solyc01g090320	SlERF.B8	186	21442.4	9.87	Nuclear	1	1	0	0	0	ERF
Solyc01g090340	SlERF.B9	219	24464.5	5.37	Nuclear	1	1	0	0	0	ERF
Solyc05g051200	SlERF.C1	224	25528.5	5.3	Nuclear	5	1	0	0	0	ERF
Solyc03g005520	SlERF.C10	211	24000.7	5.62	Nuclear	3	1	0	0	0	ERF
Solyc03g005500	SlERF.C11	129	14822.2	6.51	Nuclear	3	1	0	0	0	ERF
Solyc05g051180	SlERF.C12	210	23943.2	5.89	Nuclear	5	1	0	1	119	ERF
Solyc09g066340	SlERF.C13	131	14858.5	6.83	Nuclear	9	1	0	0	0	ERF
Solyc09g089910	SlERF.C14	143	16158.8	5.77	Nuclear	9	1	0	0	0	ERF
Solyc10g054915	SlERF.C15	161	18741	9.93	Nuclear	10	1	0	4	338	ERF
Solyc04g014530	SlERF.C2	233	26781.7	7.77	Nuclear	4	1	0	0	0	ERF
Solyc09g066360	SlERF.C3	193	22289	5.29	Nuclear	9	1	0	0	0	ERF
Solyc09g089930	SlERF.C4	240	27030.8	4.98	Nuclear	9	1	0	0	0	ERF
Solyc02g077360	SlERF.C5	258	30015.5	4.96	Nuclear	2	1	0	0	0	ERF
Solyc02g077370	SlERF.C6	345	39050.1	8.81	Nuclear	2	1	0	0	0	ERF
Solyc11g011740	SlERF.C7	176	19900.2	6.19	Nuclear	11	1	0	0	0	ERF
Solyc11g011750	SlERF.C8	166	18908.5	6.34	Nuclear	11	1	0	0	0	ERF
Solyc11g006050	SlERF.C9	199	22541.8	4.83	Nuclear	11	1	0	0	0	ERF
Solyc04g051360	SlERF.D1	303	33804.1	6.5	Nuclear	4	1	0	1	378	ERF
Solyc12g056590	SlERF.D2	310	33760.9	7.81	Nuclear	12	1	0	2	842	ERF
Solyc01g108240	SlERF.D3	295	32668.8	5.82	Nuclear	1	1	0	0	0	ERF
Solyc10g050970	SlERF.D4	223	25080.2	8.95	Nuclear	10	1	0	0	0	ERF
Solyc04g012050	SlERF.D5	398	44575	5.6	Nuclear	4	1	0	1	1322	ERF
Solyc04g071770	SlERF.D6	452	49582.8	6.11	Nuclear	4	1	0	1	297	ERF
Solyc03g118190	SlERF.D7	244	27597	5.84	Nuclear	3	1	0	1	126	ERF
Solyc12g042210	SlERF.D8	287	33337.5	6.9	Nuclear	12	1	0	1	461	ERF
Solyc06g068830	SlERF.D9	289	33183.3	8.89	Nuclear	6	1	0	2	328	ERF
Solyc09g075420	SlERF.E1	260	29638.1	5	Cytoplasmic	9	1	0	1	75	ERF
Solyc06g063070	SlERF.E2	372	41477.8	5.04	Nuclear	6	1	0	1	995	ERF
Solyc03g123500	SlERF.E3	386	42870.2	5.04	Nuclear	3	1	0	2	939	ERF
Solyc01g065980	SlERF.E4	254	28286.5	5.74	Nuclear	1	1	0	3	8453	ERF
Solyc12g049560	SlERF.E5	386	42701.2	5	Nuclear	12	1	0	2	1153	ERF
Solyc10g006130	SlERF.F1	221	24390.3	8.95	Chloroplast	10	1	0	0	0	ERF
Solyc02g077840	SlERF.F10	154	16983.5	9.81	Nuclear	2	1	0	0	0	ERF
Solyc04g072300	SlERF.F11	160	18225.5	6.91	Mitochondrial	4	1	0	0	0	ERF
Solyc11g045680	SlERF.F12	291	33182.8	5.52	Nuclear	11	1	0	1	67	ERF
Solyc11g045690	SlERF.F13	302	34736.5	5.7	Nuclear	11	1	0	2	372	ERF
Solyc12g038440	SlERF.F14	81	9474.53	5.59	Nuclear	12	1	0	0	0	ERF
Solyc12g038450	SlERF.F15	93	10491.9	9.79	Nuclear	12	1	0	0	0	ERF
Solyc01g096865	SlERF.F16	96	11332.9	8.76	Nuclear	1	1	0	2	501	ERF
Solyc02g030210	SlERF.F17	351	39637	6.11	Nuclear	2	1	0	9	15016	ERF
Solyc02g077810	SlERF.F18	181	20266.1	9.33	Chloroplast	2	1	0	0	0	ERF
Solyc07g064890	SlERF.F2	240	26357.2	7.73	Nuclear	7	1	0	0	0	ERF
Solyc07g049490	SlERF.F3	268	29938	5.07	Nuclear	7	1	0	2	4207	ERF
Solyc07g053740	SlERF.F4	373	40352.9	6.51	Nuclear	7	1	0	0	0	ERF
Solyc10g009110	SlERF.F5	222	24239.4	8.87	Chloroplast	10	1	0	0	0	ERF
Solyc12g005960	SlERF.F6	193	21271.8	8.64	Nuclear	12	1	0	1	1957	ERF
Solyc03g006320	SlERF.F7	216	22442.3	9.04	Chloroplast	3	1	0	0	0	ERF
Solyc01g067540	SlERF.F8	321	36162.5	5.16	Nuclear	1	1	0	0	0	ERF
Solyc05g013540	SlERF.F9	386	42534	7.6	Nuclear	5	1	0	0	0	ERF
Solyc01g095500	SlERF.G1	293	33751.1	5.35	Nuclear	1	1	0	0	0	ERF
Solyc06g082590	SlERF.G2	248	27912.9	4.96	Cytoplasmic	6	1	0	0	0	ERF
Solyc03g007460	SlERF.G3	396	43452.1	4.57	Nuclear	3	1	0	1	145	ERF
Solyc06g051840	SlERF.G4	350	39354.6	4.85	Nuclear	6	1	0	0	0	ERF
Solyc08g081960	SlERF.G5	339	37706.7	5.24	Nuclear	8	1	0	0	0	ERF
Solyc06g065820	SlERF.H1	204	23243.7	8.96	Mitochondrial	6	1	0	1	437	ERF
Solyc04g054910	SlERF.H10	278	31052.5	5.5	Nuclear	4	1	0	3	317	ERF
Solyc12g056980	SlERF.H11	307	33663.7	7.81	Nuclear	12	1	0	1	91	ERF
Solyc04g072900	SlERF.H12	264	29534.2	6.67	Nuclear	4	1	0	0	0	ERF
Solyc12g013660	SlERF.H13	353	40581.5	8.7	Nuclear	12	1	0	1	298	ERF
Solyc05g052410	SlERF.H14	399	44712.3	4.61	Nuclear	5	1	0	1	3166	ERF
Solyc06g050520	SlERF.H15	300	33301.4	4.9	Nuclear	6	1	0	1	70	ERF
Solyc01g014720	SlERF.H17	174	19845.5	9.54	Cytoplasmic	1	1	0	1	315	ERF
Solyc01g091760	SlERF.H18	291	32393.4	7.1	Nuclear	1	1	0	0	0	ERF
Solyc02g067020	SlERF.H19	300	34110.2	5.6	Nuclear	2	1	0	0	0	ERF
Solyc06g068360	SlERF.H2	181	20841.4	6.97	Nuclear	6	1	0	1	104	ERF
Solyc01g005630	SlERF.H20	234	27062.8	5.77	Nuclear	1	1	0	1	132	ERF
Solyc01g008880	SlERF.H21	199	22876.4	9.78	Nuclear	1	1	0	0	0	ERF
Solyc01g009440	SlERF.H22	210	23844.8	5.37	Nuclear	1	1	0	0	0	ERF
Solyc01g014537	SlERF.H23	212	24155.8	9.52	Cytoplasmic	1	1	0	4	464	ERF
Solyc01g014562	SlERF.H24	130	14853.1	9.96	Nuclear	1	1	0	0	0	ERF
Solyc01g014566	SlERF.H25	88	10074.5	9.88	Nuclear	1	1	0	0	0	ERF
Solyc01g014623	SlERF.H26	101	11584.7	10.05	Nuclear	1	1	0	3	218	ERF
Solyc01g057080	SlERF.H27	113	12352	9.41	Nuclear	1	1	0	0	0	ERF
Solyc01g150003	SlERF.H28	103	11681	6.06	Cytoplasmic	1	1	0	1	133	ERF
Solyc02g093130	SlERF.H29	133	15000.8	6.08	Nuclear	2	1	0	0	0	ERF
Solyc03g116610	SlERF.H3	202	22742.7	8.76	Nuclear	3	1	0	1	120	ERF
Solyc03g026270	SlERF.H30	205	23061	5.48	Nuclear	3	1	0	0	0	ERF
Solyc03g026280	SlERF.H31	210	23397.3	5.23	Nuclear	3	1	0	0	0	ERF
Solyc03g114440	SlERF.H32	179	20349	9.37	Chloroplast	3	1	0	0	0	ERF
Solyc03g117130	SlERF.H33	162	18646.8	6.34	Nuclear	3	1	0	1	226	ERF
Solyc03g117230	SlERF.H34	252	28405.4	9.68	Nuclear	3	1	0	0	0	ERF
Solyc03g119800	SlERF.H35	340	37390.5	5.25	Nuclear	3	1	0	1	112	ERF
Solyc03g124110	SlERF.H36	220	24597.7	5.33	Nuclear	3	1	0	0	0	ERF
Solyc04g050750	SlERF.H37	161	17949	5.58	Nuclear	4	1	0	0	0	ERF
Solyc04g078640	SlERF.H38	148	16912	9.03	Nuclear	4	1	0	1	292	ERF
Solyc04g080910	SlERF.H39	248	27020.7	4.77	Nuclear	4	1	0	0	0	ERF
Solyc01g090560	SlERF.H4	274	30485.6	6.14	Nuclear	1	1	0	0	0	ERF
Solyc06g035700	SlERF.H40	178	19263.4	4.82	Nuclear	6	1	0	0	0	ERF
Solyc06g053240	SlERF.H41	200	22663.7	7.01	Nuclear	6	1	0	1	149	ERF
Solyc06g054630	SlERF.H42	237	26630	5	Nuclear	6	1	0	1	6494	ERF
Solyc07g054220	SlERF.H43	390	44437.9	5.39	Nuclear	7	1	0	0	0	ERF
Solyc08g007820	SlERF.H44	244	27407.7	4.91	Nuclear	8	1	0	0	0	ERF
Solyc08g007830	SlERF.H45	229	26020.8	4.99	Nuclear	8	1	0	0	0	ERF
Solyc08g007840	SlERF.H46	202	22403.8	4.83	Nuclear	8	1	0	1	218	ERF
Solyc08g008305	SlERF.H47	334	37723.3	5.8	Nuclear	8	1	0	0	0	ERF
Solyc08g078410	SlERF.H48	147	16297.4	6.3	Nuclear	8	1	0	0	0	ERF
Solyc08g078420	SlERF.H49	147	16340.4	6.2	Nuclear	8	1	0	0	0	ERF
Solyc08g080290	SlERF.H50	264	28391.9	5.53	Nuclear	8	1	0	1	285	ERF
Solyc08g082210	SlERF.H51	264	30143.2	9.41	Nuclear	8	1	0	1	76	ERF
Solyc09g009240	SlERF.H52	202	22078.9	5.93	Chloroplast	9	1	0	0	0	ERF
Solyc09g091950	SlERF.H53	419	46946.4	8.48	Nuclear	9	1	0	1	373	ERF
Solyc10g076370	SlERF.H54	356	41540.6	4.73	Nuclear	10	1	0	2	274	ERF
Solyc10g076380	SlERF.H55	323	36429.3	4.09	Nuclear	10	1	0	0	0	ERF
Solyc10g078610	SlERF.H56	291	33206.1	6.72	Nuclear	10	1	0	0	0	ERF
Solyc10g080310	SlERF.H57	73	8382.6	10.08	Nuclear	10	1	0	2	422	ERF
Solyc10g080650	SlERF.H58	249	27999.5	9.42	Nuclear	10	1	0	1	41	ERF
Solyc10g083560	SlERF.H59	197	21165.4	5.02	Chloroplast	10	1	0	0	0	ERF
Solyc03g120840	SlERF.H6	249	27145.2	6	Nuclear	3	1	0	0	0	ERF
Solyc11g012980	SlERF.H60	219	24387.1	5.71	Chloroplast	11	1	0	0	0	ERF
Solyc11g042560	SlERF.H61	173	19894.4	5.81	Nuclear	11	1	0	0	0	ERF
Solyc11g042580	SlERF.H62	163	18308.3	5.58	Nuclear	11	1	0	0	0	ERF
Solyc12g008350	SlERF.H63	299	32994.6	4.91	Nuclear	12	1	0	0	0	ERF
Solyc12g009240	SlERF.H64	248	27838.7	4.61	Nuclear	12	1	0	0	0	ERF
Solyc12g009490	SlERF.H65	221	25087.7	8.75	Nuclear	12	1	0	2	1722	ERF
Solyc12g044390	SlERF.H66	143	16152.4	9.26	Nuclear	12	1	0	0	0	ERF
Solyc12g056430	SlERF.H67	203	22987.8	5.68	Nuclear	12	1	0	0	0	ERF
Solyc06g066540	SlERF.H7	192	21472.1	4.99	Nuclear	6	1	0	0	0	ERF
Solyc08g066660	SlERF.H8	218	23916.7	5.75	Nuclear	8	1	0	0	0	ERF
Solyc07g042230	SlERF.H9	167	18769.2	8.43	Nuclear	7	1	0	0	0	ERF
Solyc02g090770	SlERF.J1	529	60143.9	8.54	Nuclear	2	1	0	0	0	ERF
Solyc02g090790	SlERF.J2	227	25375.3	6.37	Nuclear	2	1	0	0	0	ERF
Solyc05g009450	SlERF.J3	341	38031.1	4.75	Nuclear	5	1	0	1	1570	ERF
Solyc01g014564	SlERF.J4	61	7204.52	10.07	Nuclear	1	1	0	1	106	ERF
Solyc01g014715	SlERF.J5	97	11277.5	5.2	Cytoplasmic	1	1	0	1	561	ERF
Solyc02g090800	SlERF.J6	131	15067	8.56	Nuclear	2	1	0	0	0	ERF
Solyc03g119580	SlERF.J7	385	43278.9	5.3	Nuclear	3	1	0	0	0	ERF
Solyc04g007170	SlERF.J8	350	39206.7	4.9	Nuclear	4	1	0	1	213	ERF
Solyc04g007000	SlRAV-001	372	42221.9	9.15	Nuclear	4	1	1	0	0	RAV
Solyc05g009790	SlRAV-002	395	44382.3	9.35	Nuclear	5	1	1	0	0	RAV
Solyc03g083110	SlRAV-003	335	38721.5	6.17	Nuclear	3	1	1	1	827	RAV
Solyc09g059510	Soloist	191	22001.5	6.03	Nuclear	9	1	0	6	4665	Soloist
