# Supplementary material for: Multi-Omics Analysis Reveals That SlERF.D6 Synergistically Regulates SGAs and Fruit Development
Source: Front Plant Sci. 2022 Apr 8;13:860577. doi: 10.3389/fpls.2022.860577 (PMC9024245; doi:10.3389/fpls.2022.860577)
Supplement: Supplementary file 4 [file Table_3.XLSX]

## Sheet: Tomato and A.thaliana
Supplementary Table 3. The collinearity analysis results between tomato and other plants.
Sl Chr	Sl Gene Name		At Chr	At Gene Name
sl1	Solyc01g090370	==	at2	AT2G44840
sl1	Solyc01g090560	==	at2	AT2G44940
sl1	Solyc01g095500	==	at2	AT2G46310
sl1	Solyc01g065980	==	at3	AT3G16770
sl1	Solyc01g090560	==	at3	AT3G60490
sl1	Solyc01g095500	==	at3	AT3G61630
sl1	Solyc01g095500	==	at4	AT4G23750
sl1	Solyc01g095500	==	at5	AT5G53290
sl1	Solyc01g067540	==	at5	AT5G18560
sl2	Solyc02g077840	==	at1	AT1G28360
sl2	Solyc02g077840	==	at1	AT1G53170
sl2	Solyc02g093130	==	at2	AT2G23340
sl2	Solyc02g093130	==	at3	AT3G50260
sl2	Solyc02g077840	==	at3	AT3G15210
sl2	Solyc02g092050	==	at4	AT4G37750
sl2	Solyc02g077360	==	at4	AT4G18450
sl2	Solyc02g064960	==	at4	AT4G36920
sl2	Solyc02g093130	==	at4	AT4G36900
sl2	Solyc02g093150	==	at4	AT4G36920
sl2	Solyc02g064960	==	at5	AT5G67180
sl2	Solyc02g093150	==	at5	AT5G67180
sl2	Solyc02g093130	==	at5	AT5G67190
sl2	Solyc02g090770	==	at5	AT5G67000
sl2	Solyc02g090800	==	at5	AT5G67010
sl3	Solyc03g005500	==	at1	AT1G04370
sl3	Solyc03g117720	==	at1	AT1G16060
sl3	Solyc03g119580	==	at1	AT1G68550
sl3	Solyc03g119580	==	at1	AT1G49120
sl3	Solyc03g119580	==	at1	AT1G25470
sl3	Solyc03g117230	==	at1	AT1G80580
sl3	Solyc03g116610	==	at1	AT1G15360
sl3	Solyc03g006320	==	at1	AT1G28360
sl3	Solyc03g123500	==	at1	AT1G53910
sl3	Solyc03g117720	==	at1	AT1G79700
sl3	Solyc03g120840	==	at3	AT3G16280
sl3	Solyc03g005500	==	at3	AT3G23220
sl3	Solyc03g005520	==	at3	AT3G23240
sl3	Solyc03g007460	==	at4	AT4G27950
sl3	Solyc03g026270	==	at4	AT4G25470
sl3	Solyc03g044300	==	at4	AT4G36920
sl3	Solyc03g118190	==	at5	AT5G07310
sl3	Solyc03g005500	==	at5	AT5G43410
sl3	Solyc03g044300	==	at5	AT5G67180
sl3	Solyc03g026270	==	at5	AT5G51990
sl3	Solyc03g120840	==	at5	AT5G25810
sl3	Solyc03g007460	==	at5	AT5G53290
sl3	Solyc03g118190	==	at5	AT5G61890
sl3	Solyc03g093540	==	at5	AT5G61590
sl3	Solyc03g093540	==	at5	AT5G07580
sl4	Solyc04g054910	==	at1	AT1G78080
sl4	Solyc04g078640	==	at1	AT1G44830
sl4	Solyc04g072900	==	at1	AT1G22190
sl4	Solyc04g072900	==	at1	AT1G78080
sl4	Solyc04g080910	==	at1	AT1G75490
sl4	Solyc04g072900	==	at1	AT1G36060
sl4	Solyc04g007180	==	at1	AT1G68550
sl4	Solyc04g007000	==	at1	AT1G25560
sl4	Solyc04g007000	==	at1	AT1G13260
sl4	Solyc04g007000	==	at1	AT1G68840
sl4	Solyc04g078640	==	at1	AT1G46768
sl4	Solyc04g078640	==	at2	AT2G23340
sl4	Solyc04g078640	==	at3	AT3G50260
sl4	Solyc04g007000	==	at3	AT3G25730
sl4	Solyc04g007180	==	at3	AT3G25890
sl4	Solyc04g054910	==	at4	AT4G39780
sl4	Solyc04g077490	==	at4	AT4G37750
sl4	Solyc04g072900	==	at4	AT4G39780
sl4	Solyc04g072900	==	at5	AT5G65130
sl4	Solyc04g078640	==	at5	AT5G67190
sl4	Solyc04g051360	==	at5	AT5G64750
sl4	Solyc04g054910	==	at5	AT5G65130
sl5	Solyc05g009450	==	at1	AT1G68550
sl5	Solyc05g013540	==	at1	AT1G12980
sl5	Solyc05g009450	==	at1	AT1G25470
sl5	Solyc05g009790	==	at1	AT1G25560
sl5	Solyc05g009790	==	at1	AT1G13260
sl5	Solyc05g009790	==	at1	AT1G68840
sl5	Solyc05g013540	==	at1	AT1G24590
sl5	Solyc05g052410	==	at2	AT2G40340
sl5	Solyc05g050830	==	at2	AT2G44940
sl5	Solyc05g052410	==	at3	AT3G11020
sl5	Solyc05g050830	==	at3	AT3G60490
sl5	Solyc05g009790	==	at3	AT3G25730
sl5	Solyc05g009450	==	at3	AT3G25890
sl5	Solyc05g051380	==	at5	AT5G10510
sl5	Solyc05g052410	==	at5	AT5G05410
sl5	Solyc05g051380	==	at5	AT5G65510
sl6	Solyc06g066390	==	at1	AT1G79700
sl6	Solyc06g063070	==	at1	AT1G72360
sl6	Solyc06g063070	==	at1	AT1G53910
sl6	Solyc06g068570	==	at1	AT1G16060
sl6	Solyc06g050520	==	at2	AT2G40220
sl6	Solyc06g050520	==	at2	AT2G40340
sl6	Solyc06g075510	==	at2	AT2G28550
sl6	Solyc06g063070	==	at3	AT3G14230
sl6	Solyc06g050520	==	at3	AT3G11020
sl6	Solyc06g066540	==	at3	AT3G16280
sl6	Solyc06g051840	==	at4	AT4G27950
sl6	Solyc06g068830	==	at5	AT5G07310
sl6	Solyc06g075510	==	at5	AT5G60120
sl6	Solyc06g068360	==	at5	AT5G25190
sl6	Solyc06g051840	==	at5	AT5G53290
sl6	Solyc06g065820	==	at5	AT5G25190
sl6	Solyc06g068830	==	at5	AT5G61890
sl6	Solyc06g050520	==	at5	AT5G05410
sl6	Solyc06g035700	==	at5	AT5G52020
sl7	Solyc07g064890	==	at1	AT1G50640
sl7	Solyc07g042230	==	at1	AT1G19210
sl7	Solyc07g053740	==	at3	AT3G15210
sl7	Solyc07g064890	==	at3	AT3G20310
sl7	Solyc07g054220	==	at4	AT4G28140
sl7	Solyc07g053740	==	at5	AT5G44210
sl8	Solyc08g082210	==	at1	AT1G64380
sl8	Solyc08g080290	==	at1	AT1G12630
sl8	Solyc08g007820	==	at1	AT1G12610
sl8	Solyc08g078420	==	at2	AT2G35700
sl8	Solyc08g081960	==	at2	AT2G46310
sl8	Solyc08g081960	==	at3	AT3G61630
sl8	Solyc08g081960	==	at4	AT4G11140
sl8	Solyc08g007230	==	at4	AT4G17500
sl8	Solyc08g078190	==	at4	AT4G17490
sl8	Solyc08g078170	==	at4	AT4G17500
sl8	Solyc08g081960	==	at4	AT4G23750
sl8	Solyc08g078170	==	at5	AT5G47220
sl8	Solyc08g078190	==	at5	AT5G47230
sl8	Solyc08g007230	==	at5	AT5G47220
sl8	Solyc08g080290	==	at5	AT5G52020
sl8	Solyc08g066660	==	at5	AT5G25810
sl8	Solyc08g081960	==	at5	AT5G53290
sl9	Solyc09g089920	==	at1	AT1G04370
sl9	Solyc09g009240	==	at2	AT2G36450
sl9	Solyc09g007260	==	at2	AT2G39250
sl9	Solyc09g075420	==	at2	AT2G47520
sl9	Solyc09g089920	==	at3	AT3G23220
sl9	Solyc09g089930	==	at3	AT3G23240
sl9	Solyc09g007260	==	at3	AT3G54990
sl9	Solyc09g091950	==	at4	AT4G13620
sl9	Solyc09g089920	==	at5	AT5G43410
sl9	Solyc09g007260	==	at5	AT5G60120
sl10	Solyc10g006130	==	at1	AT1G50640
sl10	Solyc10g009110	==	at1	AT1G28360
sl10	Solyc10g083560	==	at2	AT2G36450
sl10	Solyc10g076370	==	at2	AT2G38340
sl10	Solyc10g076370	==	at2	AT2G40340
sl10	Solyc10g006130	==	at3	AT3G20310
sl10	Solyc10g080310	==	at3	AT3G57600
sl10	Solyc10g084340	==	at3	AT3G54990
sl10	Solyc10g076370	==	at5	AT5G05410
sl11	Solyc11g012980	==	at1	AT1G21910
sl11	Solyc11g012980	==	at1	AT1G77640
sl11	Solyc11g042580	==	at1	AT1G71450
sl11	Solyc11g072600	==	at2	AT2G28550
sl11	Solyc11g061750	==	at3	AT3G20840
sl11	Solyc11g010710	==	at5	AT5G65510
sl11	Solyc11g010710	==	at5	AT5G10510
sl11	Solyc11g072600	==	at5	AT5G60120
sl12	Solyc12g056980	==	at1	AT1G78080
sl12	Solyc12g056980	==	at1	AT1G22190
sl12	Solyc12g049560	==	at1	AT1G72360
sl12	Solyc12g009240	==	at1	AT1G19210
sl12	Solyc12g056430	==	at1	AT1G63030
sl12	Solyc12g049560	==	at3	AT3G14230
sl12	Solyc12g044390	==	at3	AT3G16280
sl12	Solyc12g008350	==	at4	AT4G32800
sl12	Solyc12g042210	==	at5	AT5G61890

## Sheet: Tomato and V.vinifera
Supplementary Table 3. The collinearity analysis results between tomato and other plants.
Sl Chr	Sl Gene Name		Vv Chr	Vv Gene Name
Sl5	Solyc05g013540	==	Vv00	VIT_00s0291g00030
Sl4	Solyc04g077490	==	Vv00	VIT_00s0772g00020
Sl4	Solyc04g007000	==	Vv01	VIT_01s0011g03070
Sl5	Solyc05g009790	==	Vv01	VIT_01s0011g03070
Sl3	Solyc03g119580	==	Vv01	VIT_01s0011g03470
Sl4	Solyc04g007170	==	Vv01	VIT_01s0011g03470
Sl5	Solyc05g009450	==	Vv01	VIT_01s0011g03470
Sl3	Solyc03g118190	==	Vv01	VIT_01s0150g00120
Sl6	Solyc06g068830	==	Vv01	VIT_01s0150g00120
Sl8	Solyc08g082210	==	Vv02	VIT_02s0025g01360
Sl8	Solyc08g008305	==	Vv02	VIT_02s0025g01360
Sl3	Solyc03g026270	==	Vv02	VIT_02s0025g04440
Sl8	Solyc08g080290	==	Vv02	VIT_02s0025g04440
Sl8	Solyc08g007820	==	Vv02	VIT_02s0025g04440
Sl12	Solyc12g056430	==	Vv02	VIT_02s0025g04440
Sl1	Solyc01g108240	==	Vv03	VIT_03s0063g00460
Sl2	Solyc02g090770	==	Vv03	VIT_03s0063g00460
Sl10	Solyc10g050970	==	Vv03	VIT_03s0063g00460
Sl7	Solyc07g042230	==	Vv04	VIT_04s0008g02230
Sl8	Solyc08g066660	==	Vv04	VIT_04s0008g03400
Sl3	Solyc03g116610	==	Vv04	VIT_04s0008g05440
Sl12	Solyc12g009490	==	Vv04	VIT_04s0008g05440
Sl3	Solyc03g117130	==	Vv04	VIT_04s0008g06000
Sl6	Solyc06g065820	==	Vv04	VIT_04s0008g06000
Sl6	Solyc06g068360	==	Vv04	VIT_04s0008g06000
Sl3	Solyc03g005500	==	Vv05	VIT_05s0049g00490
Sl9	Solyc09g089910	==	Vv05	VIT_05s0049g00490
Sl1	Solyc01g065980	==	Vv05	VIT_05s0077g01860
Sl9	Solyc09g075420	==	Vv05	VIT_05s0077g01860
Sl1	Solyc01g005630	==	Vv06	VIT_06s0004g00490
Sl11	Solyc11g061750	==	Vv06	VIT_06s0004g01800
Sl9	Solyc09g007260	==	Vv06	VIT_06s0004g03590
Sl10	Solyc10g084340	==	Vv06	VIT_06s0004g03590
Sl11	Solyc11g072600	==	Vv06	VIT_06s0004g03590
Sl6	Solyc06g082590	==	Vv06	VIT_06s0004g08190
Sl9	Solyc09g009240	==	Vv06	VIT_06s0061g01390
Sl10	Solyc10g083560	==	Vv06	VIT_06s0061g01390
Sl1	Solyc01g065980	==	Vv07	VIT_07s0005g00820
Sl9	Solyc09g075420	==	Vv07	VIT_07s0005g00820
Sl3	Solyc03g005500	==	Vv07	VIT_07s0005g03190
Sl9	Solyc09g089910	==	Vv07	VIT_07s0005g03190
Sl9	Solyc09g066340	==	Vv07	VIT_07s0005g03190
Sl9	Solyc09g089920	==	Vv07	VIT_07s0005g03280
Sl2	Solyc02g093130	==	Vv07	VIT_07s0031g00190
Sl4	Solyc04g078640	==	Vv07	VIT_07s0031g00190
Sl2	Solyc02g093150	==	Vv07	VIT_07s0031g00220
Sl3	Solyc03g044300	==	Vv07	VIT_07s0031g00220
Sl1	Solyc01g108240	==	Vv07	VIT_07s0031g00710
Sl2	Solyc02g090800	==	Vv07	VIT_07s0031g00720
Sl4	Solyc04g051360	==	Vv07	VIT_07s0031g01980
Sl4	Solyc04g071770	==	Vv07	VIT_07s0031g01980
Sl12	Solyc12g056590	==	Vv07	VIT_07s0031g01980
Sl9	Solyc09g009240	==	Vv08	VIT_08s0007g03790
Sl10	Solyc10g083560	==	Vv08	VIT_08s0007g03790
Sl1	Solyc01g005630	==	Vv08	VIT_08s0007g07250
Sl10	Solyc10g080650	==	Vv08	VIT_08s0007g07250
Sl10	Solyc10g078610	==	Vv08	VIT_08s0007g07250
Sl10	Solyc10g080310	==	Vv08	VIT_08s0007g08150
Sl10	Solyc10g084340	==	Vv08	VIT_08s0040g03180
Sl5	Solyc05g052410	==	Vv08	VIT_08s0058g00520
Sl6	Solyc06g050520	==	Vv08	VIT_08s0058g00520
Sl10	Solyc10g076380	==	Vv08	VIT_08s0058g00520
Sl3	Solyc03g123500	==	Vv09	VIT_09s0002g00470
Sl3	Solyc03g123500	==	Vv09	VIT_09s0002g00470
Sl6	Solyc06g063070	==	Vv09	VIT_09s0002g00470
Sl12	Solyc12g049560	==	Vv09	VIT_09s0002g00470
Sl3	Solyc03g123430	==	Vv09	VIT_09s0002g01370
Sl3	Solyc03g120840	==	Vv09	VIT_09s0002g03940
Sl6	Solyc06g066540	==	Vv09	VIT_09s0002g03940
Sl8	Solyc08g066660	==	Vv09	VIT_09s0002g03940
Sl12	Solyc12g044390	==	Vv09	VIT_09s0002g03940
Sl12	Solyc12g008350	==	Vv09	VIT_09s0002g03940
Sl3	Solyc03g116610	==	Vv09	VIT_09s0002g06750
Sl3	Solyc03g117230	==	Vv09	VIT_09s0002g08830
Sl3	Solyc03g117720	==	Vv09	VIT_09s0018g01650
Sl6	Solyc06g068570	==	Vv09	VIT_09s0018g01650
Sl2	Solyc02g077840	==	Vv10	VIT_10s0003g00130
Sl3	Solyc03g006320	==	Vv10	VIT_10s0003g00130
Sl7	Solyc07g053740	==	Vv10	VIT_10s0003g00130
Sl2	Solyc02g077360	==	Vv10	VIT_10s0003g00580
Sl6	Solyc06g063070	==	Vv11	VIT_11s0016g00660
Sl7	Solyc07g042230	==	Vv11	VIT_11s0016g00660
Sl12	Solyc12g009240	==	Vv11	VIT_11s0016g00660
Sl3	Solyc03g120840	==	Vv11	VIT_11s0016g03350
Sl6	Solyc06g066540	==	Vv11	VIT_11s0016g03350
Sl8	Solyc08g066660	==	Vv11	VIT_11s0016g03350
Sl12	Solyc12g008350	==	Vv11	VIT_11s0016g03350
Sl12	Solyc12g044390	==	Vv11	VIT_11s0016g03350
Sl3	Solyc03g116610	==	Vv11	VIT_11s0016g05340
Sl12	Solyc12g009490	==	Vv11	VIT_11s0016g05340
Sl12	Solyc12g010490	==	Vv11	VIT_11s0037g00870
Sl7	Solyc07g018290	==	Vv11	VIT_11s0052g00840
Sl2	Solyc02g077840	==	Vv12	VIT_12s0028g03270
Sl7	Solyc07g053740	==	Vv12	VIT_12s0028g03270
Sl7	Solyc07g049490	==	Vv12	VIT_12s0059g01460
Sl4	Solyc04g049800	==	Vv13	VIT_13s0019g03550
Sl9	Solyc09g007260	==	Vv13	VIT_13s0019g03550
Sl1	Solyc01g096860	==	Vv13	VIT_13s0047g00340
Sl5	Solyc05g052410	==	Vv13	VIT_13s0067g01400
Sl5	Solyc05g052410	==	Vv13	VIT_13s0067g01960
Sl6	Solyc06g050520	==	Vv13	VIT_13s0067g01960
Sl10	Solyc10g076370	==	Vv13	VIT_13s0067g01960
Sl6	Solyc06g068830	==	Vv14	VIT_14s0068g01040
Sl10	Solyc10g054915	==	Vv14	VIT_14s0081g00730
Sl11	Solyc11g006050	==	Vv14	VIT_14s0081g00730
Sl5	Solyc05g009790	==	Vv14	VIT_14s0083g00130
Sl2	Solyc02g067020	==	Vv14	VIT_14s0108g01220
Sl1	Solyc01g090300	==	Vv15	VIT_15s0021g01590
Sl8	Solyc08g078170	==	Vv15	VIT_15s0021g01590
Sl1	Solyc01g090560	==	Vv15	VIT_15s0021g02110
Sl8	Solyc08g078410	==	Vv15	VIT_15s0021g02110
Sl1	Solyc01g095500	==	Vv15	VIT_15s0046g01390
Sl3	Solyc03g007460	==	Vv15	VIT_15s0046g01390
Sl8	Solyc08g081960	==	Vv15	VIT_15s0046g01390
Sl3	Solyc03g093540	==	Vv16	VIT_16s0013g00890
Sl3	Solyc03g093530	==	Vv16	VIT_16s0013g00950
Sl3	Solyc03g007460	==	Vv16	VIT_16s0050g02400
Sl8	Solyc08g081960	==	Vv16	VIT_16s0050g02400
Sl3	Solyc03g026270	==	Vv16	VIT_16s0100g00380
Sl6	Solyc06g035700	==	Vv16	VIT_16s0100g00380
Sl8	Solyc08g080290	==	Vv16	VIT_16s0100g00380
Sl3	Solyc03g118190	==	Vv17	VIT_17s0000g00200
Sl6	Solyc06g068830	==	Vv17	VIT_17s0000g00200
Sl12	Solyc12g042210	==	Vv17	VIT_17s0000g00200
Sl3	Solyc03g114440	==	Vv17	VIT_17s0000g04480
Sl11	Solyc11g012980	==	Vv18	VIT_18s0001g03240
Sl4	Solyc04g072900	==	Vv18	VIT_18s0001g05250
Sl4	Solyc04g054910	==	Vv18	VIT_18s0001g05250
Sl12	Solyc12g056980	==	Vv18	VIT_18s0001g05250
Sl11	Solyc11g042580	==	Vv18	VIT_18s0001g05850
Sl2	Solyc02g092050	==	Vv18	VIT_18s0001g08610
Sl4	Solyc04g077490	==	Vv18	VIT_18s0001g08610
Sl2	Solyc02g093130	==	Vv18	VIT_18s0001g10150
Sl4	Solyc04g078640	==	Vv18	VIT_18s0001g10150
Sl4	Solyc04g080910	==	Vv18	VIT_18s0001g13320
Sl4	Solyc04g071770	==	Vv18	VIT_18s0072g00260
Sl4	Solyc04g051360	==	Vv18	VIT_18s0072g00260
Sl12	Solyc12g056590	==	Vv18	VIT_18s0072g00260
Sl2	Solyc02g077840	==	Vv19	VIT_19s0014g02240
Sl7	Solyc07g053740	==	Vv19	VIT_19s0014g02240
Sl7	Solyc07g054220	==	Vv19	VIT_19s0014g03180
Sl12	Solyc12g013660	==	Vv19	VIT_19s0014g03180
Sl7	Solyc07g064890	==	Vv19	VIT_19s0090g01080
Sl7	Solyc07g049490	==	Vv19	VIT_19s0090g01080
Sl10	Solyc10g006130	==	Vv19	VIT_19s0090g01080

## Sheet: Tomato and O.sativa
Supplementary Table 3. The collinearity analysis results between tomato and other plants.
Os Chr	Os Gene Name		Sl Chr	Sl Gene Name
os1	LOC_Os01g54890	==	sl2	Solyc02g077370
os1	LOC_Os01g12440	==	sl3	Solyc03g007460
os1	LOC_Os01g46870	==	sl8	Solyc08g081960
os1	LOC_Os01g46870	==	sl1	Solyc01g095500
os2	LOC_Os02g52670	==	sl2	Solyc02g090770
os2	LOC_Os02g45420	==	sl3	Solyc03g026280
os2	LOC_Os02g43790	==	sl3	Solyc03g093610
os2	LOC_Os02g43820	==	sl3	Solyc03g093540
os2	LOC_Os02g55380	==	sl3	Solyc03g117130
os2	LOC_Os02g51670	==	sl4	Solyc04g054910
os2	LOC_Os02g38090	==	sl5	Solyc05g013540
os2	LOC_Os02g51670	==	sl4	Solyc04g072900
os2	LOC_Os02g43790	==	sl8	Solyc08g078170
os2	LOC_Os02g43820	==	sl8	Solyc08g078190
os2	LOC_Os02g43970	==	sl8	Solyc08g078420
os2	LOC_Os02g13710	==	sl8	Solyc08g066660
os2	LOC_Os02g54050	==	sl7	Solyc07g042230
os2	LOC_Os02g45420	==	sl8	Solyc08g080290
os2	LOC_Os02g43940	==	sl1	Solyc01g090560
os2	LOC_Os02g51670	==	sl12	Solyc12g056980
os3	LOC_Os03g05590	==	sl9	Solyc09g066350
os3	LOC_Os03g05590	==	sl3	Solyc03g005500
os3	LOC_Os03g12950	==	sl4	Solyc04g077490
os3	LOC_Os03g56050	==	sl2	Solyc02g092050
os3	LOC_Os03g08460	==	sl12	Solyc12g049560
os3	LOC_Os03g12950	==	sl2	Solyc02g092050
os3	LOC_Os03g56050	==	sl4	Solyc04g077490
os3	LOC_Os03g09170	==	sl4	Solyc04g072900
os4	LOC_Os04g48350	==	sl3	Solyc03g026270
os4	LOC_Os04g46400	==	sl1	Solyc01g090560
os4	LOC_Os04g48330	==	sl8	Solyc08g080290
os4	LOC_Os04g46220	==	sl8	Solyc08g078170
os4	LOC_Os04g46240	==	sl8	Solyc08g078190
os4	LOC_Os04g46410	==	sl8	Solyc08g078410
os4	LOC_Os04g46440	==	sl8	Solyc08g078420
os4	LOC_Os04g46220	==	sl8	Solyc08g007230
os4	LOC_Os04g32620	==	sl3	Solyc03g118190
os4	LOC_Os04g46220	==	sl3	Solyc03g093610
os4	LOC_Os04g46240	==	sl3	Solyc03g093550
os5	LOC_Os05g49010	==	sl2	Solyc02g077360
os6	LOC_Os06g08340	==	sl3	Solyc03g117130
os6	LOC_Os06g09390	==	sl3	Solyc03g123500
os6	LOC_Os06g11860	==	sl4	Solyc04g072900
os6	LOC_Os06g11860	==	sl4	Solyc04g054910
os7	LOC_Os07g42510	==	sl6	Solyc06g063070
os7	LOC_Os07g47330	==	sl1	Solyc01g067540
os7	LOC_Os07g42510	==	sl12	Solyc12g049560
os8	LOC_Os08g43200	==	sl3	Solyc03g026270
os8	LOC_Os08g31580	==	sl4	Solyc04g072900
os8	LOC_Os08g36920	==	sl2	Solyc02g090770
os8	LOC_Os08g31580	==	sl4	Solyc04g054910
os9	LOC_Os09g35010	==	sl3	Solyc03g026270
os9	LOC_Os09g28440	==	sl2	Solyc02g090770
os9	LOC_Os09g26420	==	sl6	Solyc06g063070
os9	LOC_Os09g20350	==	sl4	Solyc04g054910
os9	LOC_Os09g20350	==	sl4	Solyc04g072900
os9	LOC_Os09g28440	==	sl1	Solyc01g108240
os10	LOC_Os10g41130	==	sl1	Solyc01g090560
os10	LOC_Os10g38000	==	sl3	Solyc03g026270
os10	LOC_Os10g41330	==	sl3	Solyc03g093540
os10	LOC_Os10g41330	==	sl8	Solyc08g078190

## Sheet: Tomato and B.distachyon
Supplementary Table 3. The collinearity analysis results between tomato and other plants.
Sl Chr	Sl Gene Name		Bd Chr	Bd Gene Name
sl1	Solyc01g067540	==	bd1	BRADI_1g18580v3
sl1	Solyc01g090300	==	bd3	BRADI_3g50490v3
sl1	Solyc01g090300	==	bd5	BRADI_5g17480v3
sl1	Solyc01g090560	==	bd3	BRADI_3g50620v3
sl1	Solyc01g090560	==	bd3	BRADI_3g33355v3
sl1	Solyc01g090560	==	bd5	BRADI_5g17610v3
sl1	Solyc01g091760	==	bd4	BRADI_4g35655v3
sl1	Solyc01g095500	==	bd2	BRADI_2g45530v3
sl2	Solyc02g077360	==	bd2	BRADI_2g50035v3
sl2	Solyc02g077360	==	bd2	BRADI_2g16442v3
sl2	Solyc02g090770	==	bd3	BRADI_3g38140v3
sl2	Solyc02g090770	==	bd3	BRADI_3g58015v3
sl2	Solyc02g092050	==	bd1	BRADI_1g69209v3
sl3	Solyc03g007460	==	bd2	BRADI_2g07357v3
sl3	Solyc03g026270	==	bd3	BRADI_3g31600v3
sl3	Solyc03g026280	==	bd3	BRADI_3g51610v3
sl3	Solyc03g026280	==	bd4	BRADI_4g35650v3
sl3	Solyc03g026280	==	bd5	BRADI_5g18850v3
sl3	Solyc03g093530	==	bd3	BRADI_3g50490v3
sl3	Solyc03g093530	==	bd5	BRADI_5g17480v3
sl3	Solyc03g120840	==	bd1	BRADI_1g38110v3
sl3	Solyc03g120840	==	bd3	BRADI_3g08790v3
sl3	Solyc03g123430	==	bd1	BRADI_1g72890v3
sl4	Solyc04g054910	==	bd1	BRADI_1g45470v3
sl4	Solyc04g054910	==	bd3	BRADI_3g35560v3
sl4	Solyc04g054910	==	bd3	BRADI_3g58980v3
sl4	Solyc04g054910	==	bd4	BRADI_4g29010v3
sl4	Solyc04g071770	==	bd2	BRADI_2g56145v3
sl4	Solyc04g071770	==	bd2	BRADI_2g24175v3
sl4	Solyc04g071770	==	bd4	BRADI_4g41616v3
sl4	Solyc04g071770	==	bd5	BRADI_5g10107v3
sl4	Solyc04g072900	==	bd1	BRADI_1g71740v3
sl4	Solyc04g072900	==	bd1	BRADI_1g45470v3
sl4	Solyc04g072900	==	bd3	BRADI_3g35560v3
sl4	Solyc04g072900	==	bd3	BRADI_3g58980v3
sl4	Solyc04g072900	==	bd4	BRADI_4g29010v3
sl4	Solyc04g077490	==	bd1	BRADI_1g69209v3
sl4	Solyc04g077490	==	bd1	BRADI_1g07290v3
sl4	Solyc04g078640	==	bd3	BRADI_3g57862v3
sl5	Solyc05g013540	==	bd3	BRADI_3g47610v3
sl5	Solyc05g052410	==	bd2	BRADI_2g22505v3
sl6	Solyc06g035700	==	bd3	BRADI_3g51610v3
sl6	Solyc06g063070	==	bd1	BRADI_1g46690v3
sl6	Solyc06g063070	==	bd4	BRADI_4g31040v3
sl7	Solyc07g018290	==	bd5	BRADI_5g24360v3
sl7	Solyc07g042230	==	bd3	BRADI_3g56801v3
sl8	Solyc08g007820	==	bd3	BRADI_3g51630v3
sl8	Solyc08g007840	==	bd3	BRADI_3g51610v3
sl8	Solyc08g007840	==	bd5	BRADI_5g18850v3
sl8	Solyc08g078170	==	bd3	BRADI_3g50490v3
sl8	Solyc08g078170	==	bd5	BRADI_5g17480v3
sl8	Solyc08g078410	==	bd3	BRADI_3g50620v3
sl8	Solyc08g078410	==	bd3	BRADI_3g33355v3
sl8	Solyc08g078410	==	bd5	BRADI_5g17610v3
sl8	Solyc08g080290	==	bd3	BRADI_3g51610v3
sl8	Solyc08g080290	==	bd5	BRADI_5g18850v3
sl8	Solyc08g081960	==	bd2	BRADI_2g45530v3
sl9	Solyc09g007260	==	bd2	BRADI_2g37800v3
sl9	Solyc09g066340	==	bd1	BRADI_1g75040v3
sl9	Solyc09g075420	==	bd1	BRADI_1g17961v3
sl9	Solyc09g089910	==	bd1	BRADI_1g75040v3
sl10	Solyc10g076370	==	bd2	BRADI_2g22505v3
sl11	Solyc11g012980	==	bd3	BRADI_3g57862v3
sl12	Solyc12g008350	==	bd1	BRADI_1g38110v3
sl12	Solyc12g049560	==	bd1	BRADI_1g72449v3
sl12	Solyc12g056430	==	bd3	BRADI_3g51630v3
sl12	Solyc12g056980	==	bd3	BRADI_3g58980v3

## Sheet: Collinearity of tomato
Supplementary Table 3. The collinearity analysis results between tomato and other plants.
Gene ID	Gene ID	Duplication Type
Solyc01g008880	Solyc01g008890	Tandem duplication
Solyc01g090300	Solyc01g090310	Tandem duplication
Solyc01g090310	Solyc01g090320	Tandem duplication
Solyc01g090320	Solyc01g090340	Tandem duplication
Solyc02g077360	Solyc02g077370	Tandem duplication
Solyc02g090790	Solyc02g090800	Tandem duplication
Solyc03g005500	Solyc03g005510	Tandem duplication
Solyc03g005510	Solyc03g005520	Tandem duplication
Solyc03g026270	Solyc03g026280	Tandem duplication
Solyc03g026280	Solyc03g124110	Tandem duplication
Solyc03g093540	Solyc03g093550	Tandem duplication
Solyc03g093550	Solyc03g093560	Tandem duplication
Solyc03g093560	Solyc03g093610	Tandem duplication
Solyc05g052030	Solyc05g052040	Tandem duplication
Solyc05g052040	Solyc05g052050	Tandem duplication
Solyc08g007820	Solyc08g007830	Tandem duplication
Solyc08g007830	Solyc08g007840	Tandem duplication
Solyc08g078170	Solyc08g078180	Tandem duplication
Solyc08g078180	Solyc08g078190	Tandem duplication
Solyc08g078410	Solyc08g078420	Tandem duplication
Solyc09g066340	Solyc09g066350	Tandem duplication
Solyc09g066350	Solyc09g066360	Tandem duplication
Solyc09g089910	Solyc09g089920	Tandem duplication
Solyc09g089920	Solyc09g089930	Tandem duplication
Solyc10g076370	Solyc10g076380	Tandem duplication
Solyc11g011740	Solyc11g011750	Tandem duplication
Solyc11g042580	Solyc11g042560	Tandem duplication
Solyc12g038440	Solyc12g038450	Tandem duplication
Gene ID	Gene ID	Duplication Type
Solyc01g014562	Solyc01g014566	Segmental duplication
Solyc01g095500	Solyc03g007460	Segmental duplication
Solyc01g095500	Solyc08g081960	Segmental duplication
Solyc01g090300	Solyc08g078170	Segmental duplication
Solyc01g090340	Solyc08g078180	Segmental duplication
Solyc01g090560	Solyc08g078410	Segmental duplication
Solyc02g064960	Solyc02g093150	Segmental duplication
Solyc02g077810	Solyc03g006320	Segmental duplication
Solyc02g093150	Solyc03g044300	Segmental duplication
Solyc02g077360	Solyc03g006320	Segmental duplication
Solyc02g092050	Solyc04g077490	Segmental duplication
Solyc02g093130	Solyc04g078640	Segmental duplication
Solyc02g090770	Solyc04g007170	Segmental duplication
Solyc02g077810	Solyc10g009110	Segmental duplication
Solyc03g119580	Solyc04g007170	Segmental duplication
Solyc03g119580	Solyc05g009450	Segmental duplication
Solyc03g117720	Solyc06g068570	Segmental duplication
Solyc03g118190	Solyc06g068830	Segmental duplication
Solyc03g123500	Solyc06g063070	Segmental duplication
Solyc03g026270	Solyc06g035700	Segmental duplication
Solyc03g117130	Solyc06g068360	Segmental duplication
Solyc03g120840	Solyc06g066540	Segmental duplication
Solyc03g006320	Solyc07g053740	Segmental duplication
Solyc03g026270	Solyc08g080290	Segmental duplication
Solyc03g007460	Solyc08g081960	Segmental duplication
Solyc03g120840	Solyc08g066660	Segmental duplication
Solyc03g005500	Solyc09g089910	Segmental duplication
Solyc03g120840	Solyc12g044390	Segmental duplication
Solyc03g123500	Solyc12g049560	Segmental duplication
Solyc03g118190	Solyc12g042210	Segmental duplication
Solyc04g054910	Solyc04g072900	Segmental duplication
Solyc04g051360	Solyc04g071770	Segmental duplication
Solyc04g007000	Solyc05g009790	Segmental duplication
Solyc04g007170	Solyc05g009450	Segmental duplication
Solyc04g014530	Solyc05g051180	Segmental duplication
Solyc04g014530	Solyc11g011740	Segmental duplication
Solyc04g071770	Solyc12g056590	Segmental duplication
Solyc04g072900	Solyc12g056980	Segmental duplication
Solyc04g054910	Solyc12g056980	Segmental duplication
Solyc05g052050	Solyc06g082590	Segmental duplication
Solyc05g052410	Solyc06g050520	Segmental duplication
Solyc05g051380	Solyc11g010710	Segmental duplication
Solyc06g065820	Solyc06g068360	Segmental duplication
Solyc06g035700	Solyc08g080290	Segmental duplication
Solyc06g050520	Solyc10g076370	Segmental duplication
Solyc06g063070	Solyc12g049560	Segmental duplication
Solyc06g066540	Solyc12g044390	Segmental duplication
Solyc06g066540	Solyc12g008350	Segmental duplication
Solyc06g068830	Solyc12g042210	Segmental duplication
Solyc07g064890	Solyc10g006130	Segmental duplication
Solyc07g042230	Solyc12g009240	Segmental duplication
Solyc07g049490	Solyc12g005960	Segmental duplication
Solyc08g007230	Solyc08g078170	Segmental duplication
Solyc08g007820	Solyc08g080290	Segmental duplication
Solyc08g008305	Solyc08g082210	Segmental duplication
Solyc08g080290	Solyc12g056430	Segmental duplication
Solyc08g007820	Solyc12g056430	Segmental duplication
Solyc08g066660	Solyc12g008350	Segmental duplication
Solyc09g066340	Solyc09g089910	Segmental duplication
Solyc09g009240	Solyc10g083560	Segmental duplication
Solyc09g007260	Solyc10g084340	Segmental duplication
Solyc09g007260	Solyc11g072600	Segmental duplication
Solyc10g078610	Solyc10g080650	Segmental duplication
Solyc10g084340	Solyc11g072600	Segmental duplication
Solyc12g008350	Solyc12g044390	Segmental duplication
