# Supplementary material for: Multi-Omics Analysis Reveals That SlERF.D6 Synergistically Regulates SGAs and Fruit Development
Source: Front Plant Sci. 2022 Apr 8;13:860577. doi: 10.3389/fpls.2022.860577 (PMC9024245; doi:10.3389/fpls.2022.860577)
Supplement: Supplementary file 5 [file Table_4.XLSX]

## Sheet: Supplementary Table 4
Supplementary Table 4. RNA-Seq for multiple critical periods of tomato fruit development (TPM).
Gene_ID	IMG	IMG	IMG	MG	MG	MG	Br	Br	Br	Ripe	Ripe	Ripe
Solyc00g005000	7.8587	7.07048	7.10207	0.706127	2.43227	0.949944	1.17724	5.97762	4.69614	0	0.132295	0
Solyc00g005040	0	0	0	0	0	0	0	0	0	0	0	0
Solyc00g005050	87.7524	101.841	91.6335	88.3294	91.0601	96.8087	197.161	194.969	169.103	392.165	334.111	269.974
Solyc00g005060	0	0	0	0	0	0	0	0	0	0	0	0
Solyc00g005080	0	0	0	0	0	0	0	0.391514	0.365096	0	0.632534	0.669928
Solyc00g005084	0	0	0	0	0	0	0	0	0	0.330163	0	0
Solyc00g005090	0	0	0	0	0	0	0	0	0	0	0	0
Solyc00g005092	4.20217	11.5122	5.21325	1.21664	2.60115	6.40459	2.3471	5.58701	1.89455	0.843254	13.6764	10.4291
Solyc00g005094	68.4113	219.315	131.407	13.7297	11.0679	57.1097	88.2899	171.953	104.271	26.5203	282.869	195.887
Solyc00g005096	0.0402538	0.0787706	0	0	0	0.0368108	0	0	0.136113	0.201944	0.0786061	0.291386
Solyc00g005280	0	0	0	0	0	0	0	0	0	0	0	0
Solyc00g005283	0	0.196133	0.279777	0.239406	0.116328	0.0687422	0	0	0	0	0	0
Solyc00g005285	0	0.454107	1.72738	1.00781	0.430936	1.69769	0	0	0	0	0	0.119987
Solyc00g005287	0	0.494718	0.470464	0.73196	0.469475	0.154127	0	0.458357	0	0	0	0.522871
Solyc00g005430	0	0	0.35071	0.327386	0	0	0	0	0	0	0	0
Solyc00g005440	0	0	0	0.142907	0	0.601828	0	0	0	0	0	0
Solyc00g005445	0	0	0	0	0.26921	1.3257	0	0	0	0	0	0
Solyc00g005450	0	0.230493	0	0	0	0	0	0	0	0	0	0.24361
Solyc00g005460	0	0	0	0	0	0	0	0	0	0	0	0
Solyc00g005470	0	0	0	0	0	0	0	0	0	0	0	0
Solyc00g005480	0	0	0	0	0	0	0	0	0	0	0	0
Solyc00g005840	14.5961	13.9264	13.6232	13.4653	17.593	17.3686	19.2421	16.9298	16.1323	4.36623	5.22255	3.51566
Solyc00g005850	0	0	0.102239	0	0	0	0	0	0	0	0.643709	0
Solyc00g005890	0.500339	0	0	0.0434583	0.0464565	0	0	0	0	0	0	0
Solyc00g005900	0	0	0	0	0	0	0	0	0	0	0	0
Solyc00g005903	0	0	0	0	0	0	0.123707	0	0.112337	0	0	0
Solyc00g005907	0	0.0225957	0	0	0	0	0	0	0	0	0.0225485	0
Solyc00g006020	0	0	0	0	0	0	0	0	0	0	0	0
Solyc00g006090	0	0.397714	0	0	0	0	0	0	0	0.244709	0.317507	0
Solyc00g006170	0	0	0	0	0	0	0	0	0	0	0	0
Solyc00g006480	0.185096	0	0	0	0	0	0	0	0	0	0	0
Solyc00g006483	0	0	0	0	0	0	0	0	0	0	0	0
Solyc00g006487	0	0	0	0	0	0	0	0	0	0	0	0
Solyc00g006490	20.9038	23.8452	24.297	16.2653	16.4232	18.7329	14.7973	15.4117	18.0674	20.0496	26.2485	26.7957
Solyc00g006500	0	0	0	0	0	0	0	0	0	0	0	0
Solyc00g006510	0	0	0	0	0	0	0	0	0	0	0	0
Solyc00g006520	0	0	0	0	0	0	0	0	0	0	0	0
Solyc00g006530	0	0	0	0	0	0	0	0	0	0	0	0
Solyc00g006540	0	0	0	0	0	0	0	0	0	0	0	0.0447551
Solyc00g006550	0	0	0	0	0	0	0	0	0	0	0	0
Solyc00g006560	0	0	0	0	0	0	0	0	0	0	0	0
Solyc00g006590	0	0	0	0	0.0237148	0	0	0	0	0	0.124688	0.0264119
Solyc00g006650	0	0	0	0	0	0	0	0	0	0	0	0
Solyc00g006655	0	0	0.401855	0	0	0	0.134016	0	0.243397	0	0	0
Solyc00g006660	0	0	0	0	0	0	0	0	0	0	0	0
Solyc00g006680	0	0	0	0	0	0	0	0	0	0	0	0
Solyc00g006683	0	0	0	0	0	0	0	0	0	0	0	0
Solyc00g006800	79.1405	82.4219	82.6912	101.644	112.957	66.4281	34.6301	34.276	28.8367	70.399	66.4029	69.8829
Solyc00g006805	0.945676	0.435422	0.465836	0.483172	0.723109	0.35609	0.517845	0.756413	0.470249	0.279073	0.434513	0.345151
Solyc00g006810	28.7675	30.0929	28.3468	33.1191	33.377	27.1499	70.9914	66.2727	61.7189	71.5029	50.9658	46.8552
Solyc00g006820	15.1243	7.21058	11.2294	10.7502	8.60698	4.95464	1.64936	1.72253	0.933392	0.437991	0.175501	0.876272
Solyc00g006830	19.8643	20.2683	24.356	22.3868	22.7247	21.1504	9.79319	8.77926	10.7371	17.7423	25.6488	24.0934
Solyc00g006840	0	0	0	0	0	0	0	0	0	0	0	0.186957
Solyc00g006850	0	0	0	0	0	0	0	0	0	0	0	0
Solyc00g006860	0	0	0	0	0	0	0	0	0	0	0	0
Solyc00g006867	0	0	0	0	0	0.0943163	0	0	0	0	0	0
Solyc00g006870	0	0	0	0	0	0	0	0	0	0	0	0
Solyc00g006880	0	0	0	0	0	0	0	0	0	0	0	0
Solyc00g006890	0	0	0	0	0	0	0	0	0	0	0	0
Solyc00g006900	0.127967	0	0.119068	0	0.118818	0	0	0	0	0.513587	0.124945	0
Solyc00g006903	0	0	0	0	0	0	0	0	0	0	0	0
Solyc00g006907	0	0	0	0	0	0	0	0	0	0	0	0
Solyc00g007010	8.76045	8.59441	8.95979	7.85392	9.44251	6.44329	7.80534	7.79242	8.95423	15.5766	19.813	14.2081
Solyc00g007020	0	0	0	0	0	0	0	0	0	0	0	0
Solyc00g007030	0.0508937	0.34857	0.0473544	10.2998	7.41901	4.79369	0	0	0	0	0.0496917	0
Solyc00g007040	0	0.0349513	0.132951	1.17904	1.26038	1.73134	0	0	0	0	0	0
Solyc00g007050	0	0	0	0	0	0	0	0	0	0	0	0
Solyc00g007060	11.0956	9.28329	11.2332	9.58263	10.5364	13.2021	10.5931	10.3726	8.95327	4.87061	7.90972	7.92097
Solyc00g007070	73.5206	83.6925	74.426	62.2628	65.8476	62.5425	85.7915	96.9007	95.0858	95.502	141.102	110.816
Solyc00g007080	3.4818	1.87955	1.67569	1.72067	3.79024	0.988136	2.79416	1.36047	1.21793	0.361394	0.293066	0.186235
Solyc00g007090	16.3979	16.0441	15.8778	24.4908	22.0336	19.9938	22.7733	24.7749	21.0183	16.0516	18.1584	18.7494
Solyc00g007100	10.6336	10.7283	11.1418	11.8945	12.8616	15.1055	9.14983	9.49644	9.81591	4.0999	5.51469	13.1008
Solyc00g007110	2.77834	2.56903	3.35215	3.91151	3.74197	2.87574	0.980549	0.733439	0.529093	2.78766	2.72763	7.18273
Solyc00g007120	9.37388	11.1118	10.1267	11.7236	11.6119	10.2824	7.46762	6.39359	6.83841	7.46096	8.53645	21.8105
Solyc00g007130	3.24224	2.7397	2.19401	1.3654	2.05256	1.61723	3.4298	2.85007	2.65776	5.47116	4.36478	2.38761
Solyc00g007150	17.4597	17.5817	18.1428	7.74858	8.63815	7.22563	7.83007	4.0435	5.60213	5.11482	11.9456	8.96166
Solyc00g007160	0.987176	0.436203	0.444448	0.110637	0.325243	0.0873621	0	0.0288674	0.053839	0	0	0.131722
Solyc00g007170	0.222911	0	0	0	0	0	0.207509	0	0	0	0	0
Solyc00g007180	0	0	0	0	0	0	0	0	0	0	0	0
Solyc00g007190	0.797335	0.606769	1.31891	0.384748	0.411292	0.486092	0	0.0803105	0.748915	0.35556	1.211	1.09937
Solyc00g007195	0.54661	0.415969	0.226043	0.580279	0.394744	0.166619	0.90461	1.04608	0.872808	0.182815	0.7116	0.43964
Solyc00g007200	0.221851	0.241182	0.0917434	0.385389	0.549303	0.856585	0.206522	0.245802	0.270892	0	0	0
Solyc00g007220	12.3182	23.2818	19.7363	17.4843	16.1241	23.1887	66.0619	54.7983	63.8505	59.0848	63.246	83.7623
Solyc00g007225	0	0	0	0	0	0	0	0	0	0	0	0
Solyc00g007260	14.998	17.7241	15.1492	16.4668	16.4452	14.4865	9.25092	12.8978	13.3914	14.8643	24.5614	21.1596
Solyc00g007270	253.487	248.741	262.677	200.225	203.006	179.196	207.025	202.889	202.75	196.443	211.588	206.695
Solyc00g007300	7.34516	8.31313	8.54831	5.23987	6.84137	4.7587	8.29522	6.11579	7.08511	40.661	38.5562	47.6455
Solyc00g007305	0	0	0	0.0394297	0	0	0	0	0	0	0	0
Solyc00g007320	0	0	0	0	0	0	0	0	0	0	0	0
Solyc00g007330	0	0	0	0	0	0	0	0	0	0	0	0
Solyc00g007340	0	0	0	0	0	0	0	0	0	0	0	0
Solyc00g007450	0	0	0	0	0	0	0	0	0	0	0	0
Solyc00g007550	1.68087	0.548201	1.04265	0.97331	1.04046	0.512367	0.521577	0	0	2.24868	1.64117	0.579397
Solyc00g007555	0	0	0	0.0794392	0	0	0	0	0	0	0	0
Solyc00g007560	0	0	0	1.03661	0.677185	1.21264	0	0	0	0	0	0
Solyc00g007570	0	0	0	0	0	0	0	0	0	0	0	0
Solyc00g007600	0.657075	0.642898	0.978208	0.656328	0.823628	0.510743	0.0917513	0.178694	0.3055	0.16482	0.160389	0.101922
Solyc00g007910	0	0	0	0	0	0	0	0	0	0	0	0
Solyc00g007920	0	0	0	0	0	0	0	0	0	0	0	0
Solyc00g007925	0	0	0	0	0	0	0	0	0	0	0	0
Solyc00g007930	0	0	0	0	0	0	0	0	0	0	0	0
Solyc00g007950	0	0	0	0	0	0	0	0	0	0	0	0
Solyc00g007960	0	0	0	0	0	0	0	0	0	0	0	0
Solyc00g007970	0	0	0	0	0	0	0	0	0	0	0	0
Solyc00g007980	0	0	0	0	0	0	0	0	0	0	0	0
Solyc00g007990	0	0	0	0	0	0	0	0	0	0	0	0
Solyc00g008000	0	0	0	0	0	0	0	0	0	0	0	0
Solyc00g008010	0	0	0	0	0	0	0	0	0	0	0	0
Solyc00g008020	0	0	0	0	0	0	0	0	0	0	0	0
Solyc00g008030	0	0	0	0	0	0	0	0	0	0	0	0
Solyc00g008040	0	0	0	0	0	0	0	0	0	0	0	0
Solyc00g008050	0	0	0	0	0	0	0	0	0	0	0	0
Solyc00g008055	0	0	0	0	0	0	0	0	0	0	0	0
Solyc00g008060	0	0	0	0	0	0	0	0	0	0	0	0
Solyc00g008070	0	0	0	0	0	0	0	0	0	0	0	0
Solyc00g008080	0	0	0	0	0	0	0	0	0	0	0	0
Solyc00g008090	0	0	0	0	0	0	0	0	0	0	0	0
Solyc00g008100	0	0	0	0	0	0	0	0	0	0	0	0
Solyc00g008110	0	0	0	0	0	0	0	0	0	0	0	0
Solyc00g008120	0	0	0	0	0	0	0	0	0	0	0	0
Solyc00g008130	0	0	0	0	0	0	0	0	0	0	0	0
Solyc00g008140	0	0	0	0	0	0	0	0	0	0	0	0
Solyc00g008150	0	0	0	0	0	0	0	0	0	0	0	0
Solyc00g008160	0	0	0	0	0	0	0	0	0	0	0	0
Solyc00g008165	0	0	0	0	0	0	0	0	0	0	0	0
Solyc00g008260	0	0	0	0	0	0	0	0	0	0	0	0
Solyc00g008265	0	0	0	0	0	0	0	0	0	0	0	0
Solyc00g008270	0	0	0	0	0	0	0	0	0	0	0	0
Solyc00g008570	77.331	101.684	89.4656	93.1111	107.133	69.2201	84.9381	100.145	162.564	84.98	169.386	97.7389
Solyc00g008580	35.753	40.5669	32.7075	41.4926	50.2134	33.2445	27.9686	20.6992	29.4617	30.1453	61.8966	33.244
Solyc00g008680	56.2962	49.7967	51.7442	55.8358	60.7122	52.2464	55.6996	48.723	47.3968	58.9659	47.6501	56.9181
Solyc00g008800	0	0	0	0	0	0	0	0	0	0	0	0
Solyc00g008910	0	0	0	0	0	0	0	0	0	0	0	0
Solyc00g008915	0	0	0.0196827	0	0	0	0	0	0.0357645	0	0	0
Solyc00g009020	320.06	302.569	321.469	321.187	331.637	270.014	267.064	242.659	228.769	199.496	254.856	213.759
Solyc00g009030	0.0970993	0.0950043	0	0	0.135235	0.0887943	0.677928	0.264065	0.246247	0.487125	0.331821	0
Solyc00g009040	0.173991	0	0.0179879	6.54874	4.90037	7.01849	0.359932	0.03505	0.114397	0	0.0755029	0
Solyc00g009050	0.231628	0.604348	0.3592	0.670623	0.896112	0.38833	0.107812	0.419948	0	0.232405	0	0.0399212
Solyc00g009060	32.6855	26.8762	32.536	29.2395	28.4565	32.7223	33.3864	29.9254	33.0051	50.2968	36.1315	43.4092
Solyc00g009070	0	0	0	1.11667	0.895278	0	0	0	0	0	0	0
Solyc00g009080	30.3088	29.2698	27.9569	25.4139	28.5072	22.9171	37.0089	22.8366	27.2851	28.5674	22.0346	26.7293
Solyc00g009090	0.013389	0	0	0.709395	1.03183	2.53448	0	0	0	0	0	0
Solyc00g009100	9.6218	13.1278	13.2896	6.99814	9.83033	6.60674	12.2423	12.2836	11.7081	10.4892	7.8017	7.91863
Solyc00g009110	33.4564	63.2062	44.7785	30.3253	28.1814	21.6134	16.0148	20.7648	32.1121	4.83185	4.70195	6.71634
Solyc00g009120	49.9187	87.3903	50.7657	38.5208	39.0715	31.8789	44.3574	65.821	64.2569	5.7951	6.54562	6.61262
Solyc00g009140	33.4606	27.7624	37.6925	44.021	34.6307	32.4754	63.2111	46.5098	46.1624	146.109	109.337	106.85
Solyc00g009141	38.6551	38.884	33.0188	47.6497	51.1892	39.2397	34.8887	27.6556	26.6313	36.9681	34.8253	39.318
Solyc00g009142	0	0	0	0	0	0	0	0	0	0	0	0
Solyc00g009143	0	0	0	0	0	0	0	0	0	0	0	0
Solyc00g009144	0	0	0	0	0	0	0	0	0	0	0	0
Solyc00g009145	0	0	0	0	0	0	0	0	0	0	0	0
Solyc00g009146	0	0	0	0	0	0	0	0	0	0	0	0
Solyc00g009148	0	0.0194286	0.0369522	0	0	0	0	0.0180006	0	0	0	0
Solyc00g009540	0	0	0	0	0	0	0	0	0	0	0	0
Solyc00g009650	0	0	0	0	0	0	0	0	0	0	0	0
Solyc00g009760	0.390327	0.636509	0.484244	0.22602	0.362419	0.713884	0.242239	0	0.329961	0.261091	0.762216	0.269092
Solyc00g009765	0	0	0	0	0	0	0	0	0	0	0	0
Solyc00g010410	0	0	0	0	0	0	0	0	0	0	0	0
Solyc00g010420	0	0	0	0	0	0	0	0	0	0	0	0
Solyc00g010520	0	0	0	0	0	0	0	0	0	0	0	0
Solyc00g010525	13.9802	13.082	12.5217	13.3155	16.6605	9.99654	18.528	18.4373	25.661	12.3665	25.1738	15.8531
Solyc00g010530	0	0	0	0	0	0	0	0	0	0	0	0
Solyc00g010750	0.0243891	0.0954514	0.158851	0.0423676	0.0679358	0.133818	0.158928	0.066327	0.185555	0	0	0.0504416
Solyc00g010755	0	0	0	0	0	0	0	0	0	0	0	0
Solyc00g010760	0	0	0	0	0	0	0	0	0	0	0	0
Solyc00g010780	0	0	0	0	0	0	0	0	0	0	0	0
Solyc00g010930	0	0	0	0	0	0	0	0	0	1.17737	0	0
Solyc00g011150	0	0	0	0	0.278963	0	0.559372	0.817072	0.761939	0	0	0.310691
Solyc00g011160	6.2624	7.81757	9.44359	6.37721	9.62424	6.51667	13.0666	16.2478	20.2628	7.15009	8.64463	10.4955
Solyc00g011170	0	0	0	0	0	0	0.528722	0	0	0	1.1091	0
Solyc00g011175	0	0	0	0	0	0	0	0	0	0	0	0
Solyc00g011670	0	0	0	0	0	0	0	0	0	0	0	0
Solyc00g011673	0	0	0	0	0	0	0	0	0	0	0	0
Solyc00g011677	0	0	0	0	0	0	0	0	0	0	0	0
Solyc00g011870	0	0	0	0	0.469475	0	0	0	0	0	0	0
Solyc00g011880	14.1968	20.0249	18.3056	14.96	14.4531	14.3665	22.4067	20.2516	18.276	13.9552	14.9873	12.5198
Solyc00g011890	78.939	88.4748	95.6554	55.1649	54.3456	71.3714	75.492	64.0107	94.8246	151.563	179.847	156.093
Solyc00g011895	0	0	0	0	0	0	0	0	0	0	0	0
Solyc00g012430	0	0	0	0	0.326245	0	0	0	0.297027	0	0	0
Solyc00g012435	0	0	0	0	0	0	0	0	0	0	0	0
Solyc00g012440	1.14264	0.159712	0.151882	0.141781	0.454689	0.149272	0	0.443921	0.275978	0	0.318757	0.168801
Solyc00g012540	0	0	0	0.0485343	0	0	0	0	0	0	0	0
Solyc00g012640	0	0	0	0	0	0	0	0	0	0	0	0
Solyc00g012650	0	0	0	0	0	0	0	0	0	0	0	0
Solyc00g012660	0	0	0	0	0	0	0	0	0	0	0	0
Solyc00g012670	0	0	0	0	0	0	0	0	0	0	0	0
Solyc00g012680	0	0	0	0	0	0	0	0	0	0	0	0
Solyc00g012690	0	0	0	0	0	0	0	0	0	0	0	0
Solyc00g012700	0	0	0	0	0	0	0	0	0	0	0	0
Solyc00g012702	0	0	0	0	0	0	0	0	0	0	0	0
Solyc00g012704	0	0	0	0	0	0	0	0	0	0	0	0
Solyc00g012706	0	0	0	0	0	0	0	0	0	0	0	0
Solyc00g012708	0	0	0	0	0	0	0	0	0	0	0	0
Solyc00g013110	0	0	0	0	0	0	0	0	0	0	0	0
Solyc00g013120	0	0	0	0.147592	0.157774	0.15539	0.316366	0.308076	0	0	0.16591	0
Solyc00g013130	0	0	0.146685	0.342324	0.146376	0.144164	0.0733777	0.14291	0.266534	0.158177	0.0769623	0
Solyc00g013133	0.232929	0	0	0.202317	0	0.852026	0.433671	0.422307	0	0	0	0
Solyc00g013137	0.150223	0.881888	0.139776	0.913359	0.278963	0.137374	0.978902	0.680893	0.38097	0.301453	0	0
Solyc00g013140	0.405307	0.396562	0.796144	0.899659	0.79447	0.576552	1.04806	0.694008	1.78926	0.587408	0.615587	0.18628
Solyc00g013150	0.211538	1.24184	0.196827	0.183737	0.196413	0.773779	0.98461	1.53409	0.178823	1.69798	1.23925	0.218752
Solyc00g013155	0.15587	0.610028	0.580122	0.676926	0.289451	0.712691	0.290201	0.565193	0.395292	2.34589	1.97845	0.322371
Solyc00g013160	0.221324	1.19102	1.13263	1.05731	0.719249	0.708379	2.26635	1.40443	2.80643	0.888267	0.756339	0.915489
Solyc00g013170	0.592306	3.1874	1.10223	1.02893	1.09991	2.16658	5.23812	3.75853	5.50773	3.26861	1.73495	1.83752
Solyc00g013180	0.468491	0.343787	0.544888	0.30519	0.869988	0	0.654181	0	0.396036	0.352547	0.228713	0.242234
Solyc00g013181	1.10075	0	0.170699	0.318694	0.511022	0.335532	0.341564	0.332613	0.155085	0.368146	0.179125	0.569142
Solyc00g013183	0	0	0	0	0	0	0	0	0	0	0	0
Solyc00g013184	0	0	0	0	0	0	0	0	0	0	0	0.0399957
Solyc00g013185	0	0	0	0	0	0	0	0	0	0	0	0
Solyc00g013186	0	0	0	0	0	0	0	0	0	0	0	0
Solyc00g013188	0	0	0	0	0	0	0	0	0	0	0	0
Solyc00g014170	0	0	0	0	0	0	0	0	0	0	0	0
Solyc00g014180	0	0	0	0	0	0	0	0	0	0	0	0
Solyc00g014190	0	0	0	0	0	0	0	0	0	0	0	0
Solyc00g014290	0	0	0	0	0	0	0	0	0	0	0	0
Solyc00g014390	0	0	0	0	0	0	0	0	0	0	0	0
Solyc00g014395	0.0668014	0	0.0310779	0	0	0	0	0	0.0282351	0.0670255	0.0326118	0.0690796
Solyc00g014790	0.14668	0	0	0	0	0	0.0682725	0	0	0.147172	0.214823	0.151682
Solyc00g014800	0	0	0	0	0	0	0	0.229179	0	0	0	0
Solyc00g014810	0	0	0	0.654772	0	0	0	0	0	0	1.47208	0
Solyc00g014820	0	0	0	0	0.164987	0	0	0	0.0751055	0.089144	0	0.0918758
Solyc00g014830	0.186763	0.548201	0.0695101	0.259549	0.277456	0.136631	0.278174	0.372467	0.37891	0.487213	0.291763	0.193132
Solyc00g014840	0.181848	0.177925	0.169202	0.157949	0.168846	0.166295	0	0	0	0.547375	1.77553	0.3761
Solyc00g014850	0.598001	0	0	0	0.185082	0	0	0.180699	0	0.200002	0.194626	0
Solyc00g014860	0	0	0	0	0	0	0	0	0	0	0	0.271363
Solyc00g014960	0	0	0	0	0	0	0	0	0	0	0	0
Solyc00g014970	0	0	0	0	0	0	0	0	0	0	0	0
Solyc00g014980	0	0	0	0	0	0	0	0	0	0	0	0
Solyc00g014990	0	0	0	0	0	0	0	0	0	0	0	0
Solyc00g014995	0	0	0	0	0	0	0	0	0	0	0	0
Solyc00g015000	0	0	0	0	0	0	0	0	0	0	0	0
Solyc00g015600	1.99334	0	0	0.692547	0.740326	0.364569	0	0	0	0	1.16775	0
Solyc00g015720	0	0	0	0	0	0	0	0	0	0	0	0
Solyc00g015730	0	0	0	0	0	0	0	0	0	0	0	0
Solyc00g015733	0	0	0	0	0	0	0	0	0	0	0	0
Solyc00g015735	0	0	0	0	0	0	0	0	0	0	0	0
Solyc00g015737	0	0	0	0	0	0	0	0	0	0	0	0
Solyc00g016470	0	0	0	0	0	0	0	0	0	0	0	0
Solyc00g016480	0	0	0	0	0	0	0	0	0	0	0	0
Solyc00g016490	0	0	0	0	0	0	0	0	0	0	0	0
Solyc00g016590	0	0	0	0	0	0	0	0	0	0	0	0
Solyc00g016790	0	0	0	0	0	0	0	0	0	0	0	0
Solyc00g016900	0	0	0	0	0	0	0	0	0	0	0	0
Solyc00g016910	0	0	0	0	0	0	0	0	0	0	0	0
Solyc00g016915	0	0	0	0	0	0	0	0	0	0	0	0
Solyc00g017210	0	0	0	0	0	0	0	0	0	0	0	0
Solyc00g017220	0	0	0	0	0	0	0	0	0	0	0	0
Solyc00g017230	0	0	0	0	0	0	0	0	0	0	0	0
Solyc00g017235	0	0	0	0	0	0	0	0	0	0	0	0
Solyc00g017540	0	0	0	2.63935	0.564288	0.185253	0	0	0	0	0	0
Solyc00g017550	0	0	0	0.533079	1.70957	0.187081	0	0	0	0	0	0
Solyc00g017760	0	0	0	0	0	0	0	0	0	0	0	0
Solyc00g017860	0	0	0	0	0	0	0	0	0	0	0	0
Solyc00g017870	0	0	0	0	0	0	0	0	0	0	0	0
Solyc00g017880	0	0	0	0	0	0	0	0	0	0	0	0
Solyc00g017890	0	0	0	0	0	0	0	0	0	0	0	0
Solyc00g017900	0	0	0	0	0	0	0	0	0	0	0	0
Solyc00g017910	0	0	0	0	0	0	0	0	0	0	0	0
Solyc00g017920	0	0	0	0	0	0	0	0	0	0	0	0
Solyc00g017930	0	0	0	0	0	0	0	0	0	0	0	0
Solyc00g017933	0	0	0	0	0	0	0	0	0	0	0	0
Solyc00g017937	0	0	0	0	0	0	0	0	0	0	0	0
Solyc00g018760	0	0	0	0	0	0	0	0	0	0	0	0
Solyc00g018770	0	0	0	0	0	0	0	0	0	0	0	0
Solyc00g018970	0	0	0	0	0	0	0	0	0	0	0	0
Solyc00g019610	0	0	0	0	0	0	0	0	0	0	0	0
Solyc00g019620	0	0	0	0	0	0	0	0	0	0	0	0
Solyc00g019630	0	0	0	0	0	0	0	0	0	0	0	0
Solyc00g019730	12.0095	7.69371	8.64681	10.8037	16.7263	2.87632	3.85967	3.11051	6.28469	0.2869	0.697968	0
Solyc00g019740	12.9402	8.13921	6.14301	15.0243	18.0225	5.6752	5.28553	2.51367	6.58568	0.397457	0.773544	0.273092
Solyc00g019750	7.10767	3.1874	4.40892	5.6591	9.07428	1.62494	0.551381	1.34233	2.50352	0.89144	0.289158	1.83752
Solyc00g019950	0	0	0.10099	0.377094	0.100777	0.0992543	0	0.295173	0	0	0.317923	0.336718
Solyc00g019970	0.273072	0.40077	0.0635204	0.059296	0.316934	0.374573	0	0.247543	0.05771	0	0.333278	0.0705961
Solyc00g019980	0.143135	0.140047	0.332952	0.186486	0.0664505	0.0654462	0.799471	0.648768	0.846989	1.9388	2.37582	0.592065
Solyc00g019990	0.863779	0	0.267903	0	0	0	0	0	0	1.15557	2.53013	1.19098
Solyc00g020000	1.07228	0	0	0	0	0.65371	0	1.62006	0	1.79313	2.44289	0.739231
Solyc00g020010	1.36386	0.533774	0	0	0	0.997767	0.253926	0	0	5.47375	1.33165	1.69245
Solyc00g020020	0.289602	0.283354	0	0	0.201672	0.132416	0.202195	0.131264	0.367221	0.581148	0.636215	0.224609
Solyc00g020030	0	0.302738	0	0	0	0.282949	0.57607	0.280487	0	0.620903	0	0
Solyc00g020040	0	0	0	0	0.185976	0.274748	0	0	0	0	0.097783	0.103564
Solyc00g020440	0	0	0	0	0	0	0	0	0	0	0	0
Solyc00g020540	0	0.0823135	0.136987	0.0365361	0	0.0192333	0	0	0	0	0	0
Solyc00g020545	0.309194	0.864351	0.164395	0.230193	0.0410124	0.0807851	0.0411186	0.160165	0	0.0443187	0.560655	0.319738
Solyc00g020940	0	0	0	0	0	0	0	0	0	0	0	0
Solyc00g020960	0	0	0	0	0	0	0	0	0	0	0	0
Solyc00g020970	0	0	0	0	0	0	0	0	0	0	0	0
Solyc00g020980	0	0	0	0	0	0	0	0	0	0	0	0
Solyc00g020990	0	0	0	0	0	0	0	0	0	0	0	0
Solyc00g021490	0	0	0	0	0	0	0	0	0	0	0	0
Solyc00g021500	0	0	0	0	0	0	0	0	0	0	0	0
Solyc00g021510	0	0	0	0	0	0	0	0	0	0	0	0
Solyc00g021520	0	0	0	0	0	0	0	0	0	0	0	0
Solyc00g021530	0	0	0	0	0	0	0	0	0	0	0	0
Solyc00g021630	0	0.465216	0.265446	0.165195	0.176592	0	0.442623	0.0862048	0.803881	0	0.371396	0.295014
Solyc00g021640	0.725272	0.354812	0.506126	0.275606	0.757593	0.207262	0.632963	0.575285	1.03462	1.18252	1.01796	0.562505
Solyc00g021650	0	0	0.501014	0	0	0	0	0.488121	0	1.89093	0.262871	0.556823
Solyc00g021655	0	0	0	0	0	0	0	0	0	0	0	0
Solyc00g022070	0	0	0	0	0	0	0	0	0	0	0	0.840694
Solyc00g022080	0	0	0	0	0	0	0	0	0	0	0.285086	0
Solyc00g022090	0	0	0.158107	0	0	0	0	0.154038	0	0.085247	0.497731	0.0878594
Solyc00g022100	1.29567	1.14094	0.602783	1.57554	0.842121	0.118485	0.603073	0.58727	1.31435	0.650008	1.8976	1.33986
Solyc00g022103	2.96153	1.67758	1.01521	1.08308	2.89451	2.13807	3.48241	4.66284	4.7435	5.47375	4.71785	5.48031
Solyc00g022107	0.753844	1.18013	0.911846	0.589295	1.67987	0.551493	1.05264	0.683369	1.59315	1.05892	1.8401	1.24728
Solyc00g022920	0	0	0	0	0	0	0	0	0	0	0	0
Solyc00g023020	0	0	0	0	0	0	0	0	0	0	0	0
Solyc00g023030	0	0	0	0	0	0	0	0	0	0	0	0
Solyc00g023040	0	0	0	0	0	0	0	0	0	0	0	0
Solyc00g023050	0	0	0	0	0	0	0	0	0	0	0	0
Solyc00g023250	0	0	0	0	0	0	0	0	0	0	0	0
Solyc00g023260	0	0	0	0	0	0	0	0	0	0	0	0
Solyc00g023270	0	0	0	0	0	0	0	0	0	0	0	0
Solyc00g023470	0	0	0	0.41275	0.110306	0	0	0	0	0	0	0
Solyc00g023570	0	0	0	0	0	0	0	0.170842	0	0	0.18401	0
Solyc00g023580	0	0	0	0	0	0	0	0	0	0.483727	0.235361	0.498551
Solyc00g023590	0	0.0575144	0	0	0	0.21502	0.164164	0	0	0.17694	0.344366	0
Solyc00g023600	0	0	0	0	0	0	0	0	0	0	0.232656	0
Solyc00g023700	0	0.101927	0	0	0	0	0	0	0	0.104524	0	0.107727
Solyc00g023710	0.0885928	0	0	0	0	0	0	0	0.0748915	0	0.173001	0.0916141
Solyc00g024010	0	0	0	0	0	0	0	0	0	0	0	0
Solyc00g024020	0	0	0	0	0	0	0	0	0	0	0	0
Solyc00g024030	0	0	0	0	0	0	0	0	0	0	0	0
Solyc00g024040	0	0	0	0	0	0	0	0	0	0	0	0
Solyc00g024050	0	0	0	0	0	0	0	0	0	0	0	0
Solyc00g024150	36.9032	42.7052	44.5042	55.6458	61.2241	61.4408	101.781	97.2463	76.7493	82.8251	59.9916	56.4354
Solyc00g024160	0.0753844	0	0.280568	0.392863	0.279978	0.344683	0.350879	0	0.573533	0.226912	0.220812	0.311821
Solyc00g024370	0	0	0	0	0	0	0	0	0	0	0	0
Solyc00g024570	0	0	0	0.0648873	0.17341	1.02473	0	0	0	0	0	0
Solyc00g024670	0	0	0	0	0	0	0	0	0	0	0	0
Solyc00g024680	0	0	0	0	0	0	0	0	0	0	0	0
Solyc00g024690	0	0	0	0	0	0	0	0	0	0	0	0
Solyc00g025290	0.383902	0.876444	0.952545	0.444598	0.356453	0.468088	1.31038	0.696024	0.973589	0.77038	0.999559	1.98497
Solyc00g025300	0.383902	0	0	0	0	0	0	0	0	0	0.374835	0.396994
Solyc00g025400	0	0	0.160519	0	0.320363	0.0788804	0	0	0	0.0865475	0.336883	0
Solyc00g025500	0	0	0	0	0	0	0	0	0	0	0	0
Solyc00g025510	0	0	0	0	0	0	0	0	0	0	0	0
Solyc00g025520	0	0	0	0	0	0	0	0	0	0	0	0
Solyc00g025530	0	0	0	0	0	0	0	0	0	0	0	0
Solyc00g025540	0	0	0	0	0	0	0	0	0	0	0	0
Solyc00g025650	0	0	0	0	0	0	0	0	0	0	0	0
Solyc00g025660	0	0	0	0	0	0	0	0	0	0	0	0
Solyc00g026160	0.140865	0.10337	0.0327673	1.19294	1.53683	1.83564	0.163916	0.0638482	0.02977	0.106004	0.378231	0.182087
Solyc00g026165	0	0	0	0.348508	0	0	0	0	0	0	0	0
Solyc00g026860	0	0	0	0	0	0	0	0	0	0	0	0
Solyc00g026870	0	0	0	0	0	0	0	0	0	0	0	0
Solyc00g026875	0	0	0	0	0	0	0	0	0	0	0	0
Solyc00g026890	0	0	0	0	0	0	0	0	0	0	0	0
Solyc00g026900	0	0	0	0	0	0	0	0	0	0	0	0
Solyc00g026903	0	0	0	0	0	0	0	0	0	0	0	0
Solyc00g026905	0	0	0	0	0	0	0	0	0	0	0	0
Solyc00g026907	0	0	0	0	0	0	0	0	0	0	0	0
Solyc00g027640	0	0	0	0	0	0	0	0	0	0	0	0
Solyc00g027650	0	0	0	0	0	0	0	0	0	0	0	0
Solyc00g027660	0	0	0	0	0	0	0	0	0	0	0	0
Solyc00g027670	0	0	0	0	0	0	0	0	0	0	0	0
Solyc00g027770	74.0075	78.0859	76.7231	53.0235	54.1218	45.806	48.0959	55.0797	46.3388	49.8631	102.219	97.5248
Solyc00g027970	0	0	0	0	0	0	0	0	0	0	0	0
Solyc00g027980	0	0	0	0	0	0	0	0	0	0	0	0
Solyc00g027990	0	0	0	0	0	0	0	0	0	0	0	0
Solyc00g028090	0	0	0	0	0	0	0	0	0	0	0	0
Solyc00g028100	0	0	0	0	0	0	0	0	0	0	0	0
Solyc00g028110	0	0	0	0	0	0	0	0	0	0	0	0
Solyc00g028120	0	0	0	0	0	0	0	0	0	0	0	0
Solyc00g028420	0	0	0	0	0	0	0	0	0	0	0	0.183228
Solyc00g028520	0	0	0	0	0	0	0	0	0	0	0	0
Solyc00g028530	0	0	0	0	0	0	0	0	0	0	0	0
Solyc00g028540	0	0	0	0	0	0	0	0	0	0	0	0
Solyc00g028550	0	0	0	0	0	0	0	0	0	0	0	0
Solyc00g028560	0	0	0	0	0	0	0	0	0	0	0	0
Solyc00g028760	0	0	0	0	0	0	0	0	0	0	0	0
Solyc00g028960	0	0	0	0	0	0	0	0	0	0	0	0
Solyc00g029060	0	0	0	0	0	0	0	0	0	0	0	0
Solyc00g029070	0	0	0	0	0	0	0	0	0	0	0	0
Solyc00g029080	0	0	0	0	0	0	0	0	0	0	0	0
Solyc00g029090	0	0	0	0	0	0	0	0	0	0	0	0
Solyc00g029190	0	0.0738474	0	0	0	0.10353	0	0.0684199	0.0319016	0	0	0
Solyc00g029290	0	0	0	0	0	0	0	0	0	0	0	0
Solyc00g029300	0	0	0	0	0	0	0	0	0	0	0	0
Solyc00g029500	0	0	0	0	0	0	0	0	0	0	0	0
Solyc00g030000	0	0	0	0	0	0	0.0385197	0	0.209876	0.0415175	0.808027	0
Solyc00g030100	2.50198	1.04914	0.33257	0.310452	1.32748	0.980564	0.66546	0.648023	0.906445	2.15175	0.348984	1.84808
Solyc00g030105	0	0	0	0	0	0	0	0	0	0	0	0
Solyc00g030110	0	0	0	0	0	0	0	0	0	0	0	0
Solyc00g030210	0	0	0	0	0	0	0	0	0	0	0	0
Solyc00g030215	0.229491	0	0	0	0	0.209863	0	0	0.193999	1.61183	0.224071	0.474635
Solyc00g030510	0	0	0	0	0	0	0	0.409856	0.1274	0	0	0
Solyc00g030520	22.2402	19.0034	17.4163	18.6181	17.66	14.7243	15.6448	17.4243	13.0158	12.2176	20.4376	23.1028
Solyc00g030820	0	0	0	0.478041	0.340681	0	1.19547	0.332613	0.775425	0	0	1.13828
Solyc00g031020	0	0	0	0	0	0	0	0	0	0	0	0
Solyc00g031030	0	0	0	0	0	0	0	0	0	0	0	0
Solyc00g031040	0	0	0	0	0	0	0	0	0	0	0	0
Solyc00g031050	0	0	0	0	0	0	0	0	0	0	0	0
Solyc00g031060	0	0	0	0	0	0	0	0	0	0	0	0
Solyc00g031360	0	0	0	0	0	0	0	0	0	0	0	0
Solyc00g031370	0	0	0	0	0	0	0	0	0	0	0	0
Solyc00g031380	0	0	0	0	0	0	0	0	0	0	0	0
Solyc00g031383	0	0	0	0	0	0	0	0	0	0	0	0
Solyc00g031387	0	0	0	0	0	0	0	0	0	0	0	0
Solyc00g031390	0	0	0	0	0	0	0	0	0	0	0	0
Solyc00g031490	0	0	0	0	0	0	0	0	0	0	0	0
Solyc00g031500	0	0	0	0	0	0	0	0	0	0	0	0
Solyc00g031700	0	0	0	0	0	0	0	0	0	0	0	0
Solyc00g031710	0	0	0	0	0	0	0	0	0	0	0	0
Solyc00g031720	0	0	0	0	0	0	0	0	0	0	0	0
Solyc00g031730	0	0	0	0	0	0	0	0	0	0	0	0
Solyc00g032030	0	0	0	1.13326	0.807629	0.927993	0	0	0	0	0	0
Solyc00g032035	0	0	0	0	0	0	0	0	0	0	0	0
Solyc00g032940	0	0	0	0	0	0	0	0	0	0	0	0
Solyc00g032943	0	0	0	0	0	0	0	0	0	0	0	0
Solyc00g032947	0	0	0	0	0	0	0	0.665227	0	0	0	0
Solyc00g033860	0	0	0	0	0	0	0	0	0	0	0	0
Solyc00g033870	0	0	0	0	0	0	0	0	0	0	0	0
Solyc00g033880	0	0	0	0	0	0	0	0	0	0	0	0
Solyc00g033885	0	0	0	0	0	0	0	0	0	0	0	0
Solyc00g033890	0	0	0	0	0	0	0	0	0	0	0	0
Solyc00g033990	0	0	0	0	0	0	0	0	0	0	0	0
Solyc00g034000	0	0	0	0	0	0	0	0	0	0	0	0
Solyc00g034010	0	0	0	0	0	0	0	0	0	0	0	0
Solyc00g034810	0	0	0	0	0	0	0	0	0	0	0	0
Solyc00g035010	0	0	0	0	0	0	0	0	0	0	0	0
Solyc00g035020	0	0	0	0	0	0	0	0	0	0	0	0
Solyc00g036320	0.234245	0	0	3.86574	2.39247	2.2492	0	0	0	0	0	0.121117
Solyc00g036520	0	0.109051	0	0.0968077	0	0	0	0.101036	0.188437	0.111829	0.435292	0.345769
Solyc00g036530	0	0	0	0	0	0	0	0	0	0	0	0
Solyc00g036740	0	0	0	0	0	0	0	0	0	0	0	0
Solyc00g036750	0	0	0	0	0	0	0	0	0	0	0	0
Solyc00g036760	0	0	0	0	0	0	0	0	0	0	0	0
Solyc00g036960	0	0	0	0.113963	0.243652	0	0	0	0	0	0	0
Solyc00g036962	0	0	0	0	0	0	0	0	0	0	0	0
Solyc00g036964	0	0	0	0	0	0	0	0	0	0	0	0
Solyc00g036968	0	0	0	0	0	0	0	0	0	0	0	0
Solyc00g039290	0	0	0	0	0	0	0	0	0	0	0	0
Solyc00g039990	15.6682	9.02879	17.8878	14.6944	6.87233	13.7127	16.5542	15.4233	15.5202	6.84769	24.0265	16.1031
Solyc00g040290	0	0	0	0	0	0	0	0	0	0	0	0
Solyc00g040390	0	0	0	0	0	0	0	0	0	0	0	0
Solyc00g040490	0	0	0	0	0	0	0	0	0	0	0	0
Solyc00g041090	0	0	0	0	0	0	0	0	0	0	0	0
Solyc00g041190	0	0	0	0	0	0	0	0	0	0	0	0
Solyc00g041200	0	0	0	0	0	0	0	0	0	0	0	0
Solyc00g041210	0	0	0	0	0	0	0	0	0	0	0	0
Solyc00g041215	0	0	0	0	0	0	0	0	0	0	0	0
Solyc00g041220	0	0	0	0	0	0	0	0	0	0	0	0
Solyc00g042120	0	0	0	0	0	0	0	0	0	0	0	0
Solyc00g042130	0	0	0	0	0	0	0	0	0	0	0	0
Solyc00g042140	0	0	0	0	0	0	0	0	0	0	0	0
Solyc00g042640	0.68827	0.215495	0.281779	0.573904	0.332311	0.276937	0	0.174699	0.0465461	0	0	0.0569394
Solyc00g042840	0.273492	0.374628	0.101789	1.37779	0.761813	0.90036	0.763787	0.198339	0.601108	0.932993	1.6022	0.0565638
Solyc00g042850	0	0	0	0	0	0	0.186457	0	0	0	0.097783	0
Solyc00g042854	0	0	0	0.0756564	0	0	0	0	0	0	0	0
Solyc00g042858	0	0	0	0	0	0	0	0	0	0	0	0
Solyc00g044350	0	0.212763	0	0.661068	1.91812	0.795423	0.20243	0.295689	0.183825	0	0	0
Solyc00g044550	0	0	0	0	0	0	0	0	0	0	0	0
Solyc00g044750	0	0	0.0897165	29.3125	24.9783	27.246	0	0.174815	0.16302	0	0.0941445	0
Solyc00g044755	0	0	0	0	0	0	0	0	0	0	0	0
Solyc00g046580	0	0	0	0	0	0.0429877	0	0	0	0	0	0
Solyc00g047180	0	0	0	0	0	0	0	0	0	0	0.470723	0
Solyc00g047190	0	0	0	0	0	0	0	0	0	0.196229	0.190954	0
Solyc00g047200	0	0	0.989182	2.07764	0.740326	0.243046	0.494829	0.481863	1.57272	0.53334	1.2975	0
Solyc00g047700	229.149	187.389	202.96	228.821	236.322	171.356	274.263	161.679	186.667	222.313	224.419	167.036
Solyc00g048510	0	0.0785165	0	0	0.14902	0	0	0.363729	0.746209	0	0.156705	0
Solyc00g048515	0	0	0	0.356559	0.0952895	0.187699	0	0	0	0	0	0
Solyc00g049210	0.316231	0.171893	0.359626	0.335709	0.35887	0.321315	0.228963	0.477779	0.32673	0.176273	0.343069	0.14534
Solyc00g049220	0	0	0	0	0	0	0	0	0.25398	0	0.586698	0
Solyc00g049520	128.639	30.9761	67.0653	65.5398	62.393	16.1349	21.0845	21.0992	35.1197	0.125555	0	4.9173
Solyc00g049920	0	0	0	0	0	0	0	0	0	0	0	0
Solyc00g050020	0	0	0	0	0	0	0	0	0	0	0	0
Solyc00g050030	0	0	0	0	0	0	0	0	0	0	0	0
Solyc00g050130	9.53343	8.05177	9.91649	3.78873	7.09814	5.38708	12.3911	10.762	13.0389	3.74495	5.62008	6.74287
Solyc00g050430	0.143355	0.23377	0	1.07913	1.46416	0.152942	0.0222417	0.108294	0.323158	0.0719179	0.0466563	0.172951
Solyc00g052430	0.171328	0.0558772	0.265689	0.148812	0.159078	0.208899	0.0531635	0	0.289663	0.171903	0.446084	0.236228
Solyc00g052540	0.193745	0	0	0.336565	0	0	0	0.351265	0	0.194395	0.567507	0
Solyc00g052545	1.21945	1.19314	0.567325	1.58878	2.83066	0	1.1352	3.31635	2.06172	0	0	0
Solyc00g052940	0	0	0	0.156274	0.167055	0.219374	0	0	0	0	0	0
Solyc00g053440	41.5711	54.5184	49.4983	82.9811	77.4013	71.7178	177.361	184.446	162.172	204.701	170.175	87.679
Solyc00g053740	0	0	0	0	0	0	0	0	0	0	0	0
Solyc00g055940	0	0	0	0	0	0	0	0	0	0	0	0
Solyc00g055950	0	0	0	0	0	0	0	0	0	0	0	0
Solyc00g055960	0	0	0	0	0	0	0	0	0	0	0	0
Solyc00g055970	0	0	0	0	0	0	0	0	0	0	0	0
Solyc00g055980	0	0	0	0	0	0	0	0	0	0	0	0
Solyc00g055985	0	0	0	0	0	0	0	0	0	0	0	0
Solyc00g056180	0	0	0	0	0	0	0	0	0	0	0	0
Solyc00g056680	1.15599	1.09334	0.824624	1.37222	0.82289	0.563794	1.07612	0.628751	0.423457	2.20374	1.12868	1.91266
Solyc00g057280	0	0	0	0	0	0	0	0	0	0	0	0
Solyc00g057880	3.82939	2.56723	3.4971	1.10871	0.823054	1.32941	1.7824	2.15355	1.73847	2.81053	3.80818	4.91331
Solyc00g058480	0	0	0	0.101412	0.0361361	0	0	0	0	0	0	0
Solyc00g058900	0	0	0	0	0	0	0	0	0	0	0	0
Solyc00g059100	7.76736	6.19434	6.68269	17.883	13.2385	13.6709	4.95253	3.27947	5.57669	7.09949	10.0773	6.49182
Solyc00g059500	12.926	12.4221	15.6224	12.6656	13.753	11.8204	5.86658	5.75456	4.9774	13.5694	16.3036	17.6005
Solyc00g059505	0	0	0	0	0	0	0	0	0	0	0	0
Solyc00g060700	0	0	0	0	0	0	0	0	0	0	0	0
Solyc00g060710	0	0	0	0	0	0	0	0	0	0	0	0
Solyc00g060810	2.2381	1.72531	2.01935	0.058908	0.125944	0.0620204	9.28088	0.922213	6.07724	2029.01	2322.98	3081.14
Solyc00g063110	0	0	0	0	0	0	0	0	0	0	0	0
Solyc00g063510	0	0	0	0	0	0	0	0	0	0	0	0
Solyc00g065510	0	0	0	0	0	0	0	0	0	0	0	0
Solyc00g065610	0	0	0	0	0	0	0	0	0	0	0	0
Solyc00g065620	0	0	0	0	0	0	0	0	0	0	0	0
Solyc00g065630	0	0	0	0	0	0	0	0	0	0	0	0
Solyc00g065930	0	0	0	0	0	0	0	0	0	0	0	0
Solyc00g065940	0	0	0	0	0	0	0	0	0	0	0	0
Solyc00g066140	0	0	0	0	0	0	0	0	0	0	0	0
Solyc00g066150	0	0	0	0	0	0	0	0	0	0	0	0
Solyc00g066155	0	0	0	0.651541	0.379904	0.0623605	0	0	0	0	0	0
Solyc00g066350	0	0	0	0	0	0	0	0	0	0	0	0
Solyc00g068970	47.917	50.9755	43.9925	46.5951	55.6349	38.9961	55.779	60.664	84.7791	41.9654	84.1603	59.3297
Solyc00g068980	0	0	0	0.333449	0	0	0	0	0	0	0	0
Solyc00g068985	0	0	0	0	0	0	0	0	0	0.0815696	0	0
Solyc00g069680	0	0	0	0	0	0	0	0	0	0	0	0
Solyc00g069880	0	0	0	0	0	0	0.139674	0.340036	0	0.225817	0.805737	0.620633
Solyc00g069883	0	0	0	0	0	0	0	0	0	0	0	0
Solyc00g069887	0	0	0	0	0	0	0	0	0	0	0	0
Solyc00g071180	0	0	0.0254697	0	0.0254161	0	0	0	0	0	0	0
Solyc00g071580	0	0	0	0	0	0	0	0	0	0	0	0
Solyc00g071590	0	0	0	0	0	0	0	0	0	0	0	0
Solyc00g071600	0	0	0	0	0	0	0	0	0	0	0	0
Solyc00g072100	42.2463	29.5442	28.6758	32.9045	38.9042	27.1697	44.8074	41.2476	56.672	2.84903	2.70482	6.08754
Solyc00g072400	0	0	0	0	0	0	0	0	0	0	0	0
Solyc00g072405	0	0	0	0	0	0	0	0	0	0	0	0
Solyc00g072800	0	0	0	0	0	0	0	0	0	0	0.384324	0.101761
Solyc00g073900	0	0	0	0	0	0	0	0	0	0	0	0
Solyc00g073910	0	0	0	0	0	0	0	0	0	0	0	0
Solyc00g074210	0	0	0	0	0	0	0	0	0	0	0	0
Solyc00g074810	0	0	0	0	0	0	0	0	0	0	0	0
Solyc00g074820	0	0	0	0	0	0	0	0	0	0	0	0
Solyc00g074830	0	0	0	0	0	0	0	0	0	0	0	0
Solyc00g075030	4.21516	4.77541	2.61469	0.578083	2.12855	1.69063	3.57972	0.804442	7.50162	7.41983	5.84849	5.58247
Solyc00g075035	0	0	0	0.112305	0.320141	1.14297	0	0	0	0	0	0
Solyc00g076250	0	0	0	0	0	0	0	0	0	0	0	0
Solyc00g080750	0.127312	0.0622828	0.296147	0.387033	0.0591049	0.814962	0.118516	0.0577052	0.107623	0	0	0
Solyc00g082150	54.7393	62.1434	58.7894	66.6145	61.8701	65.501	48.0522	62.2687	50.929	32.637	47.9262	52.2401
Solyc00g084650	0	0	0	0	0	0	0	0	0	0	0	0
Solyc00g084750	0	0	0	0	0	0	0	0	0	0	0	0
Solyc00g084760	0	0	0	0	0	0	0	0	0	0	0	0
Solyc00g084870	0	0	0	0	0	0	0	0	0	0	0	0
Solyc00g085070	30.1979	30.0438	32.3867	54.0481	51.5461	53.2155	42.4984	43.2897	40.1395	59.0682	33.7866	63.7523
Solyc00g085770	0	0	0	0	0	0	0	0	0	0	0	0
Solyc00g085780	0	0	0	0	0	0	0	0	0	0	0	0
Solyc00g088080	0	0	0	0	0	0	0	0	0	0	0	0
Solyc00g088090	0	0	0	0	0	0	0	0	0	0	0	0
Solyc00g088190	0	0	0	0	0	0	0	0	0	0	0	0
Solyc00g088200	0	0	0	0	0	0	0	0	0	0	0	0
Solyc00g088210	0	0	0	0	0	0	0	0	0	0	0	0
Solyc00g090110	0	0	0	0	0	0	0	0	0	0	0	0
Solyc00g090115	0	0	0	0.0381892	0.10206	0	0	0	0	0	0	0
Solyc00g090120	0	0	0	0	0	0	0	0	0	0	0	0
Solyc00g090130	0	0	0	0	0	0	0	0	0	0	0	0
Solyc00g090430	0	0	0	13.8432	10.8306	3.69646	0	0	0	0	0	0
Solyc00g090630	0	0	0	0	0	0	0	0	0	0	0	0
Solyc00g090640	0	0	0	0	0	0	0	0	0	0	0	0
Solyc00g090650	0	0	0	0	0	0	0	0	0	0	0	0
Solyc00g090660	0	0	0	0	0	0	0	0	0	0	0	0
Solyc00g090860	0	0	0	0	0	0	0	0	0	0	0	0
Solyc00g090870	8.17065	10.9437	9.15245	12.8157	12.0794	15.0887	14.843	13.9507	13.1435	5.01435	3.56284	4.92192
Solyc00g091170	6.31045	5.76516	5.51789	5.05187	5.64748	5.28402	5.41439	5.20359	3.95268	1.2587	1.55891	2.94834
Solyc00g092870	0	0	0	0	0	0	0	0	0	0	0	0
Solyc00g092880	0	0	0	0	0	0	0	0	0	0	0	0
Solyc00g092890	0	0	0	0	0	0	0	0	0	0	0	0
Solyc00g092900	0	0.0569759	0.108365	0	0.0540688	0.0532516	0	0	0	0.116855	0.341142	0
Solyc00g093000	1.48076	0.482939	0.459263	2.1436	0.458297	1.35411	0.918969	0.447444	0	0.990488	2.89158	3.57295
Solyc00g093100	0	0	0	0	0	0	0	0.0968694	0	0	0	0
Solyc00g094010	0	0	0	0	0	0	0	0	0	0	0	0
Solyc00g094020	0	0	0	0	0.0370876	0	0	0	0	0	0	0
Solyc00g094520	0.334366	0.654304	0.622227	1.16169	0	0.305767	0	0	1.69593	1.67744	1.63234	0.345769
Solyc00g094530	0.159467	0.156026	0.296754	0.138509	0.592261	0.58331	0.296898	0	0	0.320004	0.622802	0.659621
Solyc00g094540	0.753844	1.84395	0.175355	0.163693	1.04992	0.344683	0	0	0	0.56728	1.28807	1.36422
Solyc00g094550	0	0	0.247295	0	0.246775	0	0.247415	0.481863	0	0.80001	0.519002	0
Solyc00g095450	0	0	0	0	0	0	0	0	0	0	0	0
Solyc00g095460	0	0	0	0	0	0	0	0	0	0	0	0
Solyc00g095465	0	0.0806498	0	0.143191	0.114802	0	0	0	0	0	0.0402407	0
Solyc00g095860	6.29325	5.25196	4.13337	8.60119	11.0851	4.2316	11.2861	3.52362	10.7964	76.4224	52.0485	198.012
Solyc00g096060	0	0	0	0	0	0	0	0	0	0	0	0
Solyc00g096460	11.1549	13.7549	17.4881	16.7232	12.9111	13.9736	6.82792	7.89569	7.62127	16.4051	32.0774	21.8064
Solyc00g097260	0	0	0	0	0.289451	0	0.1451	0	0.263528	0	0	0
Solyc00g097960	7.35489	8.67778	8.55427	5.82462	7.93372	6.528	4.93366	5.68682	5.0288	4.99206	8.23724	5.70429
Solyc00g098560	22.5578	22.6384	28.7374	21.1497	23.0492	21.737	15.7494	18.7767	18.98	11.5283	12.9166	10.5735
Solyc00g099160	0	0	0	0	0	0	0	0	0	0	0	0
Solyc00g099460	0	0	0	0	0	0	0	0	0	0	0	0
Solyc00g099470	0	0	0	0	0	0	0	0	0	0	0	0
Solyc00g099570	0	0	0	0	0	0	0	0	0	0	0	0
Solyc00g099580	0	0.448253	0.426277	2.68601	2.23325	3.0374	0	0	0	0	0	0
Solyc00g099880	0	0	0	0	0	0	0	0	0	0	0	0
Solyc00g100880	0	0	0	0	0	1.42063	0	0	0	0	0	0.107099
Solyc00g101700	0	0	0	0	0	0	0	0	0	0	0	0
Solyc00g102400	1.62126	1.58628	2.47325	0.76959	0.560126	0.913688	0.438732	0.495593	0.478089	0.208066	0.349725	0.194947
Solyc00g104200	0	0	0	0	0	0	0	0	0	0	0	0
Solyc00g104210	0	0	0	0	0	0	0	0	0	0	0	0
Solyc00g104310	0	0	0	0	0	0	0	0	0	0	0	0
Solyc00g104320	0	0	0	0	0	0	0	0	0	0	0	0
Solyc00g104330	0	0	0	0	0	0	0	0	0	0	0	0
Solyc00g104333	0	0	0	1.29386	0.345781	1.02167	0	0	0	0	0	0
Solyc00g104337	0	0	0	0	0	0	0	0	0	0	0	0
Solyc00g104630	0	0	0	0	0	0	0	0	0	0	0	0
Solyc00g104730	0	0	0	0	0	0	0	0	0	0	0	0
Solyc00g104740	0	0	0	0	0	0	0	0	0	0	0	0
Solyc00g104940	0.417397	1.22517	1.29457	0.483389	0.387553	0.63616	1.55423	0.630626	3.1756	0	0	0.431631
Solyc00g106650	0.560289	9.59351	11.7298	6.32651	13.2658	6.91695	2.08631	6.34887	6.63093	8.71362	2.73528	19.4098
Solyc00g107050	0	0	0	0.124181	0	0	0	0	0	0.14345	0	0
Solyc00g107055	0	0	0	0	0	0	0	0	0	0	0	0
Solyc00g108550	0.255935	0.375619	0.714409	0.11115	0.356453	0.117022	0.238251	0.58002	0.108177	0.513587	0.624725	0.661657
Solyc00g108555	0.199334	0.195033	0.370943	0	0	0	0.371122	0.542096	0.168506	0	0	0
Solyc00g109450	0	0	0	0	0	0	0	0	0	0	0	0
Solyc00g109850	0	0	0	0	0	0	0	0	0	0	0	0
Solyc00g109860	0	0	0	0	0	0	0	0	0	0	0	0
Solyc00g110060	0	0	0	0	0	0	0	0	0	0	0	0
Solyc00g110070	0	0	0	0	0	0	0	0	0	0	0	0
Solyc00g110370	0	0	0	1.72233	1.67378	3.46182	0	0.163414	0	0	0	0
Solyc00g110870	1.09814	0.759973	0.672874	0.977082	1.1937	0.930734	0.249333	0.1214	0.158491	0.188116	0.313815	0.0830918
Solyc00g111170	0	0	0	0	0	0	0	0	0	0	0	0
Solyc00g111370	0	0	0	0	0	0	0	0	0	0	0	0
Solyc00g111770	0	0	0	0	0	0	0	0	0	0	0	0
Solyc00g111780	0	0	0	0	0	0	0	0	0	0	0	0
Solyc00g112190	0	0	0	0.0441329	0	0	0	0	0	0.050981	0.099221	0
Solyc00g112490	0	0	0	0	0	0	0	0	0	0	0	0
Solyc00g112500	0	0	0	0	0	0	0	0	0	0	0	0
Solyc00g112505	0	0	0	0	0	0	0	0	0	0	0	0
Solyc00g112600	0	0	0	0	0	0	0	0	0	0	0	0
Solyc00g112700	0	0	0	0	0	0	0	0	0	0	0	0
Solyc00g112710	0	0	0	0	0	0	0	0	0	0	0	0
Solyc00g112810	0	0	0	0	0	0	0	0	0	0	0	0
Solyc00g112820	0	0	0	0	0	0	0	0	0	0	0	0
Solyc00g112930	1.08589	1.78687	2.6178	0.685952	0.641616	0.947879	1.70009	1.70029	2.92077	0.198098	1.10844	0.357295
Solyc00g113730	0	0	0	0	0	0	0	0	0	0	0	0
Solyc00g113740	0	0	0	0	0	0	0	0	0	0	0	0
Solyc00g113750	0	0	0	0	0	0	0	0	0	0	0	0
Solyc00g114550	0	0	0	0	0	0	0	0	0	0	0	0
Solyc00g117450	0	0	0	0	0	0	0	0	0	0	0	0
Solyc00g117650	0	0	0	0	0	0	0	0	0	0	0	0
Solyc00g117653	1.95327	4.96893	1.81743	4.61466	6.38392	3.07227	7.49144	15.3694	16.71	4.07643	3.1277	12.5233
Solyc00g117655	0.694884	0.339946	0.64656	0.15089	0.967801	0.317725	2.26405	2.36221	1.6154	1.04582	2.20503	0.179645
Solyc00g117657	0	0	0	0	0	0	0	0	0	0	0	0
Solyc00g118680	0.529295	0.517875	0.246243	0.574667	0.245725	0.242012	0.246362	0.719719	0.894874	0.132768	0.258397	0
Solyc00g118690	0	0	0	0	0	0	0	0	0	0	0	0
Solyc00g120120	0	0	0	0	0	0	0	0	0	0	0	0
Solyc00g120820	0	0	0	0	0	0	0	0	0	0	0	0
Solyc00g120830	0	0	0	0	0	0	0	0	0	0	0	0
Solyc00g120930	0	0	0	0	0	0	0	0	0	0	0	0
Solyc00g121230	0	0	0	0	0	0	0	0	0	0	0	0
Solyc00g121235	0	0	0	0	0	0	0	0	0	0	0	0
Solyc00g122530	0	0	0	0	0	0	0	0	0	0	0	0
Solyc00g123030	0	0	0	0	0	0	0	0	0	0	0	0
Solyc00g123040	0	0	0	0	0	0	0	0	0	0	0	0
Solyc00g123240	0	0	0	0.26875	0	0	0	0	0	0	0	0
Solyc00g124840	0	0	0	0	0	0	0	0	0	0	0	0
Solyc00g124850	0	0	0	0	0	0	0	0	0	0	0	0
Solyc00g124860	0	0	0	0	0	0	0	0	0	0	0	0
Solyc00g125260	0	0	0	0	0	0	0	0	0	0	0	0
Solyc00g125270	0	0	0	0	0	0	0	0	0	0	0	0
Solyc00g125275	0	0	0	0.409543	0.394017	6.03653	0	0	0	0	0	0
Solyc00g125980	0	0	0	0	0	0	0	0	0	0	0	0
Solyc00g125990	1.30734	1.27914	0.926801	1.13553	0.809245	1.25245	1.50678	1.69303	2.42082	0.562169	0.729408	0.901284
Solyc00g126000	0.406484	0.795429	3.02573	1.05919	1.13226	4.46061	1.89199	2.94787	3.4362	1.22354	0.396884	2.10173
Solyc00g126010	1.07228	1.74857	0.997709	0.620904	0.33187	1.63427	1.99638	4.21215	2.71934	1.07588	2.0939	2.58731
Solyc00g126420	0	0	0	0	0	0	0	0	0	0	0	0
Solyc00g126430	0	0	0	0	0	0	0	0	0	0	0	0
Solyc00g126440	0	0	0	0	0	0	0	0	0	0	0	0
Solyc00g127540	0	0	0	0	0	0	0	0	0	0	0	0
Solyc00g127545	0	0	0	0	0	0	0	0	0	0	0	0
Solyc00g127550	0	0	0	0	0	0	0	0	0	0	0	0
Solyc00g127560	0	0	0	0	0	0	0	0	0	0	0	0
Solyc00g127660	0	0	0	0	0	0	0	0	0	0	0	0
Solyc00g127670	5.20001	4.32464	4.76581	3.27454	3.30733	2.75804	3.84837	3.44113	4.68153	1.46089	2.03088	1.29056
Solyc00g127870	7.28312	6.00818	4.252	14.6365	12.3977	9.92498	7.37813	7.83207	7.84684	2.006	0.8366	1.84596
Solyc00g128870	89.6027	75.3867	51.0088	50.2174	47.4796	32.4385	51.0334	69.7416	59.4863	47.2628	37.446	51.4505
Solyc00g128875	0	0	0	0	0	0	0	0	0	0	0	0
Solyc00g129670	0	0	0	0	0	0	0	0	0	0	0	0
Solyc00g129680	0	0	0	0	0	0	0	0	0	0	0	0
Solyc00g129685	0	0	0	0	0	0	0	0	0	0	0	0
Solyc00g129880	0	0	0	0	0	0	0	0	0	0	0	0
Solyc00g129980	0	0	0	0	0	0	0	0	0	0	0	0
Solyc00g130180	0	0	0	0	0	0	0	0	0	0	0	0
Solyc00g130190	0	0	0	0	0	0	0	0	0	0	0	0
Solyc00g130290	0	0	0	0	0	0	0	0	0	0	0	0
Solyc00g130690	0	0	0	0	0	0	0	0	0	0	0	0
Solyc00g130700	0	0	0	0	0	0	0	0	0	0	0	0
Solyc00g130800	0	0	0	0	0	0	0	0	0	0	0	0
Solyc00g130810	0	0	0	0	0	0	0	0	0	0	0	0
Solyc00g131610	0	0	0	0	0	0	0	0	0	0	0	0
Solyc00g133110	0.163234	0.0958272	0.243012	0.0992469	0.0454689	0.0746361	0.0303911	0.118379	0.0689945	0.0982689	0.44626	0.0675203
Solyc00g133710	0	0	0	0	0	0	0	0	0	0	0	0
Solyc00g133720	0	0	0	0	0	0	0	0	0	0	0	0
Solyc00g134620	0	0	0	4.28073	1.30744	0.786918	0	0	0	0	0	0
Solyc00g134820	0	0	0	0	0	0	0	0	0	0	0	0
Solyc00g134830	0	0	0	0	0	0	0	0	0	0	0	0
Solyc00g134840	0	0	0	0	0	0	0	0	0	0	0	0
Solyc00g135040	0	0	0	0	0	0	0	0	0	0	0	0
Solyc00g135050	0	0	0	0	0	0	0	0	0	0	0	0
Solyc00g135060	0	0	0	0	0	0	0	0	0	0	0	0
Solyc00g135260	0	0	0	0.777247	0.138478	0.136385	0	0	0	0	0	0
Solyc00g136260	211.847	352.665	331.293	115.529	117.598	79.2897	173.122	253.358	192.259	9.1096	3.39814	23.0025
Solyc00g136560	3.25188	5.07086	3.21484	4.14849	2.83066	6.13333	26.2041	23.8593	19.5863	54.6517	22.92	34.7837
Solyc00g136565	0	0	0	0.951033	1.32164	1.75224	0	0	0	0	0	0
Solyc00g139760	0	0	0	0	0	0	0	0	0	0	0	0
Solyc00g140060	89.8176	123.059	165.464	67.8248	80.8178	67.1555	21.1291	25.3575	37.9635	47.0095	81.5968	89.3636
Solyc00g141360	0	0	0	0	0	0.164849	0	0.163414	0	0	0	0
Solyc00g141560	0	0	0	0	0	0	0	0	0	0	0	0
Solyc00g142160	0.391145	0.191353	0	0	0	0.35769	0	0.531868	0.495979	0.196229	0	0.202242
Solyc00g142170	0.270401	0.705511	0	0.313152	0	0.0824243	0.167812	0.0817072	0.228582	0.994795	0.352019	0.186415
Solyc00g143770	13.5022	18.2151	22.0809	19.1908	19.755	16.8373	6.85599	5.00725	8.81995	10.058	16.9785	16.0783
Solyc00g143777	0	0	0	0	0	0	0	0	0	0	0	0
Solyc00g144470	0	0	0	0	0	0	0	0	0	0.168833	0	0
Solyc00g145170	0.239508	0	0	0.138687	0.148255	0	0	0.217117	0	0	0	0
Solyc00g147570	0	0	0.0340195	1.30204	0.678959	0.534958	0	0	0	0	0.0356985	0
Solyc00g147577	1.66196	2.56752	2.03471	4.17866	4.54816	10.7186	1.87284	1.348	2.29225	0.351059	0	0.633181
Solyc00g153680	0.0867394	0	0.242122	4.59573	2.5772	3.64874	0.0807462	0	0.0733247	0.696243	0.508144	0
Solyc00g153980	0.370191	0	0.688894	0	0	1.35411	0	0	0	0	0.361448	0.382816
Solyc00g154480	0	0	0	0	0	0	0	0	0	0	0	0
Solyc00g154980	0.0698004	0	0	2.30383	2.78682	0.446812	0	0.12655	0	0	0	0
Solyc00g156980	24.3407	0.524571	2.3945	43.0287	27.678	12.9435	0	0	0	0	0	0
Solyc00g157080	0	0	0.0543353	0	0	0	0	0	0	0	0	0
Solyc00g157083	0	0	0	0	0	0	0	0	0	0	0	0
Solyc00g157087	0	0	0	0.0530635	0.226898	0.279336	0	0	0	0	0	0
Solyc00g160780	1.47783	1.32545	0.802119	0.320903	1.02913	0.900954	0	1.00476	0.104107	0	0	0
Solyc00g160785	0	0	0	0	0	0	0	0	0	0	0	0
Solyc00g164580	0	0.341856	0	0	0	0	0.325253	0	0	0.233711	0.227428	0.120436
Solyc00g164680	11.7082	14.2126	17.3934	14.1338	15.4405	15.3161	8.49768	6.00837	7.17983	27.5169	22.747	33.6956
Solyc00g165190	0	0	0	0	0	0	0	0	0	0	0	0
Solyc00g165195	0	0	0	0	0	0	0	0	0	0	0	0.0532393
Solyc00g167290	0	0	0	0	0	0	0	0	0	0	0	0
Solyc00g167300	0	0	0	0	0	0	0	0	0	0	0	0
Solyc00g167800	0	0	0	0	0	0	0	0	0	0	0	0
Solyc00g170200	0	0	0	0	0	0	0	0	0	0	0	0.502446
Solyc00g170210	18.1546	16.2864	17.658	9.9299	10.1055	9.2	15.9211	18.8203	22.3439	11.8378	16.5203	15.5581
Solyc00g170510	0	0	0	12.188	5.30536	0.0710909	0	0	0	0	0	0
Solyc00g171710	0	0	0	0	0	0	0	0	0	0	0	0
Solyc00g171810	3.89008	4.28795	4.21518	0.641552	1.05158	1.53102	7.42597	6.82963	16.5672	1.4822	7.93296	3.81907
Solyc00g172410	0	0	0	0.0805047	0.0860588	0.127137	0	0	0.0783514	0	0	0
Solyc00g173430	0	0	0	0	0	0.146958	0	0	0	0	0	0
Solyc00g174330	0	0.975556	0	0.216508	1.0415	68.726	103.028	5.98804	19.2806	0.625258	0	0.257768
Solyc00g174340	16.657	41.984	10.192	6.84079	85.9878	4795.11	3297.07	119.813	814.167	87.8334	1.50261	20.0335
Solyc00g174345	0	0	0	0	0	0	0	0	0	0	0	0
Solyc00g178340	0.605276	1.11041	0	0	0.0702499	0	0.140864	0	0	0.151827	0.147745	0
Solyc00g179240	0	0.202834	0.19289	0.540187	0.577454	0.189576	0	0	0	0	0	0
Solyc00g180440	0	0	0	0	0	0	0	0	0	0.170961	0	1.2334
Solyc00g180840	0	0	0	0.0957778	0.588717	0	0	0	0	0	0	0
Solyc00g181240	0	0.338057	0.964452	0	0	0	0	0	0	1.04001	0	0.357295
Solyc00g181250	0.469966	0	0.0728805	0.136067	0.0727273	0.0716281	0.145831	0	0.0662139	0.392952	0.535343	0.161998
Solyc00g183050	4.78401	6.76114	12.3648	6.00208	7.89681	6.31919	5.44312	2.40931	1.7974	8.53344	7.78503	18.6893
Solyc00g183055	0	0	0	0	0	0	0	0	0	0	0	0
Solyc00g183550	0	0	0	0	0	0	0	0	0	0	0	0
Solyc00g183555	0	0	0	0	0	0	0	0	0	0	0	0
Solyc00g184350	12.7558	12.7545	13.924	11.809	12.3637	10.5836	4.25741	5.64062	5.41781	12.3927	19.9879	16.7941
Solyc00g184357	0	0	0	0	0	0	0	0	0	0	0	0
Solyc00g185750	0	0	0	0	0	0	0	0	0	0	0	0
Solyc00g185850	0	0	0	0	0	0	0	0	0	0	0	0
Solyc00g187050	0.040889	6.68113	3.11973	0.497213	0.303724	0.22435	0.647085	0.259465	0.276522	0	0.0798465	0.12685
Solyc00g188750	0	0	0	0	0	0	0	0	0	0	0	0
Solyc00g188850	0	0	0	0.0864299	0	0	0	0	0	0	0	0
Solyc00g188853	0	0	0	0	0	0	0	0	0	0	0	0
Solyc00g188855	0	0	0	0	0	0	0	0	0	0	0	0
Solyc00g188857	90.6761	93.2226	100.226	104.31	103.422	97.5936	41.7423	37.4913	33.437	90.4187	75.9648	58.7821
Solyc00g195350	0	0	0	0	0	0	0	0	0	0	0	0
Solyc00g195360	0	0	0	0	0	0	0	0	0	0.234589	0	0
Solyc00g198360	0	0	0	0	0	0	0	0	0	0	0	0
Solyc00g201060	0	0	0	0	0	0	0	0	0	0	0	0
Solyc00g201160	13.974	19.8327	19.039	6.50225	7.30729	7.47771	11.8292	9.88354	13.8574	1.19409	1.04954	11.5525
Solyc00g201165	0	0	0	0	0	0	0	0	0	0	0	0
Solyc00g202560	0	0	0	0	0	0	0	0	0	0	0	0
Solyc00g203660	0.489702	0	0.0911293	0.425344	0.818439	0.0895634	0.0911733	0.177568	0.331174	2.35845	2.77319	7.08963
Solyc00g207960	1.94785	1.3613	1.81239	5.92151	4.26309	6.7433	1.16567	3.65763	1.41138	3.76917	3.12446	3.59693
Solyc00g209460	0.980948	0.191957	0.456365	0.596421	0.637568	0.538228	0.730537	0.800318	1.07801	1.47636	1.62823	0.811521
Solyc00g210860	0	0	0	0	0	0.435806	0	0	0	0	0.232656	0
Solyc00g212260	0	0	0	11.9808	7.73577	3.28781	0	0	0	0	0	0
Solyc00g212265	0	0	0	0.0841412	0	0	0	0	0	0	0	0
Solyc00g213960	0	0	0	0	0	0	0	0	0	0	0	0
Solyc00g215560	1.49475	2.19374	1.78817	1.06646	1.38787	3.31961	0.397563	0.435538	1.08307	3.3209	8.33967	3.47787
Solyc00g217560	0	0	0	0	0	0	0	0	0	0	0	0
Solyc00g217960	20.3105	20.1464	21.1137	21.1695	15.997	28.5645	18.6464	28.316	33.1547	25.2976	19.694	17.2371
Solyc00g218560	0	0	0	3.46274	3.94841	2.6735	0	0	0	0	0	0
Solyc00g222060	0	0	0	0	0	0	0	0	0	0	0	0
Solyc00g222063	0	0	0	0	0	0	0	0	0	0	0	0
Solyc00g222067	0	0	0	0	0	0	0	0	0	0	0	0
Solyc00g226760	0	0	0	21.0073	23.4481	16.1427	0	0	0	0	0	0
Solyc00g227860	57.9667	52.6249	58.8091	37.427	40.2134	30.7105	32.1229	43.8495	31.8494	6.00602	2.79335	8.37481
Solyc00g227960	0	0	0	4.047	2.82144	2.53179	0	0	0	0	0	0
Solyc00g230060	0	0	0.137779	0	0	0	0	0	0.187764	0	0.144579	0
Solyc00g230070	0.235576	0	0	0.204616	0.218733	0	0.438599	0	0	0.236367	0.460024	1.21805
Solyc00g230080	0	0.170449	0.162093	0.605251	1.45577	0	1.62171	0	0.441797	1.74792	0.680372	1.26104
Solyc00g230280	0	0	0	0	0	0	0	0	0	0	0	0
Solyc00g231680	0	0	0	0	0	0	0	0	0	0	0	0
Solyc00g231780	0.375783	0	0	0.163198	0.348915	0	0.174909	0	0.4765	0.94261	0.733816	0.582898
Solyc00g233480	0.112667	0.440944	0	1.4679	1.15072	0	0	0	0	0	0	0
Solyc00g237680	0	0	0	0.0407996	0	0	0	0	0	0	0	0
Solyc00g240580	0	0	0	0	0	0	0	0	0	0	0	0
Solyc00g244280	0.679695	0.997546	0.316214	0.590368	0.946647	0	0	0	0	0	0	0
Solyc00g244290	0.632034	1.85519	1.41139	1.31753	1.05632	0.69357	2.70648	2.52097	4.38115	2.79028	1.7279	1.43789
Solyc00g244300	2.89266	1.88683	4.03724	1.88437	1.34292	1.32262	3.59039	4.80742	7.53966	1.45118	0.706084	1.74493
Solyc00g244305	0	0	0	0.116169	0	0.244614	0	0	0	0	0	0
Solyc00g245200	0	0	0	0	0	0	0	0	0	0	0	0
Solyc00g247300	8.59046	21.2212	25.4325	9.3731	7.64666	14.4779	13.185	18.4065	13.4435	0.356169	0	0.110125
Solyc00g247305	0	0	0	0	0	0	0	0	0	0	0	0
Solyc00g249200	0	0	0	0	0	0	0	0	0	0	0	0
Solyc00g249205	0	0	0	0	0	0	0	0	0	0	0	0
Solyc00g249900	0.121232	0	0	0	0	0	0	0	0	0	0	0
Solyc00g249910	0.212987	0	0	0.184995	0.395517	0	0	0	0	0	0	0
Solyc00g254110	0	0	0	0	0	0	0	0	0	0	0	0
Solyc00g254910	0	0	0	0.34363	0	0	0	0	0	0	0	0
Solyc00g255510	0	0	0	0	0	0	0	0	0	0	0	0
Solyc00g256710	50.8155	68.7658	87.2711	81.6868	74.8813	63.1149	23.0639	22.0012	27.7829	24.0979	38.7543	44.7054
Solyc00g257110	0.0670897	0	0.0936361	0.55359	0.280318	0.460135	0.0624542	0.425724	0.0567139	0.0673148	0.229268	0.138755
Solyc00g265110	0.048474	0	0	0.336827	0.135024	0.132984	0.315873	0.175769	0	0.14591	0.189316	0.0501271
Solyc00g265510	44.9165	82.824	34.9614	51785.2	32772.5	38615.4	1.6082	0.391514	14.9689	4.76673	3.37351	4.01957
Solyc00g266110	0	0	0	0.181881	0.194429	0	0	0	0	0	0	0
Solyc00g268310	0	0	0	0	0	0	0	0	0	0	0	0
Solyc00g269810	0	0	0	0	0	0	0	0	0	0	0	0
Solyc00g270510	0	0	0	0	0	0	0	0	0	0	0	0
Solyc00g272810	0.171328	0.0838158	0.159414	0	0	0	0.0797452	0	0	0	0	0
Solyc00g273110	258.147	326.95	292.091	176.918	209.289	120.666	128.196	174.802	167.179	77.093	167.391	111.442
Solyc00g275310	0	0	0	0	0	0	0	0	0	0	0	0
Solyc00g277510	2.03242	1.59086	0.504289	1.52994	0.377421	0.247811	0.378399	2.08807	1.03086	18.897	28.4433	44.2765
Solyc00g278110	0.510532	0.0908213	0.302291	0.0806249	0.129281	0.339539	0.216026	0.126219	0.117703	0.186271	0	0
Solyc00g280110	0	0	0	0	0	1.82724	0	0	0	0	0	0
Solyc00g281110	0	0	0	0	0	0	0	0	0	0	0	0
Solyc00g282510	0	0.104374	0	0.0617709	0.231114	15.9985	5.62731	0.967032	1.17232	1.21305	0.833252	10.3327
Solyc00g283010	0	0	0	0	0.0302649	0	0	0	0	0	0	0
Solyc00g283110	0	0	0	0	0	0	0	0	0	0	0	0
Solyc00g284510	0	0	0	0	0	0	0	0	0	0	0	0
Solyc00g286010	0	0	0	0	0	0	0	0	0	0	0	0
Solyc00g286020	0	0	0	0	0	0	0	0	0	0	0	0
Solyc00g286030	0	0	0	0	0	0	0	0	0	0	0	0
Solyc00g289230	2.31459	3.80725	3.80787	1.74818	1.30815	2.66879	5.24615	2.00698	2.8357	1.37995	2.68571	1.49162
Solyc00g294230	0	0	0.0974194	0	0.388858	0.478727	0.0974664	0	0.177016	0	0	0
Solyc00g294233	0	0	0	0	0	0	0	0	0	0	0	0
Solyc00g294237	0	0	0	0.415283	0.0682974	0	0	0	0.0932711	0.332115	0.143639	0.912782
Solyc00g300730	0	0	0	0	0	0	0	0	0	0	0	0
Solyc00g304030	0	0	0	0	0	0	0	0	0	0	0	0
Solyc00g304035	0	0	0	0.0362298	0	0	0	0	0	0.0837033	0	0.0862684
Solyc00g306830	0	0	0	0	0	0	0	0	0	0	0	0
Solyc00g308530	0	0	0	0	0	0	0	0	0	0	0	0
Solyc00g308930	0	0	0	0.782879	0.669512	0.494546	0	0	0	0	0	0
Solyc00g309530	0	0.765412	0	0	0	0	0	0	0	0.392458	0.381907	0.404485
Solyc00g311230	2.99372	2.83464	2.69567	3.3552	3.04867	2.38442	1.07879	3.15156	2.77564	0.775165	0.660035	0
Solyc00g313030	0	0	0	0	0	0	0	0	0	0	0	0
Solyc00g316530	1.04966	2.31077	0.97666	0.683781	0.487303	1.19985	1.95426	4.75763	0.22183	2.36965	4.35567	2.17091
Solyc00g318130	0	0	0	4.73205	3.29516	3.99969	0	0	0	0	0	0
Solyc00g318830	0	0.0418503	0.0397986	0.965946	0.595723	0.117344	0	0.0775488	0.0361581	0.729583	4.76097	0.398086
Solyc00g318835	0	0	0	0	0	0	0	0	0	0	0	0
Solyc00g320430	1.03654	0.676114	0.964452	0	0	0	0	1.25284	0.292077	0.346671	0	0.357295
Solyc00g322630	0	0	0	0.545643	0	0	0	0	0	0	0	0
Solyc00g322635	0	0	0	5.42741	9.62424	0.268902	0	0	0	0	0	0
Solyc01g005000	62.3012	59.4269	53.6371	120.389	236.621	100.242	60.8406	72.8298	67.2084	3.24776	0.674703	3.30968
Solyc01g005010	37.2934	37.3436	27.7396	10.9555	11.762	9.68684	10.1151	22.1255	21.2788	1.09571	0.213251	0.282323
Solyc01g005020	48.0608	56.451	63.2063	36.8101	40.0388	31.6148	23.174	30.3305	33.6656	15.1383	30.7309	26.1562
Solyc01g005030	19.2744	32.726	32.1138	12.3106	13.5959	17.9533	31.9812	33.0909	41.346	25.8865	34.1884	28.8606
Solyc01g005040	0	0	0	0	0.0568361	0	0	0	0	0	0	0
Solyc01g005050	0	0	0	0	0	0	0	0	0	0	0	0
Solyc01g005060	0	0	0	0	0	0	0	0	0	0	0	0
Solyc01g005070	0	0	0	0.27077	0.144725	0.380102	0	0	0	0	0	0
Solyc01g005080	5.66867	11.2069	7.03261	17.1215	13.0176	29.055	25.2992	25.313	27.4898	4.51739	15.1694	3.85975
Solyc01g005090	0	0	0	0	0	0	0	0	0	0	0.140036	0.29663
Solyc01g005100	20.9085	24.9107	23.888	19.8594	21.1304	17.5919	23.0057	26.2066	30.5704	8.06322	15.9012	19.8198
Solyc01g005110	14.8222	13.6801	11.0189	15.6614	15.3941	18.4452	26.3159	20.224	26.4807	15.4852	13.5023	19.7522
Solyc01g005120	7.86337	9.92314	6.44354	10.7882	9.45831	6.70052	11.0633	6.96624	12.0104	7.26216	10.0769	4.8512
Solyc01g005130	11.0429	14.426	14.9608	10.3821	14.2533	13.594	15.7587	22.4962	24.6712	14.2456	19.6092	28.0468
Solyc01g005140	0.644221	5.67289	7.00861	2.71169	1.84049	2.76433	8.58046	4.49227	9.63504	24.5128	66.2875	65.2867
Solyc01g005150	0.766227	0.312373	0.178235	0.443685	0.652156	0.0583909	0	0.115766	0.161932	0	0	0
Solyc01g005160	0	0	0	0.0421692	0.0450784	0.0443971	0.497147	0.0440109	0.0410412	0	0	0.0502054
Solyc01g005170	1.38205	2.46299	2.25039	1.62913	0.962424	0.722194	0.59733	0.536933	0.917956	2.37717	4.28918	4.18545
Solyc01g005180	11.2667	16.0945	13.6281	52.2572	47.912	44.7152	8.18082	8.57926	9.90521	13.7915	23.9813	29.8264
Solyc01g005190	1.00774	0.986	0.870686	0.312608	0.601515	1.0532	1.54119	2.08807	2.37312	0.361116	1.19479	2.38197
Solyc01g005200	0.139601	0.409766	0.324731	0	0.0648097	0.191491	0.194933	0.37965	0.531049	0.0700345	0.477062	0.144362
Solyc01g005210	23.4281	27.7224	29.0722	34.9638	30.65	33.4989	35.979	30.7554	40.4041	76.0172	68.8928	61.0891
Solyc01g005220	6.89024	8.72883	8.54013	12.0141	14.5139	18.7146	14.5755	18.948	12.0405	4.41113	2.35965	11.9906
Solyc01g005230	0.242464	0.118617	0	0.737097	1.23821	2.43899	0.28214	0.274746	0.563657	0	0.0591844	0.125367
Solyc01g005240	37.7595	40.5837	41.1895	56.0825	54.7479	56.4712	36.9057	37.7414	30.5443	45.4012	30.6642	31.7025
Solyc01g005250	37.2073	36.0008	35.6832	42.4925	43.7733	26.6219	32.0358	29.7862	27.2665	41.9509	46.7126	28.8572
Solyc01g005260	9.72732	8.28939	7.88301	6.21406	7.342	7.17366	6.7184	8.81795	6.3131	1.38528	4.22795	3.30975
Solyc01g005270	18.1588	22.7782	22.7136	5.48853	5.37311	8.45488	12.1363	10.4917	11.5269	5.20563	8.83247	5.77786
Solyc01g005280	36.6443	16.8327	21.0499	13.8222	8.78561	2.43853	10.2497	3.27507	12.2163	3.45232	0.419939	1.42325
Solyc01g005290	38.602	27.9771	36.9152	2.17317	1.32748	0.65371	35.2694	6.15621	38.0707	68.1388	31.4086	241.728
Solyc01g005295	38.1297	26.4409	41.3337	5.46618	3.09351	0.677056	15.5076	1.00675	12.2046	89.144	50.6027	242.705
Solyc01g005300	99.1434	118.484	121.114	1.24913	0.899292	1.95928	0.710369	0.771572	2.20815	0.559516	17.939	70.3225
Solyc01g005305	0	0	0	0	0	0	0	0	0	0	0	0
Solyc01g005310	0.229491	0.280675	0.240223	0.498327	0.426166	0.236095	0.160226	0.104018	0.169749	0	0	0.0593294
Solyc01g005320	0.371455	0.46728	0.83937	0.322637	0.443438	0.533788	0.246993	0.625353	0.538299	0	0.259058	0.438997
Solyc01g005330	38.9465	37.9193	35.9892	46.4202	46.8561	39.0738	22.2619	28.0331	26.3676	11.7289	14.5467	27.7716
Solyc01g005340	22.248	33.1745	34.7246	13.6761	14.2315	13.6766	18.5489	27.5785	21.5753	21.2741	25.7133	34.6301
Solyc01g005350	0	0	0	0	0	0	0	0	0	0	0	0
Solyc01g005360	0	0	0	0	0	0	0	0	0	0	0	0
Solyc01g005370	36.3087	45.4912	41.923	12.8021	17.5795	23.1217	48.5247	49.9689	67.1608	63.7233	31.3561	56.7541
Solyc01g005380	0.307882	0.167355	0.190981	0.118853	0.127053	0.218982	0.605064	0.31011	0.318103	0.102972	0.0668022	0.283006
Solyc01g005385	0.0798358	0.0390567	0	0	0.111191	0.0365037	0.0371598	0	0	0	0.0389751	0
Solyc01g005390	0.142153	0.0695432	0	1.48166	2.77178	1.29995	3.10979	3.35046	6.36894	0.499206	1.80435	0.661506
Solyc01g005400	0.56947	1.11437	1.25495	5.64918	6.53985	11.9501	45.2	61.0512	117.664	0.631526	10.5351	3.09943
Solyc01g005410	25.9637	29.4546	19.3425	42.1061	38.3635	40.7811	5.62088	37.846	19.542	1.21167	3.36883	0.0891998
Solyc01g005420	4.06091	1.61875	1.81928	6.13997	8.51867	6.87699	2.38021	2.52235	1.97072	0.452726	0.36713	0
Solyc01g005430	4.47211	5.65913	5.71459	5.82656	6.50536	8.39732	5.68959	7.08103	7.43494	10.4101	11.5566	8.07767
Solyc01g005440	159.04	158.544	147.688	159.295	154.237	122.385	54.6022	79.8383	87.6609	51.6637	53.4662	57.6919
Solyc01g005450	1.8862	2.05056	1.46252	1.50178	0.972965	0.814521	1.12181	2.08983	0.531496	0.210281	0.920824	0.541812
Solyc01g005460	0.691344	0.394583	0.536055	0.925749	0.775645	0.316106	0.294972	0.287243	0.413967	0.0578053	0.140628	0.0595767
Solyc01g005470	0	0.0701849	0.133488	0.0623053	0.199811	0.983957	0.600987	0.195079	2.183	0.21592	0	0
Solyc01g005480	6.94735	5.55561	6.21559	6.55651	7.03986	6.38367	4.44629	5.02618	3.55763	3.75343	4.6961	4.49017
Solyc01g005490	25.5286	23.877	26.4247	24.0607	22.8028	27.4252	31.5299	32.427	41.9803	26.0425	22.1225	23.0693
Solyc01g005500	0	0	0	0	0	0	0.234014	0.0455764	0	0	0	0.311947
Solyc01g005510	0.111455	0.254452	0	0.0322692	0.068991	0.0339742	0	0.202072	0	0	0	0.0768376
Solyc01g005520	19.8045	23.9249	24.6793	38.5722	39.5915	32.3403	42.3748	48.2258	36.5582	27.4746	18.7448	26.7492
Solyc01g005530	8.14493	6.31018	7.52216	6.07513	6.8035	6.39611	4.90445	3.54078	4.42808	1.73167	1.03472	1.37769
Solyc01g005540	8.1495	9.55208	10.5589	10.9197	10.7433	7.52877	8.77747	6.47994	7.00671	9.29314	8.01134	10.412
Solyc01g005550	43.107	43.3551	39.9692	52.476	44.0498	50.266	43.071	57.3331	57.307	15.132	18.5168	21.8839
Solyc01g005560	59.2944	46.1427	44.858	74.6572	64.6063	49.8175	74.9904	19.0444	58.514	45.5377	38.0891	19.1778
Solyc01g005570	40.4412	48.8077	41.0826	52.4915	50.429	39.6025	31.0996	32.469	30.0579	22.412	21.3008	33.8065
Solyc01g005575	52.9253	58.5516	66.6717	60.5372	61.3204	52.3372	75.0874	75.072	79.5503	76.675	58.9391	81.5217
Solyc01g005590	85.7001	33.0455	45.5461	186.61	166.743	68.1657	3.87814	13.0829	13.0806	2.98568	3.77704	2.46174
Solyc01g005600	39.305	46.1052	41.4281	33.3094	30.8522	32.6716	34.9469	36.3636	43.3765	58.4915	66.8482	66.6444
Solyc01g005610	0	0	0	0.252896	0.0540688	0.159755	0	0	0	0	0	0.0602182
Solyc01g005620	234.342	170.096	192.702	302.631	276.195	180.263	193.209	224.23	180.063	135.303	118.014	120.686
Solyc01g005630	0	0	0	0	0	0	0	0	0	0	0	0
Solyc01g005640	33.4777	35.8331	31.4423	24.4333	26.0355	24.0805	33.3817	30.5109	46.6859	40.804	45.323	51.3947
Solyc01g005650	0	0	0	0	0	0	0	0	0	0	0	0
Solyc01g005660	0.161959	0.475393	0.150696	14.4894	9.925	7.84962	0.150768	0.734088	0.136911	0	0.948801	0
Solyc01g005665	0.185096	0.181102	0	17.2024	13.4052	20.6502	0	0.838958	1.09529	0	1.26507	0.382816
Solyc01g005670	9.50753	9.09257	9.17892	7.26458	6.83653	5.68727	8.31825	8.87791	9.78961	5.4511	8.51521	8.72292
Solyc01g005680	0.130245	0.127435	0.181782	0	0.604664	0	0.303115	0.0590345	0.275256	0	0	0.134687
Solyc01g005690	73.4832	70.1159	81.5901	87.5134	83.4054	60.37	30.6852	36.6911	29.058	25.2161	27.8722	41.4786
Solyc01g005700	11.1912	10.5477	11.8298	10.1403	9.47088	8.75305	6.8628	6.96782	7.00848	6.32981	8.37806	9.12331
Solyc01g005705	0	0	0	0	0	0	0	0	0	0	0	0
Solyc01g005710	0.308901	0.402982	0.191613	0.268305	0	0.0941602	0	0	0.261128	0	0	0
Solyc01g005715	0.1104	0.108018	0.342409	0.223746	0.0683378	0.067305	0.0685148	0	0.0311088	0	0	0.0380551
Solyc01g005720	0.339384	0.470421	0.157891	0.221086	0.105039	0.25863	0.0263279	0	0.0478161	0.113508	0	0.058493
Solyc01g005730	1.6437	1.67388	0.780301	2.2872	2.24254	1.07365	0.780677	0.881856	0.992494	0.841434	0.458536	0.502988
Solyc01g005740	0	0	0	0	0	0	0	0	0	0	0	0
Solyc01g005750	0	0	0	0	0	0	0	0	0	0	0	0
Solyc01g005755	0	0	0	0	0	0	0	0	0	0	0	0
Solyc01g005760	1.20364	1.00227	1.08419	1.46808	1.33158	1.87351	1.10855	0.406265	0.281433	0.783703	1.51277	0.940133
Solyc01g005770	0	0	0	0.0269151	0.07193	0	0.0288466	0	0	0.0466373	0.0151279	0.0160222
Solyc01g005775	1.54909	1.31689	1.55951	1.01464	0.848851	0.905691	1.39478	1.35823	1.7174	0.738923	1.5125	0.997916
Solyc01g005790	2.03242	2.73981	3.10978	2.39298	1.7613	2.0651	2.14426	1.59676	1.41266	2.17519	3.26327	2.38197
Solyc01g005795	0.270401	1.32283	1.25798	0.117432	0.125534	0.247273	0	0	0.342873	0.542615	0.924049	0.838866
Solyc01g005800	0.0852239	0.104231	0.0198243	0.148047	0.296739	0.487091	0.337176	0.0193141	0.0720436	0.128265	0	0.0220326
Solyc01g005810	131.325	134.841	140.936	81.2629	81.8897	76.4073	107.483	141.272	132.006	53.3572	134.383	77.4087
Solyc01g005820	214.766	187.534	204.09	186.63	180.305	152.084	213.287	210.123	216.644	129.498	172.677	143.84
Solyc01g005825	0	0	0	0	0	0	0	0	0.263528	0.156393	0	0
Solyc01g005830	13.1031	11.8914	14.4889	14.5974	15.4282	13.0822	8.95679	12.4519	11.3709	2.44522	2.47219	1.73465
Solyc01g005840	32.1634	31.191	24.6962	22.3739	21.9353	23.7512	35.9029	32.3173	33.5053	26.8452	21.538	31.5679
Solyc01g005850	0.490253	0.685251	0.716822	1.09497	0.585258	0.576413	0.260788	0.698376	0.592048	0	0.273528	0.217274
Solyc01g005860	0.920002	0.18003	1.02723	1.11873	0.170845	0.504788	0.342574	1.00079	1.08881	0.184618	0.538964	0.380551
Solyc01g005865	0.48874	0.358646	0.113688	0.636762	0.226898	0.335203	0.227485	0.886098	0.206577	0	0	0.379055
Solyc01g005870	1.91243	1.37219	1.06766	0.265775	0.497193	0.419725	0.403532	0.901493	0.301777	0.127923	0.0248968	0.474635
Solyc01g005880	0	0	0	0	0	0	0	0	0	0	0	0
Solyc01g005890	0	0.0771233	0	0	0	0	0	0	0	0	0	0
Solyc01g005895	0	0	0	0	0	0	0	0	0	0	0	0
Solyc01g005900	0.0740382	0.434645	0.206668	0.192924	0.206234	0.135411	0.0689227	0.268467	0.0625879	0.0742866	0.361448	0.459379
Solyc01g005910	7.87869	7.90488	7.73683	5.22464	5.54128	5.73797	8.76166	6.81069	7.73702	5.82234	7.04772	11.16
Solyc01g005920	1.88132	1.73453	1.44752	1.31983	1.51166	2.41519	2.99747	2.82054	5.47453	0.653411	0.529871	1.57135
Solyc01g005930	22.3892	25.683	24.5037	9.98414	11.1907	13.3357	25.354	22.4734	25.8156	29.9093	28.3933	41.2491
Solyc01g005940	0	0	0	0	0	0	0.143482	0.209584	0.130294	0	0.0752456	0
Solyc01g005950	44.9262	42.9314	41.7207	49.7447	49.2837	41.5363	39.6267	40.6734	38.9627	34.9398	34.5122	45.9465
Solyc01g005960	34.8587	40.6381	38.8717	31.2895	32.7495	28.9247	30.0096	30.4115	34.372	34.6833	32.5896	34.9429
Solyc01g005970	6.6506	6.55736	6.28367	6.28954	6.41351	6.45747	4.68515	4.027	4.71037	5.51353	5.13966	7.35538
Solyc01g005980	9.92561	11.3915	11.5345	9.20318	10.9658	9.11496	11.501	11.4654	9.24025	1.72285	1.92188	2.5552
Solyc01g005990	69.2764	73.9105	63.3485	22.7993	23.3336	16.8436	7.08069	30.2846	8.82534	0	0	0.308456
Solyc01g006000	25.4237	27.9496	27.1679	13.6287	15.4215	15.7482	12.4034	17.4979	14.2819	13.9624	19.3047	16.015
Solyc01g006010	9.28361	9.67313	10.1151	9.09329	8.4146	7.14814	7.46369	6.86736	7.61004	12.8229	15.4996	15.4393
Solyc01g006020	42.1915	60.4555	55.7755	17.5223	18.5706	23.4027	20.4967	21.5271	35.8613	29.8992	27.3508	39.1004
Solyc01g006040	14.944	14.6216	15.2446	14.9535	15.6434	20.1183	9.48782	8.02084	10.4282	19.0558	23.4644	19.9706
Solyc01g006050	0	0.131332	0.041631	0	0	0.163663	0	0.0811194	0	2.73845	2.7522	1.94327
Solyc01g006060	1.18154	0.315286	0.0999432	0.559779	0.897598	0	0	0	0.181602	0	0	0
Solyc01g006070	0	0	0	0	0	0	0	0	0	0	0	0
Solyc01g006080	0.0604394	0	0	3.25477	0.785652	0.16581	0	0.164367	0	0	0	0
Solyc01g006090	5.93557	4.93381	6.8424	4.24302	6.63292	4.85148	14.3271	7.76149	7.14897	3.95275	8.3597	4.67139
Solyc01g006100	3.45983	2.40909	3.33773	3.1895	3.66575	1.18404	0.731098	0.923598	0.699788	0.170378	0.165797	0.263398
Solyc01g006110	43.7747	57.4179	53.0419	53.3232	52.8242	54.0483	81.5713	85.5521	88.0313	100.622	127.217	106.742
Solyc01g006120	100.737	101.91	100.42	119.168	113.443	103.046	58.2412	67.3659	63.5747	109.382	124.811	108.607
Solyc01g006130	74.251	63.1861	72.7895	56.5707	57.5749	34.5939	43.0224	49.9411	41.8107	19.4695	24.3849	20.8258
Solyc01g006140	0.732063	0.097673	0.619231	2.65903	3.18233	1.36933	1.0532	1.41774	0.618846	1.10178	0	0.82585
Solyc01g006150	33.431	20.5823	29.9285	8.60508	11.1033	8.34133	10.3195	1.10778	2.58257	7.48809	1.44884	3.83622
Solyc01g006160	798.784	560.852	583.692	645.06	630.189	403.044	817.061	570.995	717.673	361.545	518.979	394.528
Solyc01g006170	22.9485	17.1572	21.1952	19.2959	20.5748	16.1389	33.1204	21.6209	20.162	19.6876	38.1516	24.7223
Solyc01g006180	7.09208	5.26496	7.72946	5.83695	6.14754	6.82564	7.94095	5.14775	6.56125	4.80197	7.28776	6.46208
Solyc01g006190	69.9074	70.3028	74.035	47.7835	45.2246	49.3879	101.301	106.188	118.816	80.2392	82.7985	118.636
Solyc01g006195	44.5239	56.0099	58.3055	30.0786	35.6534	29.2981	34.43	38.4395	31.4646	62.4008	72.9139	105.24
Solyc01g006200	8.06285	11.6409	10.9787	8.83942	7.21247	6.78876	15.5607	15.5986	20.5724	9.02715	14.3528	11.3882
Solyc01g006210	3.25898	1.22232	3.53773	3.77423	4.74067	1.53979	1.36521	3.54516	1.33156	1.41696	0.848534	0.898698
Solyc01g006220	8.19187	6.11019	6.76768	10.5612	8.93639	5.81157	2.90672	3.76297	4.50278	2.91179	2.86938	2.62115
Solyc01g006230	29.1785	35.4199	33.5147	20.0769	21.5102	23.4126	43.9037	30.6555	43.3515	88.2711	77.6245	72.9685
Solyc01g006240	3.45512	0.866813	1.40134	1.53899	2.46775	0.162031	0.164943	0	0.0748915	0	0	0.274842
Solyc01g006250	5.71882	10.2816	7.11699	10.9279	11.4827	22.4876	8.18516	9.52593	8.58101	4.44695	5.37436	9.46215
Solyc01g006260	6.35911	5.28862	5.73938	5.68908	6.49489	5.75706	8.40603	6.39873	8.81606	0.382827	1.17969	0.723358
Solyc01g006270	0	0	0	0	0	0	0	0	0	0	0	0
Solyc01g006280	73.1115	67.4582	88.8758	50.8572	54.6003	39.6339	67.6878	52.0676	62.3025	19.4422	3.98522	11.357
Solyc01g006290	0	0	0	0	0	0.658122	16.023	0	3.49816	5.29534	0.70268	0.558166
Solyc01g006300	0	0	0	0	0	0	1.11605	0	0	0	0	0
Solyc01g006310	0	0	0	0	0	0	0	0	0	0	0	0
Solyc01g006320	0.121232	0.711699	0.112801	0.737097	0.450257	1.88467	3.15996	0.879189	0.717382	0.364917	0.473476	0
Solyc01g006330	0.645314	1.34171	1.08829	0.910821	1.34814	1.62283	3.04118	0.840916	2.18205	0.283272	0.196898	0.834151
Solyc01g006340	9.81049	10.4998	9.35892	7.25991	9.47078	6.70425	7.84682	10.0491	9.1615	12.4375	17.3248	19.8872
Solyc01g006350	67.753	68.7559	73.832	58.663	61.0111	46.876	38.5156	37.8295	42.4287	56.0582	81.2814	82.3512
Solyc01g006360	38.5638	41.7424	61.7469	49.2716	52.0803	36.4503	7.1053	6.27846	6.5319	45.5715	63.4374	53.2775
Solyc01g006370	58.4241	47.4362	61.8136	88.2576	86.2459	47.8519	15.218	17.2629	18.7688	12.011	9.1882	11.32
Solyc01g006380	0.193866	0.0758732	0.252537	0.370452	0.108003	0.319111	0.0360942	0.0702967	0	0	0	0
Solyc01g006390	0	0	0	0	0	0	0	0	0	0	0	0
Solyc01g006400	0.658615	23.3827	29.5026	11.2777	12.2305	31.0606	4.029	0.682335	0.397684	1.13284	0.183731	1.84864
Solyc01g006410	0	0.119314	0	0	0	0	0	0	0	0	0	0
Solyc01g006420	0	0	0	0	0	0	0	0	0	0	0	0
Solyc01g006430	270.222	645.041	429.243	535.436	630.034	804.152	246.24	333.181	254.977	120.733	213.015	720.072
Solyc01g006440	0	0	0	0	0	0	0	0	0	0.70884	0.0222511	0.0471331
Solyc01g006450	29.4226	21.7348	28.9507	48.0769	48.8668	22.2312	22.8704	24.6716	20.3642	41.6251	17.7394	22.173
Solyc01g006460	0.112463	0	0.0348807	0	0	0	0	0.0679662	0.0950702	0	0.146409	0
Solyc01g006470	0	0	0	1.24611	1.33207	0.45918	0	0	0	0	0	0
Solyc01g006480	13.3698	12.6404	15.1424	11.3518	10.3216	9.66195	13.1453	12.8462	14.0959	14.721	16.9165	19.7807
Solyc01g006490	13.4888	15.9778	16.2359	12.0152	12.551	14.146	13.7858	13.5026	15.4058	18.1126	23.3422	21.962
Solyc01g006500	10.7934	13.4808	11.9803	14.2281	11.6651	15.202	9.49841	12.1754	12.5567	9.78494	14.3676	13.1354
Solyc01g006510	88.661	102.594	113.618	74.5907	74.4938	75.4837	64.1372	70.6324	68.7504	44.1842	63.2119	50.8098
Solyc01g006520	3.50149	4.08391	4.29365	2.61836	2.75593	3.88058	1.85644	1.38738	1.43098	0.162866	0.181128	0.167857
Solyc01g006530	0	0	0	0	0	0	0	0	0.0869708	0	0	0
Solyc01g006540	1.04233	15.51	6.26355	0.924202	0.725851	2.38294	72.5103	12.5984	25.3507	2697.59	2192.82	1862.29
Solyc01g006545	0	0	0	0	0	0	0	0	0	0	0	0
Solyc01g006550	0.144409	0.329684	0.246338	0.188146	0.0446946	0.396172	0.134431	0.152727	0.162767	0	0.0234997	0.647113
Solyc01g006560	0.0829228	0.121701	0.19289	2.12473	1.77086	0.341236	0.0385967	0.0751706	0.0350492	0.083201	0.161929	0.0428754
Solyc01g006565	0.0861387	0	0.0801484	1.34673	0.559859	0.393856	0	0	0	0	0	0
Solyc01g006570	0	0	0	0	0	0	0	0	0	0	0	0
Solyc01g006575	0	0	0	0.190542	0.101844	0.300914	0	0	0	0	0	0
Solyc01g006580	0	0.0517875	0	0.13792	0.0982901	0.338816	0	0	0.223718	1.69943	0.258397	0.547345
Solyc01g006590	0	0	0	0	0	0.225685	0	0	0	0	0	0
Solyc01g006600	0	0	0	0.897362	0.986293	6.58681	0	0	0	0	0	0
Solyc01g006610	0	0	0	50.5723	59.6276	168.291	0	0	0	0	0	0
Solyc01g006620	0.215664	0.448398	0.0250833	0.0936605	0.0750916	0.419088	0	0	0.205099	0.0811453	0	0.473915
Solyc01g006630	15.9067	18.1574	17.2092	20.8869	22.5885	15.7441	16.5497	17.6711	16.3997	9.2631	11.968	11.3532
Solyc01g006640	0	0	0	0	0	0	0	0	0	0	0	0
Solyc01g006650	0.135731	0.371848	0.214697	0.235786	0.201643	0.558549	0.126353	0.0984338	0.252428	0.231517	0.331314	0.645657
Solyc01g006660	0.190773	0.311096	0.118338	0.0368226	0.0590444	0.155072	0.0197325	0.0192154	0.0179188	0.0212682	0.0620892	0.0876797
Solyc01g006665	0	0	0	0	0	0	0	0	0	0	0	0
Solyc01g006670	9.57953	20.7228	19.5676	1.59261	1.35504	2.806	5.92188	5.86846	6.548	9.72431	16.2586	35.8327
Solyc01g006680	103.876	151.868	160.237	5.94785	5.28219	4.68855	2.22296	2.00554	4.42321	3.06542	19.1324	59.4106
Solyc01g006690	1.35872	1.78261	1.81014	2.95037	1.97837	2.20262	0.862389	0.699826	0.652605	0	0.0904517	0.351263
Solyc01g006700	19.6075	20.9285	22.6516	19.4908	20.1327	17.6178	10.2288	14.0558	12.6119	18.6933	22.649	29.0381
Solyc01g006710	16.9248	21.4471	20.3832	10.9464	10.2764	9.25921	8.89922	9.59365	9.09428	14.1445	22.9273	13.1717
Solyc01g006720	2.7218	2.46284	1.33291	5.97245	3.9523	2.18957	3.73393	3.91436	4.54982	0.4928	0.139869	0.296276
Solyc01g006730	0.0608533	0	0	0.0792838	0.113005	0.0556485	0.0566488	0.0551644	0.0771631	0	0	0
Solyc01g006735	0	0	0	0.159347	0	0	0	0.332613	0	0	0	0
Solyc01g006740	6.50625	5.31738	7.54943	6.88115	6.92945	5.17979	6.62676	6.38372	8.67064	1.53602	0.971572	3.04745
Solyc01g006750	0	0	0	0	0	0	0	0	0	0	0.112035	0
Solyc01g006755	0	0	0	0	0	0	0	0	0	0	0	0
Solyc01g006760	0	0	0	0.153753	0	0	0	0	0	0	0	0
Solyc01g006770	0	0	0	4.65678	4.28666	1.47085	0	0	0	0	0	0
Solyc01g006780	1.30403	2.1592	2.05335	9.0612	9.12751	5.41208	2.33448	3.00076	3.90064	0.100646	0.0979407	0.414923
Solyc01g006790	2.38219	1.33188	3.72059	12.8581	9.55841	7.23552	5.22719	8.17519	8.99005	0.0853636	0.332275	0.263939
Solyc01g006800	45.895	46.0131	46.2223	33.9759	32.5539	35.5371	28.5053	32.1474	33.1444	27.2958	53.6769	41.0931
Solyc01g006810	21.6576	22.1866	23.3946	15.6137	16.6545	8.667	15.0206	13.2069	13.2428	8.48776	2.86791	6.6824
Solyc01g006820	0.971752	1.90157	0.452087	0.773705	0.751894	0.444318	0.376921	0.293635	0.547644	0.487506	0	0.251223
Solyc01g006825	112.151	101.768	88.2533	89.3642	93.2957	66.1409	41.5034	70.3449	45.564	17.7187	10.0456	49.0156
Solyc01g006830	38.4829	32.028	35.3078	33.9428	34.2933	32.3042	30.1398	31.2671	33.2615	17.483	18.6997	32.1873
Solyc01g006840	0.0156144	0	0	0.0542492	0	0	0	0	0	0	0	0
Solyc01g006850	1.30275	1.33006	1.72161	0.55757	1.01677	0.552498	0.439398	0.650383	0.574577	0.568313	1.0692	1.07384
Solyc01g006860	3.72842	3.92664	3.58959	2.76615	2.45214	2.3914	2.24156	2.11241	2.34196	3.58506	4.22181	5.38174
Solyc01g006870	46.5155	22.3183	26.3013	26.4558	22.5708	11.3909	10.7213	13.9272	15.4073	10.2318	11.8783	11.0079
Solyc01g006880	29.3438	24.1968	29.3375	22.4071	22.02	18.1572	8.94963	9.35049	11.9828	21.4755	33.6761	41.6926
Solyc01g006890	3.4894	3.49738	2.13809	17.8153	15.8439	7.88007	1.34686	1.31156	2.26627	0.982017	2.07743	0.902099
Solyc01g006900	518.431	559.703	543.21	333.532	360.809	265.985	318.28	546.783	484.663	249.972	664.785	362.434
Solyc01g006910	0	0	0	0	0	0	0	0	0	0	0	0
Solyc01g006920	1.19065	1.16496	1.82723	0.550663	0.473794	0.509055	0.446232	0.280348	0.235288	1.02398	1.23802	1.40715
Solyc01g006925	2.05837	5.3226	4.24085	1.27704	0.409542	1.21006	1.91615	2.93219	1.74003	4.13055	3.87595	2.28061
Solyc01g006930	4.31402	10.9248	10.0804	4.91695	4.74868	1.80293	2.1806	3.73376	2.44222	0.783437	7.29975	1.69564
Solyc01g006940	40.6681	34.2024	36.6098	37.2527	37.3676	24.0355	25.1568	21.6211	19.7599	11.3552	15.3357	15.9689
Solyc01g006950	0.119371	1.28475	0.185116	1.14051	1.66254	2.87457	8.48238	3.67918	4.27183	0.758551	1.51517	1.81048
Solyc01g006960	21.9754	25.5336	27.1385	30.8352	31.0364	25.2304	14.2517	18.4792	16.0048	20.7031	30.5034	29.3749
Solyc01g006970	32.4571	39.34	41.492	30.8842	28.8376	26.3101	20.9232	22.1056	25.1044	27.0846	46.2346	45.6838
Solyc01g006980	53.8761	40.7871	44.938	64.0507	63.718	37.0485	37.7476	35.3409	34.5185	46.6758	30.5004	31.348
Solyc01g006990	24.7015	25.455	26.0977	19.9672	21.6777	19.0183	16.0593	18.8528	19.5005	28.582	44.7741	40.3347
Solyc01g006993	0	0	0	0	0	0	0	0	0	0	0	0
Solyc01g006997	0	0	0	0	0	0	0	0	0	0	0	0
Solyc01g007000	0	0	0	0	0	0	0	0	0	0	0	0
Solyc01g007010	0	0	0	0.0794392	0	0	0	0	0	0	0	0
Solyc01g007020	0	0	0	0	0	0	0	0	0	0	0	0
Solyc01g007025	0	0	0	0	0	0	0	0	0	0	0	0
Solyc01g007030	0	0	0	0	0	0	0	0	0	0	0	0
Solyc01g007040	0	0	0	0	0	0	0	0	0	0	0	0
Solyc01g007050	0	0	0	0	0.0408962	1.00695	0.656034	0	0	0	0	0
Solyc01g007060	8.0212	9.1289	8.96642	7.28152	8.06833	10.4933	13.7932	7.4228	10.2417	7.76866	7.587	9.6772
Solyc01g007070	214.056	300.651	287.211	108.935	126.498	117.21	146.906	188.294	157.859	127.02	173.144	306.401
Solyc01g007080	0	0	0	0	0.0314518	0	0	0	0	0	0	0
Solyc01g007090	0	0	0	0	0	0	0	0	0	0	0	0
Solyc01g007100	6.74582	8.41003	8.64565	15.1207	13.4766	20.1582	14.3421	15.0512	13.0423	9.49767	6.52275	2.34029
Solyc01g007110	1.4911	0.849226	1.28387	1.03417	1.0022	1.20075	0.756189	0.93812	0.884226	1.0495	1.68404	1.36934
Solyc01g007120	1.61561	1.38967	2.03187	1.55749	1.82979	1.54237	1.22302	1.56114	1.4558	1.30039	2.51352	2.49688
Solyc01g007130	15.7431	25.9269	21.6725	11.1986	10.7741	10.5647	7.99097	9.39633	6.99837	3.33621	3.41216	3.47354
Solyc01g007140	4.57295	3.79858	5.05382	3.7612	3.58743	4.31837	4.48287	3.01179	3.78683	6.06778	7.4355	6.65907
Solyc01g007150	55.6541	48.3367	59.3838	67.5234	66.4272	49.0101	27.3301	25.7858	26.3172	34.0401	54.9692	42.6037
Solyc01g007160	0.40755	0.27913	0.303366	0.814174	0.908185	0.596307	0.379391	0.258615	0.689041	0.122675	0.0397924	0.126435
Solyc01g007170	0.0427437	0.230018	0.139199	1.74493	1.56766	1.03583	0.0198952	0	0.0722664	0	0.0208671	0.0442014
Solyc01g007180	11.3489	11.8443	13.7276	10.4489	8.92174	6.71126	10.7057	21.1932	16.885	10.8556	16.7691	17.9169
Solyc01g007190	5.04881	6.51165	7.42023	10.3154	9.74854	14.0083	12.7113	15.8628	12.4645	9.09532	14.0605	9.55203
Solyc01g007200	4.04073	1.60434	3.37831	19.4304	15.551	19.9751	0.981272	3.76915	2.67325	8.51988	7.49034	6.4192
Solyc01g007210	0	0	0.140454	0.131113	0	0.138041	0	0	0.255213	0	0.589546	0
Solyc01g007220	851.132	1425.48	1325.85	344.921	365.63	446.487	502.849	821.558	671.474	119.798	376.656	469.405
Solyc01g007230	18.5675	15.874	14.7603	23.0167	22.2613	20.1939	20.8926	17.4853	16.0769	17.9967	15.7528	22.5562
Solyc01g007240	0.0907914	0.266498	0.168955	0.236578	0.1686	0.166052	0.845183	0.0823036	0.1535	0.364384	0.531882	0.375551
Solyc01g007250	27.2356	22.8412	26.1901	20.8048	22.2402	23.2939	25.9764	20.5011	24.3083	36.0497	41.9067	34.3883
Solyc01g007260	0.075983	0.185859	0.0883737	0.115495	0.229289	0.121597	0.282932	0.241079	0.256928	0.038119	0	0.117861
Solyc01g007265	5.05898	5.27586	5.52458	4.60461	4.07847	3.49048	7.19105	7.49692	8.55317	7.2036	8.78461	10.5257
Solyc01g007270	0	0	0	0	0.542211	0.801024	0	0	0	0	0	0
Solyc01g007740	49.153	49.5976	62.7746	58.7907	55.977	40.9296	36.8237	33.8002	26.7513	82.5395	98.8451	114.309
Solyc01g007750	3.59436	4.03007	5.15218	5.33268	5.06919	4.06868	4.12373	4.36793	4.4838	2.6707	3.47153	2.51144
Solyc01g007760	12.4204	12.7395	12.9803	22.3579	21.2263	17.0646	14.4109	15.6379	14.1516	20.3186	27.1834	30.1555
Solyc01g007770	0	0	0	0	0	0	0	0	0	0	0	0
Solyc01g007780	0.0874221	0.307929	0.227759	3.61441	2.97088	3.64548	1.64391	1.29969	1.81799	0.578922	0.768216	1.55494
Solyc01g007790	12.5041	10.5324	13.8026	10.8607	10.8177	6.87275	7.76007	9.52029	9.93215	9.15431	10.19	12.4214
Solyc01g007800	0	0.221677	0	0.983947	1.05183	1.03593	0	0	0	0.113663	0.331821	0
Solyc01g007810	0	0	0	2.46908	1.80253	1.01445	0	0	0	0	0	0
Solyc01g007830	0.815163	0.656826	0.69155	0.957926	0.912707	1.55666	0.491014	0.76069	0.709362	0.625451	0.678864	0.793376
Solyc01g007840	29.139	28.0138	26.7753	35.3829	35.4684	30.6901	26.1135	29.6346	26.2256	27.2003	24.7705	27.5092
Solyc01g007850	6.1439	7.03909	9.55232	5.2676	5.50219	4.87532	3.17334	1.70679	2.63037	10.6785	11.9589	12.5839
Solyc01g007855	3.8939	4.06148	3.48638	2.2335	2.66045	2.38509	4.47977	4.82859	5.80703	4.45983	5.81049	6.41991
Solyc01g007860	170.878	132.108	152.61	142.758	154.997	122.845	119.863	133.985	123.277	111.805	109.302	81.4337
Solyc01g007870	1.2135	0.296831	1.22321	13.351	9.85898	12.4843	18.0745	0.6417	0.427429	0.101465	0.296211	0.418296
Solyc01g007880	7.35774	8.06902	8.61437	6.29991	6.89643	5.54856	4.05768	4.17263	4.43642	5.7555	6.67326	7.17595
Solyc01g007890	6.46152	6.74048	4.24388	22.7382	18.0427	18.0741	3.67096	5.38369	5.30156	2.66955	1.76278	10.7107
Solyc01g007895	0.596567	0	0.41631	0.777247	0.969348	0.545542	0.833022	0.540796	1.89114	0	0	0
Solyc01g007900	16.562	13.1953	11.5105	20.1689	19.8657	13.2291	11.6734	10.9998	11.8291	31.5734	34.5198	38.9723
Solyc01g007910	51.8538	46.4112	54.1703	52.8566	58.3101	47.604	79.2188	51.4899	49.6264	45.6006	61.8316	50.2682
Solyc01g007920	47.3095	54.4198	53.6218	25.193	28.1919	26.8717	56.7321	54.3592	65.2007	51.9916	94.1343	42.0141
Solyc01g007930	16.7514	21.9287	17.5572	21.942	16.5549	21.4109	13.2639	20.0377	16.5046	12.9438	19.1382	16.7652
Solyc01g007940	0	0	0	72.656	66.2207	75.4358	0	0	0.0287918	0	0	0
Solyc01g007950	0	0	0	0	0	0.0364102	0	0.0721869	0.033658	0	0	0
Solyc01g007955	0.746679	1.76554	2.40269	1.21603	1.03994	2.1907	1.2164	0.874296	1.4728	0.62432	0.334145	0.12869
Solyc01g007960	0	0.22876	0.0241717	0	0.217088	0.475127	0.894786	0.0706491	0.0219607	0.156393	0.101459	0
Solyc01g007970	0	0	0	0	0	0	0	0	0	0.0962975	0	0
Solyc01g007980	0	0.057815	0	0.0256621	0.192028	0.0540359	0	0	0	0	0	0
Solyc01g007990	8.44806	9.04463	7.71721	5.84347	6.93804	6.17569	7.5297	6.54096	6.51203	5.43624	11.4075	12.7192
Solyc01g008000	609.044	556.673	518.353	610.411	614.615	482.95	557.972	717.658	660.513	474.026	536.508	560.659
Solyc01g008005	0	0.422571	0	0.750259	0.53468	0	0.134016	0.261009	0	0.288892	0.702815	0.148873
Solyc01g008010	6.20943	8.27602	7.41536	8.79078	8.30772	6.93025	9.87675	7.97801	9.09296	19.6719	5.82408	13.7019
Solyc01g008020	16.0708	6.66852	11.7824	16.3805	13.1959	10.3759	2.16295	2.00096	2.5534	0.0388548	0.151241	0
Solyc01g008030	0	0	0	0.233342	0	0	0	0	0	0	0	0
Solyc01g008040	0	0	0	0	0	0	0	0	0	0	0	0
Solyc01g008050	0.09919	0.242625	0	0	0.092098	0	0	0.134876	0.0838498	0	0	0
Solyc01g008060	39.0932	38.9484	36.2749	32.312	32.055	28.8608	29.4793	28.8363	29.5464	20.2032	22.7974	25.6219
Solyc01g008070	27.4793	31.1961	32.186	22.9904	23.751	17.6642	18.9598	19.4154	18.7544	104.731	63.3273	98.4964
Solyc01g008080	34.6841	19.7232	20.7998	28.3315	25.0769	17.6982	27.7532	31.7372	33.5112	7.00372	15.1808	7.57815
Solyc01g008090	263.964	218.339	235.104	302.429	293.665	254.885	555.914	316.13	434.262	303.618	390.939	202.031
Solyc01g008100	48.7338	43.053	39.6216	40.7766	39.5871	22.9318	19.5267	21.5409	20.9762	19.3057	27.9234	29.1393
Solyc01g008110	69.5654	77.443	74.5412	117.421	124.421	94.8074	63.7442	61.4636	53.2242	117.339	106.798	118.051
Solyc01g008115	0	0	0	0	0	0	0	0	0	0	0	0
Solyc01g008120	20.0293	21.0636	23.7065	17.0349	17.648	17.5991	11.9283	10.2391	12.6946	25.6335	30.1872	29.2724
Solyc01g008130	9.1413	7.97577	12.2859	11.5367	9.30988	6.85902	3.22447	6.1147	4.33712	2.6131	1.34771	5.41329
Solyc01g008140	11.4489	17.3829	14.5334	10.2284	10.5354	11.8532	9.32563	8.5994	10.0239	10.7899	16.4883	24.461
Solyc01g008150	2.07307	1.62267	3.47203	1.4405	1.92485	0.379152	1.92983	2.63097	0	2.91204	5.6675	3.00128
Solyc01g008160	38.3653	25.2884	25.3012	33.3232	35.9972	26.8361	54.1356	39.1717	36.301	72.5308	57.1745	50.3925
Solyc01g008170	23.2847	28.6483	28.9567	22.9904	23.7218	21.8619	22.5791	22.4384	21.2188	29.3783	36.2396	37.4559
Solyc01g008180	7.89121	10.0908	7.70592	7.26131	9.89024	9.69313	5.01854	3.77742	4.00688	1.90756	2.61913	6.70601
Solyc01g008190	19.6063	27.6405	23.9315	21.6075	21.5322	21.5924	15.7004	16.6267	14.792	40.8249	31.2879	34.2276
Solyc01g008200	8.54907	9.46764	9.44056	8.24152	5.93156	8.07559	14.8673	11.497	14.6921	11.4998	9.90651	12.6295
Solyc01g008220	4.54345	8.08258	7.85104	10.0452	8.10847	2.80587	4.50417	4.6001	8.37989	0.355223	0.691346	0.366109
Solyc01g008230	161.036	214.112	212.025	139.656	134.739	117.234	129.762	181.312	172.442	106.664	183.789	221.323
Solyc01g008240	0	0	0	0	0	0	0	0	0	0	0	0
Solyc01g008250	4.56117	4.8246	4.41602	6.42442	6.23811	4.62197	4.07388	8.26951	8.70151	3.95803	4.69416	3.50567
Solyc01g008260	32.1814	24.7437	26.8128	13.5282	13.9577	13.2008	23.7946	29.9108	24.2684	28.2056	30.5206	30.3046
Solyc01g008270	32.7261	37.9701	34.3003	45.1426	42.6688	39.7307	51.7087	40.9195	47.804	27.9294	36.5441	38.4452
Solyc01g008280	57.5105	60.5359	70.3374	43.6933	49.4778	32.1929	46.9997	43.3549	37.3255	54.4798	71.4338	65.4997
Solyc01g008290	10.9929	11.1175	13.544	10.2781	11.2682	9.86819	10.4524	9.02047	9.54854	5.80159	15.9193	13.4884
Solyc01g008300	1.36929	0.907568	1.19187	0.613849	0.574173	0.929029	0.246712	0.120124	0.373394	0.132956	0.345018	0.182708
Solyc01g008310	80.7185	86.1147	91.5619	76.743	79.9908	66.2315	61.8036	64.68	63.0886	97.3136	135.282	104.855
Solyc01g008320	21.8076	26.4816	26.1854	19.3405	18.1603	20.0872	15.8043	14.0263	17.6451	39.9956	50.2084	43.1374
Solyc01g008330	64.6299	33.1302	48.1857	110.516	106.133	52.4686	47.9046	33.9561	37.0932	115.793	39.9403	45.9599
Solyc01g008340	23.6963	20.4229	22.8842	17.0155	19.3809	15.8023	23.811	17.9525	22.7073	20.7716	32.7003	27.3353
Solyc01g008350	0.0955332	0	0.177779	0.331912	0.354811	0.262086	0.0889325	0	0	0	0	0.197582
Solyc01g008360	92.5223	85.655	86.1593	64.2636	79.3644	62.1258	99.7477	99.564	98.9968	104.283	106.565	97.42
Solyc01g008370	145.414	163.686	150.863	140.83	140.596	138.389	125.724	134.421	128.232	154.54	256.509	126.4
Solyc01g008390	0.171801	1.34476	0.159854	0.547151	0	3.14214	4.95786	0.726788	0.774568	0.574593	1.28604	1.53972
Solyc01g008400	1.02811	1.46766	1.01934	1.20042	0.657265	0.631919	1.88277	2.04733	1.36777	1.16684	7.45464	7.1459
Solyc01g008405	0	0	0	0	0	0	0	0	0	0	0	0
Solyc01g008410	0	0.112529	0	0	0	0.0262935	0.0535322	0	0	0	0.0561472	0
Solyc01g008415	0	0	0	0	0	0	0	0	0	0	0	0
Solyc01g008420	3.73515	6.88336	5.26371	6.48854	4.10784	2.25501	2.76816	3.45171	1.99259	0.545779	11.6135	7.76257
Solyc01g008430	0	0	0	0.834369	0.230176	0	0	0	0	0	0	0
Solyc01g008440	13.4604	18.1453	16.1193	13.7266	12.6832	11.6709	10.8597	18.0093	15.5298	24.0349	26.504	21.2401
Solyc01g008450	0.0745709	0	0	0	0.138478	0	0	0.0675995	0	0	0	0
Solyc01g008460	26.4347	19.4433	24.8817	22.641	16.7428	19.9111	32.5446	26.6878	25.6647	19.9387	37.0687	31.3954
Solyc01g008470	14.5042	9.93386	8.95611	15.3848	16.1606	11.0128	10.0242	8.64595	9.62305	10.0106	8.19656	8.22662
Solyc01g008471	0	0	0	0	0	0	0	0	0	0	0	0
Solyc01g008472	0	0.18781	0	0	0	0	0	0	0	0	0	0
Solyc01g008474	0	0	0	0	0	0.309091	0	0	0	0	0	0.116509
Solyc01g008476	0	0	0	0	0	0	0	0	0	0.100972	0	0.728465
Solyc01g008478	0	0.18356	0	0	0.174194	0	0	0.510208	0.634375	0	0	0.194006
Solyc01g008480	12.274	12.3041	15.5247	10.4944	11.1166	8.2929	6.80968	6.43255	6.60068	14.4594	18.324	17.424
Solyc01g008485	18.689	20.8981	23.5268	13.2318	13.7073	11.3458	28.9475	40.4327	51.6445	23.0063	30.8216	25.9851
Solyc01g008490	14.8319	19.0585	15.5181	11.1687	10.698	9.37207	13.2145	15.5227	19.2645	22.0351	23.2451	24.8826
Solyc01g008493	23.5117	22.1386	27.0517	14.0536	15.8448	15.2585	12.944	12.0319	13.9983	37.7956	39.4948	38.8231
Solyc01g008497	0.0653828	0.089561	0.0730031	0.011358	0.0242832	0.119581	0.486922	0.0237081	0	0.0787226	0.0510708	0.0405675
Solyc01g008500	0	0	0	0	0	0	0	0	0	0	0	0
Solyc01g008510	0.178713	0.174857	0	1.70749	1.65935	10.7862	181.172	40.6634	100.464	122.829	31.2341	14.2302
Solyc01g008520	4.99097	6.79082	5.58717	6.5703	6.37191	6.63218	6.27952	5.76151	4.97721	2.89508	4.87309	1.8548
Solyc01g008530	2.0926	4.29965	2.02496	7.12494	7.0336	7.11866	0.701286	1.70727	2.93649	0.16797	0.367772	0.0432793
Solyc01g008540	0	0	0	0.334038	0.255059	0	77.0741	0.149412	21.689	304.342	65.2292	0
Solyc01g008550	22.3572	15.5381	14.6112	58.0258	50.0845	47.2993	19.4085	6.99698	17.6246	2.44796	1.64585	1.65141
Solyc01g008560	12.6461	10.8789	10.374	12.6026	13.6989	11.3969	9.69657	8.05795	7.1269	11.8611	13.7194	14.7516
Solyc01g008570	0	0	0	0	0	0	0	0	0	0	0	0
Solyc01g008580	0	0	0	0	0	0	0	0	0	0	0	0
Solyc01g008590	0	0	0	0	0	0	0	0	0	0	0	0
Solyc01g008600	7.68407	6.57518	7.45287	7.28739	7.94142	5.42532	4.29695	3.11365	4.33811	4.84931	7.75444	6.48606
Solyc01g008610	0	0	0	0	0	0	0	0	0	0	0	0
Solyc01g008620	0.0506038	0.74268	0	0.0879067	0.798757	0.370205	5.37025	0.045873	0.513333	0.406189	0	0
Solyc01g008640	0	0	0	0	0	0	0	0	0	0	0	0
Solyc01g008650	0	0.0323328	0	0.0574056	0	0	0	0	0	0	0	0
Solyc01g008660	6.88556	8.91022	7.02672	7.13818	6.87446	6.46589	5.23812	6.71166	7.2289	7.16866	16.229	10.604
Solyc01g008670	0.172182	0.404321	0	0.0598214	0	0.062982	0.160285	0.156085	0.43666	0.17276	0	0.142443
Solyc01g008680	0.791868	0.357592	0.566769	0.89943	0.169673	0.835545	0.907268	0.220874	0.61791	7.15073	7.96955	10.7713
Solyc01g008690	0.0392875	0.153759	0	0	0.0364785	0	0.109719	0	0	0	0	0
Solyc01g008700	20.9465	38.0484	34.5912	13.0127	11.592	14.0385	87.9402	48.33	73.4861	52.5187	22.4834	45.7125
Solyc01g008710	0	24.8114	6.10746	0	0	0.0863671	759.977	294.004	685.575	1047.59	178.297	585.947
Solyc01g008720	0	0	0	0.0844042	0	0	0	0	0	0	0	0
Solyc01g008730	27.9939	25.5981	22.2218	16.0043	18.8089	19.7893	19.6927	21.7177	22.3376	33.3379	39.1198	36.6399
Solyc01g008740	0	0	0	0.0506267	0	0.0355344	0	0	0	0.0194941	0.0189701	0
Solyc01g008760	6.58118	8.31728	7.70541	5.57336	6.67077	5.86782	6.89227	8.79974	9.50409	4.07201	4.33737	4.87736
Solyc01g008770	21.3495	21.4398	22.3002	23.9363	24.6835	19.7183	10.1851	10.5528	12.6964	11.5274	8.95917	13.4858
Solyc01g008780	40.3833	47.333	43.2929	40.0926	37.882	34.6476	63.4437	57.467	59.6045	66.3414	49.941	85.3844
Solyc01g008790	24.7633	26.7573	25.7475	14.8358	13.5998	8.24427	3.53821	5.63044	3.693	0.0813873	0.147084	0.287593
Solyc01g008800	0.73063	1.20228	1.46264	0.355766	0.390589	0.799741	0.0412211	0.130458	0.093581	0.422077	1.64292	0.93871
Solyc01g008810	1.27987	2.27261	0.793909	2.96444	3.08093	2.68758	4.10384	4.38304	4.60822	1.2366	2.1753	1.56861
Solyc01g008820	28.7315	31.1672	33.2093	52.2361	55.1771	47.0404	55.3201	34.4981	47.4824	48.4345	55.3653	43.0445
Solyc01g008830	2.87082	2.86138	1.99714	2.65666	1.64418	1.76654	2.54758	3.25912	3.67427	0.349961	0.340553	0.749117
Solyc01g008840	50.8526	55.3714	59.072	40.5824	42.9273	37.7658	45.6123	43.497	46.9525	64.4024	95.1684	79.6585
Solyc01g008850	83.8208	67.9294	85.1177	47.7678	49.2051	62.8908	79.3549	68.5885	79.6415	93.215	117.764	148.127
Solyc01g008860	0	0	0	0	0.0468333	0	0	0	0	0	0	0
Solyc01g008870	0	0	0	0	0	0	0	0	0	0	0	0
Solyc01g008880	0.115171	0.338057	0.107161	2.70093	2.56646	0.737239	0.107213	0.208807	0.292077	0	0	0
Solyc01g008890	21.1853	31.1637	26.917	20.3892	22.9716	24.5395	28.5622	27.7254	35.0767	17.2005	43.1767	34.8509
Solyc01g008900	6.83633	6.72499	6.08585	6.54772	6.72496	4.79853	5.29759	5.66125	5.06058	3.93017	4.97909	6.22878
Solyc01g008910	1.97227	3.82726	2.63032	2.42684	3.08261	3.48691	6.70138	4.79749	4.75165	7.81659	3.33785	9.0419
Solyc01g008920	5.38506	7.02516	7.56497	11.8309	12.4511	14.0975	9.63279	6.12596	6.96224	6.14473	1.13405	3.49409
Solyc01g008925	7.02278	11.2979	12.3777	17.0091	17.9945	15.0055	15.3381	22.6491	19.4084	5.55577	2.04389	6.28467
Solyc01g008930	13.2229	17.0128	13.0558	16.5077	16.5952	8.17222	11.9329	14.9926	15.6901	3.89498	4.1456	8.23776
Solyc01g008940	0	0.64907	0	41.4863	47.7362	94.6362	0	0	0	0	0	0
Solyc01g008950	407.381	471.152	407.36	398.922	403.18	375.606	536.987	570.573	551.552	422.215	435.22	353.259
Solyc01g008960	200.172	220.063	217.248	316.137	308.068	263.399	81.2741	113.983	109.616	85.4405	135.391	114.509
Solyc01g008970	278.94	260.795	260.132	275.272	268.505	230.798	158.01	180.319	173.123	162.497	261.22	211.323
Solyc01g008973	0	0.166485	0.0791616	0	0.236985	0	0	0	0	0.0853636	0.0830687	0.175959
Solyc01g008977	1.62594	1.32571	0.882505	1.4711	0.566132	1.79663	0.945997	0.859795	1.43175	2.10722	2.05057	1.40116
Solyc01g008980	7.15949	7.47202	6.39514	4.10426	6.20442	5.10676	4.9764	7.61514	7.50478	4.45378	6.57097	5.37999
Solyc01g008990	22.5961	23.3483	22.3511	22.9281	23.6276	20.1806	24.3277	26.131	30.3928	30.6707	37.836	33.7398
Solyc01g009000	65.4414	64.411	72.2583	66.4932	65.0466	54.3173	62.7348	69.5741	60.5945	54.9022	53.2359	59.2729
Solyc01g009010	24.8928	26.3463	28.5809	16.4239	18.0755	12.987	21.6503	18.6601	20.3011	132.246	51.3752	77.9265
Solyc01g009015	0	0	0	0	0	0	0	0	0	0	0	0
Solyc01g009020	830.823	620.093	636.538	441.252	491.577	287.905	458.919	473.121	684.808	240.46	124.116	207.545
Solyc01g009030	21.2293	17.5139	22.5363	15.5896	16.5755	13.9424	14.4176	10.4752	15.5397	31.273	28.5715	33.8779
Solyc01g009040	0.212987	0.486247	0.429379	3.45325	4.87804	0	0	0	0.180047	0	0	0
Solyc01g009050	28.4684	32.8986	35.1096	20.7465	21.3915	21.1593	15.4186	17.9046	18.2966	34.0368	40.2714	46.1808
Solyc01g009060	21.6895	22.0256	21.7377	21.3118	20.6565	22.894	17.3221	15.9902	17.4171	28.1525	30.5765	30.5935
Solyc01g009070	13.1862	16.2787	17.1069	16.9109	14.8113	17.5818	17.1152	26.3137	27.7551	5.08352	11.6651	11.9429
Solyc01g009080	9.22543	4.74663	5.40192	47.1109	42.5337	31.6364	41.3853	31.7937	22.1859	2.3141	0.388256	0.411209
Solyc01g009090	40.3525	49.9171	52.2406	45.4858	42.9184	41.6971	36.3074	37.8218	42.3006	56.7655	83.1744	77.204
Solyc01g009100	88.4606	62.7502	72.1708	114.268	118.145	80.8944	189.1	90.4101	100.132	95.793	80.8414	64.2015
Solyc01g009120	12.0497	12.9998	13.8421	8.25626	8.10405	7.75537	10.5264	11.5959	14.9357	14.8556	23.3577	24.2636
Solyc01g009140	0	0	0	0	0	0	0	0	0	0	0	0
Solyc01g009150	27.3268	29.2517	28.1365	25.8933	28.7932	16.5291	14.5934	17.3172	14.8452	15.987	22.0812	21.9692
Solyc01g009160	0.811202	1.37575	0.905746	2.53653	2.10896	2.12655	3.77576	2.59829	2.46868	1.13949	1.10886	2.62845
Solyc01g009170	34.396	68.2644	50.1342	51.1676	48.1482	83.4091	19.6343	17.3787	24.2058	20.9521	38.5956	27.2635
Solyc01g009180	22.2692	24.1369	25.337	20.0841	19.1342	17.1779	21.4179	17.5514	22.3951	40.7515	42.3823	36.0344
Solyc01g009190	0	0	0	0.154671	0.206677	0.122132	0	0	0	0	0.0434669	0
Solyc01g009200	0.39676	0.0485249	0	0.0430771	0.276294	0.0453531	0	0	0	0	0	0
Solyc01g009210	0	0	0	0	0	0	0	0	0	0	0	0
Solyc01g009215	0	0	0.0531379	0	0.106052	0	0	0	0	0	0	0
Solyc01g009220	0.29757	0.145575	0	0.581541	0.483514	0	0.0692524	0	0	0	0	0.0769295
Solyc01g009230	14.352	10.6098	14.2442	12.7429	12.1413	9.91627	0.890693	0.289118	2.42648	0	1.2456	1.31924
Solyc01g009235	5.30298	5.56329	6.7434	4.15824	5.38885	3.61011	2.93452	2.93774	3.41194	0.487737	0.776659	0.944436
Solyc01g009240	0	0.109012	0.0414669	0.348383	0.0827595	0.0407544	0	0	0	0	0	0
Solyc01g009245	9.21365	5.40891	8.78723	16.2056	16.1473	8.00431	9.8636	5.6378	5.54946	0	0	0
Solyc01g009250	1.96217	2.33719	1.90509	1.55609	0.396059	1.56029	1.50892	2.16541	1.00965	1.19837	1.08286	2.20552
Solyc01g009260	0.043921	0	0	0	0	0	0	0	0	0	0	0
Solyc01g009270	0	0.128376	0.284859	0	0	0	0.814276	0.594704	1.40493	0	0.170811	0.226136
Solyc01g009280	31.7133	37.3573	40.6057	29.5993	28.4449	25.5347	17.8201	20.2847	20.8708	30.2845	40.0974	42.0543
Solyc01g009290	12.8068	16.8551	16.0815	15.2335	16.2845	13.1105	13.1879	11.9948	14.8021	20.2696	27.5537	24.0551
Solyc01g009300	25.8283	13.9337	31.7312	20.2519	18.9229	8.55747	10.7137	19.0299	18.4095	3.82817	2.77478	5.03334
Solyc01g009303	0	0	0	0	0	0	0	0	0	0	0	0
Solyc01g009307	0.0505011	0	0	0	0.0234452	0	0	0	0	0.0506705	0	0
Solyc01g009310	131.723	158.581	148.565	108.778	112.05	142.995	121.172	121.021	111.069	58.8308	160.059	104.058
Solyc01g009320	0	0	0	0	0	0	0	0	0	0	0	0
Solyc01g009330	0	0	0	0	0.0450784	0.133191	0	0	0	0	0	0
Solyc01g009335	0	0	0	7.04895	5.44628	0.073479	0.299199	0.0728398	0.407549	0	0	0
Solyc01g009340	0.346336	0.145227	0.276215	0.880973	0.757995	0.701295	0.529668	0.134554	0.794672	0	0	0
Solyc01g009350	0	0	0	0	0	0	0	0	0	0	0	0
Solyc01g009360	0	0	0	0	0	0	0	0	0	0	0	0
Solyc01g009370	0	0	0	0	0.0841361	0.248594	0	0	0	0	0	0
Solyc01g009380	13.7755	13.8251	14.2547	7.83007	9.68694	6.87753	8.01479	7.98841	9.46158	9.40077	20.0268	17.8851
Solyc01g009390	13.2196	16.6089	16.0742	14.8312	13.4832	14.8364	20.5103	20.6538	23.6201	25.4225	36.8153	29.6192
Solyc01g009400	0	0	0	0	0	0	0	0	0	0	0	0
Solyc01g009410	0	0	0	0	0	0	0	0	0	0	0	0
Solyc01g009420	325.569	379.73	372.765	374.835	346.895	271.907	239.952	303.767	235.476	166.453	166.498	291.744
Solyc01g009430	217.921	295.543	362.428	174.348	116.825	245.387	437.481	630.932	565.601	101.894	36.9737	317.335
Solyc01g009440	0	0	0	0	0	0.104738	0	0	0	0	0	0
Solyc01g009450	112.631	104.3	107.271	93.9668	99.6904	80.9397	110.795	125.495	118.108	81.5261	104.133	110.976
Solyc01g009470	0.0184656	0	0	2.53413	3.12045	25.4813	0	0	0	0	0	0
Solyc01g009480	0	0	0	0	0.0306993	0.0907061	0.0307789	0	0	0.0995228	0	0
Solyc01g009490	0	0	0	0	0	0	0	0	0	0	0	0
Solyc01g009500	4.66927	6.91625	5.9436	6.30875	5.69024	8.74737	6.45961	6.14338	6.16742	2.92809	3.38758	6.84039
Solyc01g009510	0	0	0	13.8319	13.705	13.0594	0	0	0	0	0	0
Solyc01g009520	228.135	164.021	188.884	240.495	246.124	166.77	282.075	233.672	250.072	128.731	212.531	127.538
Solyc01g009530	0	0	0.0897165	0	0.0895278	0	0	0	0	0.0967454	0	0
Solyc01g009540	0	0	0	0.187565	0	0	0	0	0	0	0.210845	0
Solyc01g009550	0	0	0	0	0	0	0	0	0	0	0.230012	0
Solyc01g009560	0	0	0	0	0	0	0	0	0	0	0	0
Solyc01g009565	0.366915	0	0.512098	0	0	0	0.170782	1.16415	0.155085	0	0	0
Solyc01g009570	0	0	0.205203	0	0	0.100838	0.205302	0	0	0	0	0
Solyc01g009580	0.411528	0.100662	0	0.0446805	0.238815	0.0470411	0.0478867	0	0.260912	0	0	0
Solyc01g009590	0	0	0	0	0	0	0	0	0	0	0	0
Solyc01g009600	0	0	0	0	0	0	0	0	0	0	0	0
Solyc01g009610	37.458	32.054	29.5421	32.122	31.633	22.4011	12.1214	13.5825	10.9068	7.63604	10.7978	8.60787
Solyc01g009620	20.0173	17.7993	19.5038	22.9087	23.9632	16.8661	25.1386	26.3059	20.5932	32.9057	27.5344	32.482
Solyc01g009630	18.2304	21.646	18.6853	20.3704	21.1146	15.9765	29.7872	25.4777	29.2969	38.8695	66.1466	39.8643
Solyc01g009635	0	0	0	0	0	0	0	0	0	0	0	0
Solyc01g009640	0	0	0	0	0	0	0	0	0	0	0	0
Solyc01g009645	0	0	0	0	0	0	0	0	0	0	0	0
Solyc01g009650	0	0	0	0	0	0	0	0	0	0	0	0
Solyc01g009660	0	0	0	0.291363	0.373757	18.8349	0	0	0	0	0	0
Solyc01g009670	1.17951	1.18903	0.731653	1.33494	1.59298	0.751766	1.06474	1.16644	0.785586	0.071725	0.732867	0.332654
Solyc01g009680	0	0	0.021012	0.0392293	0.0419357	0.0413019	0.168177	0	0.01909	0.0226582	0	0
Solyc01g009690	0.0480991	0.0235307	0	0.188	0.17864	0	0.0447757	0.17441	0.0203302	0	0	0
Solyc01g009695	0	0	0	0	0	0	0	0	0	0	0	0
Solyc01g009700	0	0	0	0.397928	0.451967	0.0261845	0.213241	0	0.145232	0	0	0
Solyc01g009710	0.363697	0	0.169202	2.84309	3.71462	3.1596	9.47989	4.1212	5.53409	0	0	0
Solyc01g009715	0	0.175783	0	0.104032	0.0278023	0.0547643	0.0278744	0.244295	0.10125	0	0	0
Solyc01g009720	0	0	0	0.0764596	0	0	0	0	0	0	0	0
Solyc01g009730	0	0	0	0	0	0	0	0	0	0	0	0
Solyc01g009740	0	0	0	0	0	0	0	0	0	0	0	0
Solyc01g009750	249.425	273.398	281.797	177.463	184.555	155.733	252.306	338.4	317.726	221.699	324.427	337.493
Solyc01g009760	4.24791	4.15626	2.09977	1.21066	2.21861	2.12438	8.40312	8.66428	16.4959	1.59831	0.64806	1.78457
Solyc01g009770	1.61119	0.394108	0.562181	3.63856	3.10419	1.76806	2.21231	0.803313	2.21328	4.00109	1.57314	0.58315
Solyc01g009780	56.7204	62.9616	61.4524	44.9152	50.6614	53.9128	64.9974	78.9431	77.7207	95.4183	99.4747	97.7049
Solyc01g009790	0	0	0	0	0	0	0	0	0	0	0	0
Solyc01g009810	0	0	0	0.106127	0	0.633161	4.09474	0	0.068859	0.204325	0	0
Solyc01g009820	12.9637	18.2668	17.349	11.0318	13.0121	14.7149	13.0458	14.154	13.865	22.2056	25.8278	25.824
Solyc01g009830	1.89098	3.85454	5.08292	0.136872	0.243857	1.393	0.880161	0.380932	0.222018	0.105407	0	0
Solyc01g009840	0	0	0	0	0	0	0	0	0	0	0	0
Solyc01g009845	0	0	0	0	0.13367	0	0	0	0.121699	0	0	0.297746
Solyc01g009850	3.32391	3.73717	2.95711	3.5202	2.8426	2.34637	6.05279	4.3876	5.20069	2.92549	3.92865	3.85939
Solyc01g009860	63.9167	74.8764	79.2288	51.4909	56.8948	76.9803	62.9119	90.7715	127.835	28.0641	49.1469	128.793
Solyc01g009870	20.2764	9.05077	18.0979	16.4997	15.7976	8.8368	3.65208	6.66353	4.3637	0.87013	1.81444	1.96441
Solyc01g009880	0	0	0	0	0	0	0	0	0	0	0	0
Solyc01g009890	0	0	0	0	0	0	0	0	0	0	0	0
Solyc01g009900	0	0	0	0	0	0	0	0	0	0	0	0
Solyc01g009910	0	0	0	0	0	0	0	0	0	0	0	0
Solyc01g009920	0	0	0	0	0	0	0.196064	0.0272753	0.101739	0.0301891	0	0.0311142
Solyc01g009930	0	0	0	0	0	0.119732	0	0	0	0	0	0
Solyc01g009935	0	0	0	0	0	0	0	0	0	0	0	0
Solyc01g009940	0	0	0	0	0	0.062156	0	0	0	0	0	0
Solyc01g009960	0	0.0304556	0	0	0	0	0.0289765	0	0	0	0	0
Solyc01g009970	23.9406	24.3837	25.2624	18.1998	19.2485	15.8999	22.079	20.1263	18.6929	24.7367	18.8917	25.2181
Solyc01g009980	0	0	0	0	0	0	0	0	0	0	0	0
Solyc01g009990	79.7757	62.969	70.722	103.599	120.276	62.4174	92.366	80.1305	79.8126	111.678	120.136	110.891
Solyc01g010000	8.80629	8.79505	8.70387	9.80715	9.53377	12.4973	8.572	6.65803	8.1857	17.9283	9.95404	19.0445
Solyc01g010020	7.93397	5.75949	4.88179	5.33518	4.75271	8.77666	3.09727	3.59613	3.56983	1.28397	0.49978	5.42559
Solyc01g010030	2.02627	2.18549	1.85567	3.54766	3.42206	3.10772	2.48037	1.37401	2.3468	1.82496	2.1965	1.6499
Solyc01g010035	0.936225	0	0	0.116169	0.124184	0	0.124505	0	0.113062	0	0.130588	0
Solyc01g010050	38.9406	39.9827	37.0967	29.2997	27.1943	32.425	31.8346	23.6938	35.582	30.4516	37.3084	28.1606
Solyc01g010055	0.427437	1.04554	1.7897	0.556894	1.38907	3.5179	0.99476	0.581216	1.26466	1.92992	3.13006	1.10504
Solyc01g010060	0.620149	1.56026	0.824318	0.846447	5.84035	6.56224	19.7107	7.79012	10.9342	4.00005	2.16251	2.56519
Solyc01g010080	0	0.028488	0.108365	5.26025	6.40715	12.7271	0	0.0263942	0.172292	0	0	0.0301091
Solyc01g010083	0	0	0	0	0	0	0	0	0	0	0	0
Solyc01g010085	0	0	0	0	0	0	0	0	0	0	0	0
Solyc01g010087	0	0	0	0	0.522583	0.0428905	0	0	0	0	0	0
Solyc01g010090	0	0	0	0.199331	0.0710276	0	0	0	0	0	0	0
Solyc01g010130	0	0	0	0	0	0	0	0	0	0	0	0
Solyc01g010135	3.16053	3.81388	4.85221	3.59921	3.68449	4.60827	2.46814	2.14879	2.99828	0.863252	4.21737	2.16072
Solyc01g010140	0	0	0	0.0363762	0	0	0	0	0	0	0	0
Solyc01g010150	1.58596	1.72908	1.8762	1.84982	2.18781	4.53739	8.94262	5.01137	4.23272	6.95615	8.2734	12.6986
Solyc01g010160	0	0	0	0	0	0	0	0	0	16.9164	0.335951	4.26975
Solyc01g010170	0	0	0	0	0	0	0	0	0	19.9278	0.926188	4.23032
Solyc01g010180	22.2836	22.4105	22.1065	38.3728	52.699	90.8118	21.1053	15.9069	7.02297	1.09065	0.606474	0.80291
Solyc01g010190	24.4979	28.4056	21.7868	28.2143	27.0819	29.5194	37.7987	54.8443	51.6013	12.0863	10.5721	21.7643
Solyc01g010200	337.759	393.539	341.678	245.324	286.769	258.857	334.206	559.034	531.881	34.6497	39.287	85.643
Solyc01g010210	0	0	0	0	0	0	0	0	0	0	0	0
Solyc01g010220	10.465	12.9453	8.62443	9.60909	10.6885	14.2182	24.9812	17.4826	26.7292	4.57506	5.18191	4.94716
Solyc01g010230	59.0028	81.868	52.8048	29.9017	40.9357	84.6658	128.539	127.552	152.091	28.518	40.0242	79.9306
Solyc01g010240	0	0	0	0	0	0	0	0	0	0	0	0
Solyc01g010250	14.0984	21.47	21.4754	4.59208	6.01735	16.1677	58.8476	40.0933	67.1349	38.1592	84.1466	34.7432
Solyc01g010260	0	0	0	0	0	0	0	0	0	0	0	0
Solyc01g010270	186.5	195.883	171.193	158.089	175.993	129.06	94.6021	153.677	137.258	47.6598	84.0612	81.946
Solyc01g010280	0.0873485	0	0	0	0.0405516	0.0798774	0	0	0	0	0	0
Solyc01g010290	20.5002	21.2179	22.3839	20.7665	14.6772	18.3854	12.5079	13.031	17.5803	7.18675	6.17361	6.69183
Solyc01g010295	5.11537	7.83678	6.76369	5.90464	6.74947	7.81692	2.19299	1.28132	1.13796	3.37667	2.03725	1.53126
Solyc01g010300	0	0	0	0	0	0	0	0	0	0	0	0
Solyc01g010310	74.8609	43.9474	54.4737	107.537	98.0247	38.4418	32.7	22.0988	26.2869	1.15557	4.12318	1.38948
Solyc01g010315	0	0	0	0	0	0	0	0	0	0	0	0.122735
Solyc01g010350	0.154195	0	0.0956481	1.0268	0.620406	0.188009	0.191389	0	0.0434494	0	0	0
Solyc01g010360	4.23043	2.66428	2.80513	1.52046	0.722382	5.33599	0.0905317	0.837515	0.123316	1.21972	0.522248	3.36902
Solyc01g010370	4.12347	3.97211	4.86511	3.67386	3.33526	3.86797	1.54334	1.73411	2.21004	0.853052	1.43196	0.747315
Solyc01g010390	5.43597	9.00744	8.75621	32.3655	26.3762	15.795	3.99933	6.94127	11.3893	0.615797	2.79646	3.62668
Solyc01g010393	0	0	0	0	0	0	0	0	0	0	0	0
Solyc01g010397	0	0	0	0	0	0	0	0	0	0	0	0
Solyc01g010400	0	0	0	0	0	0	0	0	0	0	0	0
Solyc01g010410	3.79317	4.92266	4.16663	1.80749	1.66315	2.26431	2.50118	2.45952	2.64985	0.925043	1.56888	1.82506
Solyc01g010420	0	0	0.159414	0.297624	1.19309	5.4836	0.15949	0	0.796573	0.0859515	0.250922	0.265756
Solyc01g010430	7.18701	14.9029	13.5264	34.1208	27.7163	29.2392	24.899	34.5005	36.3149	14.5042	32.6542	30.3619
Solyc01g010440	86.7176	81.4091	84.9305	77.551	72.8327	55.3899	50.3791	66.4225	49.7467	44.0636	100.238	91.0025
Solyc01g010460	4.67922	5.04188	5.42849	3.49835	3.62971	3.27695	2.39851	1.74503	2.10295	2.46632	4.51087	3.49128
Solyc01g010465	0.727866	1.18694	0.902998	0.632208	1.72711	0.813524	0.752861	0.806447	1.09386	0.730308	1.02653	0.752689
Solyc01g010470	2.04255	1.51609	2.03158	0.917645	1.76572	1.67462	0.917928	0.893875	1.30988	0.565352	2.40692	1.16536
Solyc01g010480	39.1858	65.0727	70.9208	5.62912	6.99479	8.26415	21.4727	26.8804	24.9395	2.1273	6.871	9.4697
Solyc01g010490	6.69178	11.3398	11.7467	2.15715	3.13869	5.80398	66.6612	32.9262	54.8482	6.57579	1.78499	26.6455
Solyc01g010493	0	0	0	0.245539	1.04992	0.344683	0	0	0	0	0.0920049	0
Solyc01g010497	0	0	0	0	0	0	0	0	0	0	0	0
Solyc01g010500	0	0	0	0	0	0	0.0384685	0	0.0698655	0	0	0
Solyc01g010502	0.0996669	0.195033	0.185472	0	0.0925408	0	0	0	0.0842529	0	0.0973129	0.309197
Solyc01g010504	0	0	0	0	0	0	0	0	0	0	0	0
Solyc01g010506	0.106859	0	0	1.48505	1.78594	2.83386	0.198952	0	0	0	0	0
Solyc01g010508	0.147026	0	0	1.91556	1.77468	4.30243	0.136868	0.133281	0.870016	0	0.430661	0.15204
Solyc01g010510	1.56056	1.22652	1.2378	1.64434	1.2352	1.56745	0.547752	0.950842	1.18945	0.924076	1.54868	1.29631
Solyc01g010520	14.2322	10.2659	10.1493	8.12085	9.03478	3.83163	3.15908	4.92836	3.68836	0.0694886	0.236672	0.250663
Solyc01g010525	0.180267	0.529133	1.34185	1.09603	0.669512	0.494546	0.335623	0	0.609552	0	0	0
Solyc01g010530	0.0423076	0	0	0	0	0.0773779	0.0787688	0	0	0	0	0
Solyc01g010540	120.391	104.179	92.7675	126.009	126.445	96.1525	177.064	127.728	140.64	96.0899	145.251	85.0834
Solyc01g010550	0	0	0	0	0	0	0	0	0	0	0	0
Solyc01g010570	32.0734	35.0758	35.1749	34.6491	31.6775	32.6612	28.0791	42.2835	36.8392	19.1214	52.1786	29.9515
Solyc01g010580	548.77	460.398	426.547	436.076	417.955	365.414	439.696	545.836	508.658	231.804	449.606	241.457
Solyc01g010590	40.0109	43.8193	43.6393	37.2724	37.0379	37.6941	26.3875	42.2972	38.6257	27.2283	43.7278	36.0628
Solyc01g010600	0	0	0	0	0	0	0	0	0	0	0	0
Solyc01g010640	15.0096	15.5159	18.945	24.3736	22.2983	25.7807	45.259	36.2049	47.2778	85.9729	34.4077	27.3989
Solyc01g010650	69.9122	78.8691	75.6045	72.5244	66.8357	42.9109	43.2808	52.4683	45.2456	45.2211	76.3041	56.5527
Solyc01g010660	10.5462	10.0201	9.78125	9.92601	9.22542	6.29507	9.78597	9.12991	13.9031	13.6778	13.6743	16.3413
Solyc01g010670	0	0	0	0	0	0.182284	0	0	0	0	0	0
Solyc01g010690	0.108823	0.266187	0.0506274	0.141781	0.0505209	0.447817	0.151955	0	0	0	0.159379	0.0562669
Solyc01g010700	20.6864	18.9059	21.3211	20.8564	23.1908	25.4255	32.1364	18.9333	26.6524	32.6353	61.2753	26.0348
Solyc01g010710	3.09106	1.08877	3.56636	1.07393	2.98485	0	0.115099	0.560417	0.418082	0.124057	0	0
Solyc01g010720	1.49099	0.667598	2.04569	1.66819	2.5576	0.57774	0.2823	0.114543	0.128177	0	0	0
Solyc01g010740	0	0	0	0	0	0	0	0	0	0	0	0
Solyc01g010750	379.071	370.059	374.989	279.635	282.565	207.235	258.67	303.514	315.86	476.351	333.912	363.9
Solyc01g010760	5.77553	6.88589	5.72977	6.71081	7.84855	6.78555	8.43858	6.89989	5.52898	29.7037	29.3533	16.9682
Solyc01g010770	2.45702	5.67754	6.3396	1.60437	1.44	2.66118	3.89319	4.92853	6.20162	2.76249	2.46704	0.919016
Solyc01g010780	27.0928	28.4922	28.2819	20.9901	23.8552	20.3786	21.173	20.4287	23.2562	23.4082	22.983	22.7203
Solyc01g010790	0	0	0	0	0	0.0534016	0	0	0	0	0	0
Solyc01g010793	0	0	0	0	0	0	0	0	0	0	0	0
Solyc01g010797	0	0	0	0	0	0	0	0	0	0	0	0
Solyc01g010810	9.07582	8.53947	9.2418	7.81329	8.37719	6.73267	9.47056	9.95048	11.7233	9.80468	8.91374	9.85599
Solyc01g010820	13.2939	15.5773	16.0357	14.2292	15.6064	13.569	12.2928	11.6328	10.5478	13.1604	15.2328	13.215
Solyc01g010830	7.40879	7.0958	7.03921	9.83394	8.74417	9.18457	10.661	9.79047	12.3496	14.527	10.2903	9.41496
Solyc01g010835	7.40382	6.2782	7.1645	8.05993	8.61599	4.78453	4.68674	4.20598	4.33943	13.1735	8.86752	9.28967
Solyc01g010840	0	0	0	0	0	0	0	0	0	0	0	0
Solyc01g010850	0	0	0	0	0	0	0	0	0	0	0	0
Solyc01g010860	14.0543	17.0234	19.6503	10.6079	12.212	11.89	12.4186	14.5118	16.0104	22.9997	22.6749	27.8625
Solyc01g010870	51.2068	66.6005	69.0114	31.4678	30.8759	52.1787	86.1962	73.7095	90.4949	123.707	196.067	173.681
Solyc01g010880	6.74037	6.22101	6.04534	5.03973	4.64544	6.29095	4.65748	3.90551	5.55109	5.29884	3.96906	4.85043
Solyc01g010890	0	0	0	0	0	0	0	0	0	0	0	0
Solyc01g010900	0	0	0	0	0	0	0	0	0	0	0	0
Solyc01g010910	0	0	0	0	0	0	0	0	0	0	0	0
Solyc01g010920	2.90957	2.72818	2.14323	2.26394	2.87039	1.82924	4.79637	4.61574	5.79029	0.729834	1.42043	0.56415
Solyc01g010930	1.58684	2.53792	2.92459	1.32529	1.75673	1.61856	1.13631	1.27252	2.19273	1.01041	1.75793	0.946709
Solyc01g010933	0.869352	0.327152	1.55557	0.464677	0.372551	0.856149	0.0622527	0.0606215	0	0	0.326469	0.207462
Solyc01g010937	0.0503172	0.0984632	0	0.480749	0.186878	0.276081	0.140522	0	0.212677	0	0	1.0927
Solyc01g010940	28.651	29.2597	27.9419	35.9398	37.779	34.8002	51.0083	28.1322	36.5685	42.0199	24.424	33.9718
Solyc01g010950	11.5347	12.6122	13.0561	12.353	10.4891	12.114	11.6897	12.2889	15.742	20.7366	20.9687	22.4296
Solyc01g010960	0	0	0	0	0	0	0	0	0	0	0	0
Solyc01g010970	0.124527	0.208868	0.132419	0.370838	0.528562	0.504306	0.563052	0.435413	0.601531	0.66042	0.729513	0.956602
Solyc01g010980	0	0	0	2.81347	0	0	0	0	0	0	0	0
Solyc01g010990	18.5236	18.4816	21.0151	15.7716	17.1237	16.3077	14.4076	12.4098	11.1947	9.53741	9.00338	21.8018
Solyc01g011000	212.865	222.876	209.135	189.562	196.896	198.348	472.736	307.123	361.935	312.611	347.993	265.526
Solyc01g011010	9.41961	9.10533	8.02537	4.92871	4.32037	4.77399	13.6286	11.0081	10.5531	9.22347	11.5241	8.91933
Solyc01g011020	0	0	0	0	0	0	0	0	0	0	0	0
Solyc01g011025	33.4881	39.9427	40.0619	34.9044	29.613	16.041	17.517	10.9865	17.255	21.7603	26.1577	29.683
Solyc01g011030	21.7118	19.9687	23.1199	22.5881	20.9658	13.7218	18.3252	21.4752	18.7618	14.5231	15.6872	17.4628
Solyc01g011040	54.5688	54.6002	56.8578	52.0296	55.1715	38.3285	46.1982	46.8177	50.6889	44.0796	36.687	54.4044
Solyc01g011050	0	0	0	0	0	0	0	0.0393976	0.0367392	0	0.0424341	0
Solyc01g011060	0	0	0	0	0	0	0	0	0	0	0	0
Solyc01g011070	0	0	0	0.315899	0.337693	0.997767	0	0	0	0	0	0
Solyc01g011080	31.0961	33.693	33.1129	24.0083	20.7456	20.3267	18.3334	12.6328	15.6748	18.258	35.7592	38.4687
Solyc01g011090	0	0	0	0	0	0	0	0	0	0	0	0
Solyc01g011091	0.0998638	0.120257	0.128657	0.0800672	0.0356629	0.0842975	0.0286043	0.020891	0.0584442	0.0770761	0.135007	0.0953257
Solyc01g011092	0	0	0	0.324437	0	0	0	0	0	0	0	0.193132
Solyc01g011093	0	0	0	0	0	0	0	0	0	0	0	0
Solyc01g011095	3.01611	2.59691	1.96445	0.9431	1.2322	1.26874	2.52694	3.55438	7.69995	0.121049	0	0.686172
Solyc01g011096	0	0	0	0	0	0	0	0	0	0	0	0
Solyc01g011097	0	0	0	0.67313	0.359785	0	0	0	0	0	0	0
Solyc01g011098	0	0	0	0	0	0	0	0	0	0	0	0
Solyc01g011110	0	0	0	0	0	0	0	0	0	0	0	0
Solyc01g011170	0	0	0	0	0	0	0	0	0	0	0	0
Solyc01g011175	0	0	0	0	0	0	0	0	0	0	0	0
Solyc01g011180	0	0	0	0	0	0	0	0	0	0	0	0
Solyc01g011190	0	0	0	0	0	0	0	0	0	0	0	0
Solyc01g011195	0	0	0	0	0	0	0	0	0	0	0	0
Solyc01g011200	2.48768	2.19846	2.01602	3.83358	4.3961	3.74259	2.3905	4.00102	2.78132	1.44931	2.74234	1.32775
Solyc01g011220	3.03698	2.19629	2.21148	3.44068	2.69724	2.89797	0.860436	1.79548	3.79514	2.11977	2.96525	2.18473
Solyc01g011225	3.09769	1.632	3.3257	6.41601	4.64619	2.61484	1.77456	2.59209	0.604297	1.19542	4.65312	1.47846
Solyc01g011230	4.53484	2.74671	2.81299	4.68912	2.40606	4.14697	0.402049	0.58727	1.09529	1.08335	4.21689	2.67971
Solyc01g011237	0	0	0	0	0	0	0	0	0	0	0	0
Solyc01g011260	0	0	0	0	0	0	0	0	0	0	0	0
Solyc01g011270	0	0	0	0	0	0	0	0	0	0	0	0
Solyc01g011300	0	0	0	0	0	0	0	0	0	0	0	0
Solyc01g011310	0	0	0	0	0	0	0	0	0	0	0	0
Solyc01g011320	0	0	0	0	0	0	0	0	0	0	0	0
Solyc01g011330	0	0	0	0	0	0	0	0	0	0	0	0
Solyc01g011333	0	0	0	0	0.160404	0	0.643278	0.626422	0.87623	0	0	0.71459
Solyc01g011335	0	0	0	0	0	0	0	0	0	0	0	0
Solyc01g011337	0	0	0	0	0	0	0	0	0	0	0	0
Solyc01g011340	14.5545	12.0902	14.4239	17.4423	16.483	10.5177	7.5462	6.69235	6.42989	11.7117	11.3455	13.0776
Solyc01g011350	32.7392	18.7768	22.6834	42.583	39.351	13.0983	7.80207	10.2395	9.82811	9.09363	13.0467	14.5875
Solyc01g011370	0	0	0	0	0	0	0	0	0	0	0	0
Solyc01g011390	0	0	0	0	0	0	0.0684339	0	0	0	0	0
Solyc01g011393	0	0	0	0.364991	0.520229	0.128092	0	0	0	0	0	0
Solyc01g011397	0	0	0	0	0	0	0	0	0	0	0	0
Solyc01g011410	0.840434	0.2741	0.260663	0	0	0.256184	0	1.77768	0.710457	3.09193	3.00881	3.76608
Solyc01g011415	0	0	0	0.863312	0.263678	0	0	0.128717	0.840221	0	0	0
Solyc01g011430	0.0789741	0.309081	0.514374	0.548761	1.39322	0.830523	0.0735175	0.393751	0.333802	0	0	0
Solyc01g011460	0.437499	0.362204	0.438387	0.263078	0.37497	0.184652	0.281956	0.945734	0.312939	0	0	0
Solyc01g011470	0	0	0	0	0	0	0	0	0	0	0	0
Solyc01g011480	0	0	0	0	0	0	0	0	0	0	0	0
Solyc01g011490	0	0	0	0	0.13367	0	0	0	0	0	0	0
Solyc01g011497	0.40319	0	0.0937879	0.0875505	0.187181	0.184352	0	0	0	0	0	0
Solyc01g011500	0	0	0	0	0	0	0	0	0	0	0	0
Solyc01g011510	41.2677	46.7751	62.7006	17.5119	18.4839	11.627	11.5317	23.0847	14.9246	15.5637	7.98057	18.7455
Solyc01g011520	0	0	0	0	0	0	0	0	0	0	0	0
Solyc01g011530	0	0	0	0	0	0	0	0	0	0	0	0
Solyc01g011540	0	0	0	0	0	0	0	0	0	0	0	0
Solyc01g012540	0	0	0	0	0	0	0	0	0	0	0	0
Solyc01g012550	0	0	0	0	0	0	0	0	0	0	0	0
Solyc01g012560	0	0	0	0	0	0	0	0	0	0	0	0
Solyc01g012570	0	0	0	0	0	0	0	0	0	0	0	0
Solyc01g012580	0	0	0	0	0	0	0.227039	0	0	0	0	0.252208
Solyc01g012590	0	0	0	0	0	0	0	0	0	0	0	0
Solyc01g012600	0	0	0	0	0	0	0	0	0	0	0	0
Solyc01g012610	0	0	0	0	0	0	0	0	0	0	0	0
Solyc01g012630	0	0	0	0	0	0	0	0	0	0	0	0
Solyc01g012640	0	0	0	0	0	0	0	0	0	0	0	0
Solyc01g012650	0	0	0	0	0	0	0	0	0	0	0	0
Solyc01g012670	0	0	0	0	0	0	0	0	0	0	0	0
Solyc01g012680	0	0	0	0	0	0	0	0	0	0	0	0
Solyc01g012690	0	0	0	0	0	0	0	0	0	0	0	0
Solyc01g012700	0	0.188197	0.119314	0	0	0	0	0.0581216	0	0	0	0.132604
Solyc01g012710	0	0	0	0	0	0	0	0	0	0	0	0
Solyc01g012720	0	0	0	0	0	0	0	0	0	0	0	0
Solyc01g012730	0	0	0	0	0	0	0	0	0	0	0	0
Solyc01g012740	0	0	0	0	0	0	0	0	0	0	0	0
Solyc01g012750	0	0	0	0	0	0	0	0	0	0	0	0
Solyc01g012760	0	0	0	0	0	0.0911422	0	0	0	0	0	0
Solyc01g013760	0	0	0	0	0	0	0	0	0	0	0	0
Solyc01g013770	0	0	0	0	0	0	0	0	0	0	0	0
Solyc01g013780	0	0	0	0	0	0	0	0	0	0	0	0
Solyc01g013790	0	0	0	0	0	0	0	0	0	0	0	0
Solyc01g013800	0	0	0	0	0	0	0	0	0	0	0	0
Solyc01g013810	0	0	0	0	0	0	0	0	0	0	0	0
Solyc01g013820	0	0	0	0	0	0	0	0	0	0	0	0
Solyc01g013830	0	0	0	0	0	0	0	0	0	0	0	0
Solyc01g013840	0	0	0	0	0	0	0	0	0	0	0	0
Solyc01g013850	0	0	0	0	0	0	0	0	0	0	0	0
Solyc01g013860	0	0	0	0	0	0	0	0	0	0	0	0
Solyc01g013870	0	0	0	0	0	0	0	0	0	0	0	0
Solyc01g013880	0	0	0	0	0	0	0	0	0	0	0	0
Solyc01g013885	3.13489	7.81654	5.78671	3.64516	5.35202	5.27113	2.96536	5.50029	5.1719	7.96498	10.4167	5.85615
Solyc01g013890	0	0	0	0	0	0	0	0	0	0	0	0
Solyc01g013895	0	0	0.705697	0	0	0	0	0	0	0	0	0
Solyc01g013910	0	0	0	0	0	0	0	0	0	0	0	0
Solyc01g013915	0	0	0	0	0	0	0	0	0	0	0	0
Solyc01g013920	0	0	0	0	0	0	0	0	0	0	0	0
Solyc01g013930	0	0	0	0	0	0	0	0	0	0	0	0
Solyc01g013940	0	0	0	0	0	0	0	0	0	0	0	0
Solyc01g013950	0	0	0	0	0	0	0	0	0	0	0	0
Solyc01g013960	0	0	0	0	0	0	0	0	0	0	0	0
Solyc01g013980	0	0	0	0	0	0	0	0	0	0	0	0
Solyc01g013990	0	0	0	0	0	0	0	0	0	0	0	0
Solyc01g013995	0	0	0	2.26508	2.34797	4.62497	0	0	0	0	0	0
Solyc01g014010	0	0	0	0	0	0	0	0	0	0	0	0
Solyc01g014020	0	0	0	0	0	0	0	0	0	0	0	0
Solyc01g014050	0	0	0	0	0	0	0	0	0	0	0	0
Solyc01g014060	0	0	0	0	0	0	0	0	0	0	0	0
Solyc01g014065	0	0	0	0	0	0	0	0	0	0	0	0
Solyc01g014070	0	0	0	0	0	0	0	0	0	0	0	0
Solyc01g014075	0	0	0	0.122491	0.261884	0.0644816	0	0	0	0	0	0.145835
Solyc01g014090	0	0	0	0	0	0	0	0	0	0	0	0
Solyc01g014095	0	0	0	0	0	0	0	0	0	0	0	0
Solyc01g014100	0.685103	0.968242	1.20409	1.71908	2.19108	2.64524	0.070863	0.552049	0.707848	0	0	0
Solyc01g014103	5.22623	6.00833	6.36214	12.5968	16.4987	9.39914	9.36537	17.4108	14.1375	2.35969	1.2757	1.216
Solyc01g014107	2.27334	2.06541	2.41743	4.01967	4.97546	4.08355	1.51162	2.20801	0.549074	0.488779	0.396366	0.251879
Solyc01g014130	0	0	0	0	0	0	0	0	0	0	0	0
Solyc01g014140	0	0	0	0	0	0	0	0	0	0	0	0
Solyc01g014143	0	0	0	0.0488415	0	0	0	0	0	0	0	0
Solyc01g014147	0	0	0	0	0	0	0	0	0	0	0	0
Solyc01g014150	0	0	0	0	0	0	0	0	0	0	0	0
Solyc01g014170	0	0	0	0	0	0	0	0	0	0	0	0
Solyc01g014180	574.704	615.423	599.126	408.516	397.532	406.966	538.436	714.602	682.706	490.575	791.517	692.288
Solyc01g014185	0	0	0	0	0	0	0	0	0	0	0	0
Solyc01g014210	0	0	0	0	0	0	0	0	0	0	0	0
Solyc01g014220	0	0	0	0	0.144725	0	0	0	0	0	0	0
Solyc01g014225	0	0	0	0	0	0	0	0	0	0	0	0
Solyc01g014230	8.56212	8.75818	10.5921	7.16643	6.39608	6.77989	4.13018	4.3924	4.68822	6.83363	8.0559	10.9268
Solyc01g014240	0	0	0	0	0	0	0	0	0	0	0	0
Solyc01g014245	45.9265	70.836	63.3571	27.2864	30.3534	42.5816	60.2702	60.8593	82.2308	170.082	265.158	225.92
Solyc01g014250	83.2536	127.527	103.114	52.2947	54.7763	58.6878	122.565	112.356	156.044	243.629	411.281	290.321
Solyc01g014260	0	0	0	0	0	0	0	0	0	0	0.430661	0
Solyc01g014270	32.472	24.9504	27.9947	29.3199	25.324	21.8096	31.9931	37.9734	41.6145	15.8303	20.8382	21.8804
Solyc01g014300	0	0	0	0	0	0	0	0	0	0	0	0
Solyc01g014310	0	0	0	0	0	0	0	0	0	0	0	0
Solyc01g014320	0	0	0	0	0.17341	0	0	0	0	0	0	0
Solyc01g014350	0	0	0	0	0	0	0	0	0	0	0	0
Solyc01g014360	0	0	0	0.236924	0	0	0	0	0	0	0	0
Solyc01g014370	0	0	0	0	0	0	0	0	0	0	0	0
Solyc01g014375	4.82836	6.55745	7.44293	12.3936	16.795	8.30355	5.70229	13.4575	6.27474	1.73536	1.19617	1.26689
Solyc01g014390	0	0.27148	0.0737631	0	0.110412	0	0.0368993	0	0	0	0	0.0409898
Solyc01g014393	0	0	0	0	0	0	0	0	0	0	0	0
Solyc01g014397	0	0	0	0	0	0	0	0	0	0	0	0
Solyc01g014400	0	0	0	0	0	0	0	0	0	0	0	0
Solyc01g014410	0	0	0	0	0	0	0	0	0	0	0	0
Solyc01g014420	0	0	0	0	0	0	0	0	0	0	0	0
Solyc01g014430	0	0	0	0	0	0	0	0	0	0	0	0
Solyc01g014440	0	0	0	0	0	0	0	0	0	0	0	0
Solyc01g014450	0	0	0	0	0	0	0	0	0	0	0	0
Solyc01g014460	0	0	0	0	0	0	0	0	0	0	0	0
Solyc01g014470	3.59908	7.32457	2.00928	1.75061	3.20808	0.921549	16.752	10.9624	24.5831	0.433339	2.10845	5.21055
Solyc01g014480	10.6551	10.646	11.8465	12.2743	12.2617	11.6223	7.67031	7.57163	8.28205	13.0011	15.1863	13.9598
Solyc01g014490	19.301	20.66	21.2973	15.654	16.5808	13.5393	16.2014	16.1507	18.5821	14.8554	18.8854	18.2107
Solyc01g014495	15.4454	12.9533	16.3288	12.9253	10.196	9.80726	5.06343	3.86087	4.59804	11.6358	14.0786	11.5148
Solyc01g014510	0	0	0	0	0	0	0	0	0	0	0	0
Solyc01g014520	0	0	0	0	0	0	0	0	0	0	0	0.0499713
Solyc01g014530	14.5073	7.09714	7.16003	0.986142	0.937046	0.749843	3.87533	0.914855	2.50605	0.379721	0.246342	21.0681
Solyc01g014534	0	0	0	0	0	0	0	0	0	0	0	0
Solyc01g014535	0	0	0	0	0	0	0	0	0	0	0	0
Solyc01g014536	0	0	0	0	0	0	0	0	0	0	0	0
Solyc01g014537	0	0	0	0	0	0	0	0	0	0	0	0
Solyc01g014540	0	0	0	0	0	0	0	0	0	0	0	0
Solyc01g014550	0.187608	0.0917802	0	0	0	0	0.30563	0.170069	0.475781	1.22354	0.0457943	0.0485016
Solyc01g014560	2.14067	3.69291	2.56838	2.00613	1.30764	1.90606	8.86256	2.50228	6.23838	11.5871	2.53013	6.75753
Solyc01g014561	0	0	0	0	0	0	0	0	0	0	0	0
Solyc01g014562	0	0	0	0	0	0	0	0	0	0	0	0
Solyc01g014564	0	0	0	0	0	0	0	0	0	0	0	0
Solyc01g014566	0	0	0	0.202317	0	0	0	0	0	0	0	0
Solyc01g014568	0	0	0	0	0	0	0	0	0	0	0	0
Solyc01g014620	0.165846	0	0.771562	0.432149	0.461964	0.606643	0.154387	0	0	0	0	0
Solyc01g014623	0	0	0	0	0	0.371717	0	0	0	0	0	0
Solyc01g014640	0	0	0	0	0	0	0	0	0	0	0	0
Solyc01g014643	0	0	0	0	0	0	0	0	0	0	0	0
Solyc01g014647	0	0	0	0	0	0	0	0	0	0	0	0
Solyc01g014650	0	0	0	0	0	0	0	0	0	0	0	0
Solyc01g014655	0	0	0	0	0	0	0	0	0	0	0	0
Solyc01g014660	0	0	0	0	0	0	0	0	0	0	0	0
Solyc01g014680	0	0	0.321484	0	0	0.31596	0.321639	0.626422	0	1.04001	0.337351	0
Solyc01g014690	0.318118	0.466882	0.295996	0	0.590746	0.145455	1.62876	0.432568	1.61352	4.62819	0.155302	1.64484
Solyc01g014700	0.452306	1.32764	1.47298	0.294647	0.209983	0.258512	2.42107	0.56378	0.191178	4.19787	0.496826	1.16933
Solyc01g014705	0	0	0	1.22372	0.560635	0	0	0	0	0	0	0
Solyc01g014710	0	0	0	0	0	0	0	0.452835	0	0	0	0
Solyc01g014715	0	0	0	0	0	0	0	0	0	0	0	0
Solyc01g014720	0	0	0	2.0167	1.07791	0	0	0	0	0	0	0
Solyc01g014725	0	0	0	0	0.119556	0	0	0.116725	0	0	0	0
Solyc01g014730	0	0	0	0	0	0	0	0	0	0	0	0.155065
Solyc01g014740	0.232929	0	0	0	0.216275	0	0	0	0	0	0	0
Solyc01g014760	0	0	0	0	0	0	0	0	0	0	0	0
Solyc01g014770	0	0	0	0	0	0	0	0	0	0	0	0
Solyc01g014780	0	0	0	0	0	0	0	0	0	0	0	0
Solyc01g014790	0	0	0	0	0	0	0	0	0	0	0	0
Solyc01g014800	0	0	0	0	0	0	0	0	0	0	0	0
Solyc01g014820	0	0	0	0	0	0.481293	0	0	0	0	0	0
Solyc01g014830	0	0	0	0	0	0	0	0	0	0	0	0
Solyc01g014840	1.41541	1.9584	0.971103	0.459469	0.862863	2.75865	1.61041	0.842429	0.954789	1.17629	2.58248	4.05098
Solyc01g014850	29.1038	35.1994	30.6798	26.3322	30.0255	25.5584	32.0385	31.4083	43.2013	27.9847	43.4704	36.0679
Solyc01g014860	16.799	20.2834	20.6193	25.4571	21.5716	21.2456	15.971	13.6085	12.3881	19.0071	30.7106	26.9819
Solyc01g014910	0	0	0	0.897218	0.099219	0	0	0	0	0	0.0347785	0.221007
Solyc01g014920	0	0	0	0	0	0	0	0	0	0	0	0
Solyc01g014930	0	0	0	0	0	0	0	0	0	0	0	0
Solyc01g014940	0	0	0	0	0	0	0	0	0	0	0	0
Solyc01g014960	0	0.0811337	0	0.216075	0.153988	0.0758303	0	0	0.140197	0	0	0
Solyc01g014970	0	0	0	0	0	0	0	0	0	0	0	0
Solyc01g014980	0	0	0	0.875303	2.40606	0.526599	0	0	0	0	0	0
Solyc01g014990	0	0	0	1.13724	1.01308	0.199553	0	0	0	0	0	0
Solyc01g015000	0.336902	0.263707	0.564251	6.02809	3.94145	3.14248	0.564524	0.183244	0.455678	0.608458	0.131578	0.557426
Solyc01g015010	0	0	0	6.20904	3.3187	4.24911	0	0	0	0	0	0
Solyc01g015020	34.3982	39.7356	39.9167	27.3568	29.8487	32.3237	23.6221	25.4485	24.4233	42.8387	74.7642	52.0776
Solyc01g015030	0	0	0	0.124181	0	0	0	0	0	0	0	0
Solyc01g015040	0	0	0	1.24181	0	1.30742	0	0	0	0	0	0
Solyc01g015050	0	0	0	0.189539	0.202616	0.59866	0	0	0	0	0	0
Solyc01g015060	0	0	0	0.73196	0.625967	0.308253	0	0	0	0	0	0
Solyc01g015070	0	0	0	1.51039	1.51962	0.841866	0	0	0	0	0	0
Solyc01g015080	0	0	0	0	0	0	0	0	0	0	0	0
Solyc01g015085	0	0	0	0	0	0	0	0	0	0	0	0
Solyc01g015130	0	0	0	0	0	0	0	0	0	0	0	0
Solyc01g015140	0	0	0	0	0	0	0	0	0	0	0	0
Solyc01g015170	0	0	0	0	0	0	0	0	0	0	0	0
Solyc01g015180	0	0	0	0	0	0	0	0	0	0	0	0
Solyc01g015210	0	0	0	0.0631797	0	0	0	0	0	0	0	0
Solyc01g015230	0	0	0	0	0	0	0	0	0	0	0	0
Solyc01g015240	0	0	0	0	0	0	0	0	0	0	0	0
Solyc01g015250	1.30587	2.39568	3.34141	0.141781	0.606251	0.895634	0	0	0	0	0	0
Solyc01g015280	0	0	0	0	0	0	0	0	0	0	0	0
Solyc01g015285	0	0.362204	0	5.14464	4.4684	4.06234	0	0	0.15647	0	0	0.191408
Solyc01g015290	0	0	0	0	0	0	0	0	0	0	0	0
Solyc01g016300	0	0	0	0	0	0	0	0	0	0	0	0
Solyc01g016350	0	0	0	0	0	0	0	0	0	0	0	0
Solyc01g016360	0	0	0	0	0.0435815	0	0	0	0	0	0	0
Solyc01g016370	0	0	0	0	0	0	0	0	0	0	0	0
Solyc01g016380	0	0	0	0	0.0746065	0	0	0	0	0	0.0784538	0
Solyc01g016390	0	0	0	0	0	0	0	0	0	0	0	0
Solyc01g016400	3.07122	10.0165	4.04832	2.22299	1.42581	5.14897	12.6273	17.6326	7.35601	2.82473	2.4989	7.41056
Solyc01g016410	16.2398	25.2988	20.3442	16.2726	17.0162	18.8331	19.6362	23.3161	19.9021	31.8148	22.8985	33.5404
Solyc01g016413	0.153561	0.300495	0.214323	1.53386	0.712907	1.82554	0.142951	0	0.129812	0	0	0.238197
Solyc01g016430	0	0	0	0	0.168846	0	0	0	0	0	0	0
Solyc01g016435	0	0	0	0	0	0	0	0	0	0	0	0
Solyc01g016450	0	0	0	0	0	0	0	0	0	0	0	0
Solyc01g016455	0	0	0	0	0	0	0	0	0	0	0	0
Solyc01g016460	0	0	0	0	0	0	0	0	0	0	0	0
Solyc01g016470	43.1259	34.4966	34.2134	57.5674	52.6172	40.5443	109.592	46.5701	62.8072	32.0354	46.3181	28.7922
Solyc01g016475	0	0	0	0	0	0	0	0	0	0	0	0
Solyc01g016520	0	0	0	0.720249	0	0	0	0	0	0	0	0
Solyc01g016540	0	0	0	0.168598	0.0360458	0.142004	0	0	0	0	0	0
Solyc01g016550	0	0	0	0.418749	0.22382	0	0	0.874077	0	0	0	0.249275
Solyc01g016580	0	0	0	0	0	0	0	0	0	0	0	0
Solyc01g016590	0	0	1.03334	0	0	0	0	0	0	0	0	0
Solyc01g016600	0	0	0	0	0	0	0	0	0	0	0	0
Solyc01g016610	0	0	0	0	0	0	0	0	0	0	0	0
Solyc01g016620	0	0	0	0	0.165935	0	0	0	0	0	0	0
Solyc01g016630	0	0	0	0.455854	0	0	0	0	0	0	0	0
Solyc01g016633	0	0	0	0	0	0	0	0	0	0	0	0
Solyc01g016637	0	0	0	0	0	0	0	0	0	0	0	0
Solyc01g016640	0	0	0	0	0	0	0	0	0	0	0	0
Solyc01g016645	0	0	0	0	0	0	0	0	0	0	0	0
Solyc01g016650	0	0	0	0	0	0	0	0	0	0	0	0
Solyc01g016655	0	0	0	0	0	0	0	0	0	0	0	0
Solyc01g016660	0	0	0	0	0	0	0	0	0	0	0	0
Solyc01g016670	0	0	0	0	0	0	0	0	0	0	0	0
Solyc01g016680	0	0	0	0	0	0	0	0	0	0	0	0
Solyc01g016690	0	0	0	0	0	0	0	0	0	0	0	0
Solyc01g016697	0	0	0	0	0	0	0	0	0	0	0	0
Solyc01g016700	0	0	0	0	0	0	0	0	0	0	0	0
Solyc01g016720	10.031	14.1766	7.88154	4.45315	6.20919	3.26152	2.07509	3.63729	3.01499	3.35488	6.52938	2.30513
Solyc01g016730	0	0	0	0	0	0	0	0	0	0	0	0
Solyc01g016740	0	0	0	0	0	0	0	0	0	0	0	0
Solyc01g016750	0	0	0	0	0	0	0	0	0	0	0	0
Solyc01g016760	0	0	0	0	0	0	0	0	0	0	0	0
Solyc01g016770	1.11057	1.44882	1.37779	0	1.03117	0.338528	0	0	0	0	0	0
Solyc01g016780	0.323917	0.950786	0.904174	0.281347	0	0	0	0	0	0	0	0
Solyc01g016790	0	0	0	0	0	0	0	0	0	0	0	0
Solyc01g016800	0	0.201825	0	0.0895832	0	0	0	0	0	0	0.100702	0
Solyc01g016805	4.70057	13.5447	12.5443	3.49955	4.74817	8.36086	6.49155	4.35478	10.5672	0	1.36173	10.7901
Solyc01g016850	0	0	0	0	0	0	0	0	0	0	0	0
Solyc01g016880	0	0	0	0	0	0	0	0	0	0	0	0
Solyc01g016890	0	0	0	0	0	0	0	0	0	0	0	0
Solyc01g016900	0	0	0	0	0	0	0	0	0	0	0	0
Solyc01g016910	0	0	0	0	0	0	0	0	0	0	0	0
Solyc01g016940	0	0	0	0	0	0	0	0	0	0	0	0
Solyc01g016960	0	0	0	0	0	0	0	0	0	0	0	0
Solyc01g016970	1.76773	3.77366	1.19622	2.65208	3.87954	6.76007	17.952	33.7976	13.3133	7.73963	2.19671	6.31498
Solyc01g016980	0	0	0	0	0	0	0	0	0	0	0	0
Solyc01g016985	0	0	0	0	0	0	0	0	0	0	0	0
Solyc01g017020	0	0	0	0	0	0	0	0	0	0	0	0
Solyc01g017030	0	0	0	0	0	0	0	0	0	0	0	0
Solyc01g017040	0	0	0	0	0	0	0	0	0	0	0	0
Solyc01g017050	0.195573	0.574059	0	0	0	0	0	0.177289	0	0.196229	0.381907	0.606727
Solyc01g017060	0	0	0	0	0	0	0	0	0	0	0	0
Solyc01g017070	0	0	0	0	0	0	0	0	0	0	0	0
Solyc01g017080	0	0	0	0	0.0785652	0	0	0	0	0	0	0
Solyc01g017083	0	0	0	0	0	0	0	0	0	0	0	0
Solyc01g017087	0.471152	0	0	0	0.218733	0	0	0	0	0.236367	0	0.24361
Solyc01g017090	0	0	0.0866274	0	0	0	0.260008	0.421991	0	0.560486	0.363612	0.0962771
Solyc01g017100	0	0	0	0	0	0	0	0	0	0	0	0
Solyc01g017110	0	0	0	0.0461698	0	0	0	0	0	0	0.0519002	0
Solyc01g017120	0	0	0	0	0	0	0	0	0	0	0	0
Solyc01g017130	0	0	0	0	0	0	0	0	0	0	0	0
Solyc01g017140	0	0	0	0	0	0	0	0	0	0	0.0598848	0.0634251
Solyc01g017150	0	0	0	0	0	0	0	0	0	0	0	0
Solyc01g017160	0	0	0	0	0	0	0	0	0	0	0	0
Solyc01g017170	0	0	0	0.13048	0.418445	0.274748	0	0	0.888929	0.45218	0.733372	0.155346
Solyc01g017180	0	0	0	0	0	0.0898463	0	0	0	0	0	0
Solyc01g017183	0	0	0	0	0	0	0	0	0	0	0	0
Solyc01g017185	0	0	0	0	0	0	0	0	0	0	0	0
Solyc01g017187	0	0	0	0	0	0	0	0	0	0	0	0
Solyc01g017190	0	0	0	0	0	0	0	0	0	0	0	0
Solyc01g017200	0	0	0	0	0	0	0	0	0	0	0.736039	0.584664
Solyc01g017210	0	0	0	0	0	0	0	0	0	0	0	0
Solyc01g017220	4.70181	1.25464	1.98856	4.26952	4.36563	0.977195	3.97904	2.32486	2.70999	1.07218	1.87804	3.31511
Solyc01g017230	0	0	0	0	0.092098	0	0	0	0.0838498	0	0.193695	0
Solyc01g017235	0	0	0	0	0	0	0	0	0	0	0	0
Solyc01g017240	0	0	0	0	0	0	0	0	0	0	0	0
Solyc01g017245	0	0	0	0	0	0	0	0	0	0	0	0
Solyc01g017250	0	0	0	0	0	0	0	0	0	0	0	0
Solyc01g017260	0	0.140857	0	0	0	0	0	0	0	0	0	0
Solyc01g017270	0	0	0	0	0	0	0	0	0	0	0	0
Solyc01g017280	0	0	0	0	0	0	0	0	0	0	0	0
Solyc01g017290	0	0	0	0	0	0	0	0	0	0	0	0
Solyc01g017300	0	0	0	0	0	0	0	0.134714	0	0.0745529	0.0725487	0.0768376
Solyc01g017310	0	0	0	0	0	0	0	0	0	0	0	0
Solyc01g017320	0	0	0	0	0	0	0	0	0	0	0	0
Solyc01g017330	0	0	0	0	0	0	0	0	0	0	0	0
Solyc01g017333	0	0	0	0	0	0.446061	0	0	0	0	0	0
Solyc01g017337	0	0	0	0	0	0	0.285197	0.277724	0	0	0	0
Solyc01g017360	0	0	0	0	0	0	0	0	0	0	0	0
Solyc01g017370	0	0	0	0	0	0	0	0	0	0.125303	0.365803	0
Solyc01g017380	0	0	0	0	0	0	0	0	0	0	0	0
Solyc01g017390	0	0	0	0	0	0	0	0	0	0	0	0
Solyc01g017400	0	0	0	0	0	0	0	0	0	0	0	0
Solyc01g017410	0	0	0	0	0	0	0	0	0	0	0	0
Solyc01g017420	0	0	0	0	0	0	0	0	0	0.0430647	0	0
Solyc01g017430	0	0	0	0	0	0	0	0	0	0	0	0
Solyc01g017440	0.306365	0.399673	0	0	0	0	0.0950658	0	0.172656	0.102464	0.0997097	0.105604
Solyc01g017450	0	0	0	0	0	0	0	0	0	0	0	0
Solyc01g017460	0	0	0	0	0	0.265141	0	0	0.12255	0.145456	0.566184	0
Solyc01g017470	0	0	0	0	0	0	0	0	0	0	0	0
Solyc01g017480	0	0	0	0	0	0	0	0	0	0	0	0
Solyc01g017485	0	0	0	0	0	0	0	0	0	0	0	0.169468
Solyc01g017490	0	0	0	0	0	0	0	0	0	0	0	0
Solyc01g017500	0	0	0	0	0	0	0	0	0	0	0	0
Solyc01g017510	0	0	0	0	0	0	0	0	0	0	0	0
Solyc01g017530	0.515689	0.302738	0	0	0	0	0.288035	0.654471	0.697497	0.413935	0.302106	0.21331
Solyc01g017540	0	0	0	0	0	0	0	0	0	0	0	0
Solyc01g017560	0	0.141842	0	0	0.26921	0.13257	0	0.131417	0	0.145456	0.141546	0
Solyc01g017563	0	0	0	0	0	0	0	0	0	0	0	0
Solyc01g017567	0.265778	0.780132	0.247295	0.692547	0.246775	0.243046	0.989659	1.92745	2.02207	1.60002	6.22802	3.84779
Solyc01g017570	0	0	0.559103	0	0	0	0.559372	0	0	0	1.1734	0
Solyc01g017600	0.170623	0.709503	0.158758	0.778047	1.38621	0.819155	1.19126	4.29215	3.17318	0	0.0832966	0.220552
Solyc01g017610	0	0	0	0	0	0	0	0	0	0	0	0
Solyc01g017620	0	0	0	0	0	0	0	0	0	0	0	0
Solyc01g017630	0	0	0	0	0	0	0	0	0	0	0	0.18805
Solyc01g017640	0	0	0	0	0	0	0	0	0	0	0	0
Solyc01g017650	0	0	0	0.126804	0	0	0	0	0	0	0	0
Solyc01g017660	0	0	0	0	0	0	0	0	0	0	0	0
Solyc01g017670	0	0	0	0	0	0	0	0	0	0	0	0
Solyc01g017680	0	0	0	0	0	0	0	0	0	0	0	0
Solyc01g017690	0	0	0	0	0	0	0	0	0	0	0	0
Solyc01g017700	0	0	0	0	0	0	0	0	0	0	0	0
Solyc01g017710	1.59467	5.85099	3.33849	0.692547	1.85082	1.82284	3.3401	1.08419	3.37012	0.400005	1.16775	0.412263
Solyc01g017720	0.536139	0	0.498855	0.77613	0.497806	0.326855	1.49729	0.972034	2.11504	0.358625	0.174492	0
Solyc01g017730	0.351368	1.20325	0.163466	1.06817	0.652491	0.963945	0.817727	0	0.148514	0	0	0.363351
Solyc01g017735	0	0	0	0.0789747	0	0	0	0	0	0	0	0
Solyc01g017740	0.846151	0.206974	0.787308	0	0.392826	0	0	0	0	1.27349	0.619625	2.18752
Solyc01g017750	0	0	0	0.117688	0	0	0	0	0	0.135949	0	0
Solyc01g017760	0	0	0	0.287333	0.102386	0	0	0	0	0	0	0.11403
Solyc01g017770	0	0	0	0	0	0	0	0	0	0	0	0
Solyc01g017775	0	0.548201	0	3.16326	2.60115	0	0	0	0	0	0	0
Solyc01g017790	0	0	0	0.0583355	0	0.0614176	0	0	0	0	0	0
Solyc01g017793	0	0	0	0	0.902273	0.177727	0	0	0	0	0	0
Solyc01g017797	0	0	0	0	0	0	0	0	0	0	0	0
Solyc01g017820	0	0	0	0	0	0	0	0	0	0	0	0
Solyc01g017823	0	0	0	0.725779	0.443343	0.436643	0	0	0	0	0	0
Solyc01g017827	0	0	0	0	0	0	0	0	0	0	0	0
Solyc01g017840	0	0	0	0	0	0	0	0	0	0	0	0
Solyc01g017850	0	0	0	0	0	0	0	0	0	0	0	0
Solyc01g017860	18.2274	16.686	20.0897	11.0076	12.3844	13.5565	12.635	13.0839	14.4826	15.2666	14.6652	20.9119
Solyc01g017870	0	0	0.546653	0.218699	0	0.153503	0.156262	0.684753	0.283799	0	0	0
Solyc01g017950	0	0	0	0	0	0	0	0	0	0	0	0
Solyc01g017960	0	0	0	0	0	0	0	0	0	0	0	0
Solyc01g017970	0	0	0	0	0	0	0	0	0	0	0	0
Solyc01g018010	9.12322	10.8122	10.5213	6.58492	6.44267	9.98798	11.1245	15.0264	12.8176	6.05958	7.52767	4.38498
Solyc01g018020	0	0.0246158	0.023409	0.349635	0.327037	5.84372	0.140522	0.0228066	0.19141	2.54955	0.786061	0.0520332
Solyc01g018025	0	0	0	0	0.076081	0.149862	0	0	0	0	0	0
Solyc01g018040	0	0	0	0	0	0	0	0	0	0	0	0
Solyc01g018060	0	0	0	0	0	0	0	0	0	0	0	0
Solyc01g018070	0	0	0	0	0	0	0	0	0	0	0	0
Solyc01g018090	0	0	0	0	0	0	0	0	0	0	0.215331	0
Solyc01g019100	0	0	0	0	0	0	0	0	0	0	0	0
Solyc01g020100	0	0	0	0	0	0	0	0	0	0	0	0
Solyc01g020110	0	0	0	0	0	0	0	0	0	0	0	0
Solyc01g020115	0	0	0	0	0	0	0.0883894	0	0.0802654	0	0	0
Solyc01g020120	0	0	0	0	0	0	0	0	0	0	0	0
Solyc01g020125	1.06859	0.209107	0	1.85631	2.38126	0.977195	1.59162	0	0.361332	0.643307	2.92139	0.663021
Solyc01g020130	0.314499	0.153857	0.0731569	0.8195	0.365015	0.287599	0.146384	0	0	0.552219	0.614141	0.162612
Solyc01g020150	0.259134	0	0.241113	0.450156	0.962424	0.23697	0	0.234908	0.438115	0.520006	1.51808	0.267971
Solyc01g020155	0	0	0	1.09794	1.17369	0	0	0	0	0	0.493685	0
Solyc01g020160	0	0	0	0	0.24998	0.984809	0	0	0	0	0	0
Solyc01g020170	0	0	0	0	0.0631098	0	0	0	0	0	0	0
Solyc01g020180	0	0	0	0.147592	0	0	0	0	0	0	0	0
Solyc01g020190	0.229491	0.22454	0.427064	0	0.319624	0.104931	0.106817	0	0.0969997	0.345392	2.46478	0.94927
Solyc01g020200	0	0	0.123648	0	0	0.243046	0.371122	0.240931	0	0.53334	0.259501	0.687105
Solyc01g020220	0.633895	1.0337	0.851951	0.581175	0.196191	0.418655	0.163916	0.255393	0.47632	0.38868	1.44415	1.31103
Solyc01g020230	0.34401	0.649134	0.525857	0.277457	0.319414	0.584232	0.228744	0.490049	0.332351	0.443783	0.767737	0.787714
Solyc01g020240	29.0341	29.6618	32.5632	30.5912	34.9784	25.7354	32.0083	33.6954	38.0171	47.6393	69.7555	45.872
Solyc01g020280	0	0	0	0	0	0	0	0	0	0	0	0
Solyc01g020285	0.255935	0.751238	0.476273	0.889196	0.712907	1.17022	0.714754	0.116004	0.757236	10.2717	19.3665	34.4062
Solyc01g020290	0	0	0	0	0	0	0	0	0	0	0	0
Solyc01g020300	0	0	0	0	0	0	0	0	0	0	0	0
Solyc01g020320	12.04	15.1702	13.0564	7.52349	10.1336	10.6933	20.6422	19.8658	18.8914	10.0815	15.9842	11.107
Solyc01g020340	2.91861	2.05774	3.6741	1.82672	2.27156	1.05974	0.599328	0.700347	0.979636	1.16275	3.47828	3.10691
Solyc01g020360	0	0	0	0	0	0	0	0	0	0	0	0
Solyc01g020370	0	0	0	0	0	0	0	0	0	0	0	0
Solyc01g020371	0	0	0	0.774461	0.413946	0.509612	0	0.202072	0	0	0.108823	0
Solyc01g020374	0	0	0	0	0	0	0	0	0	0	0	0
Solyc01g020376	0	0	0	0	0	0	0	0	0	0	0	0
Solyc01g020378	0.921365	0.225371	0	1.20042	0.427744	0.21064	4.0741	2.9233	7.00984	0	0	0.238197
Solyc01g020400	0	0	0	0	0	0	0	0	0	0	0	0
Solyc01g020401	0	0	0	0	0	0	0	0	0	0	0	0
Solyc01g020402	0	0	0	0	0	0	0	0	0	0	0	0
Solyc01g020403	0	0	0	0	0	0	0	0	0	0	0	0
Solyc01g020404	0	0	0	0	0	0	0	0	0	0	0	0
Solyc01g020406	0	0	0	0	0	0	0	0	0	0	0	0
Solyc01g020408	0	0	0	0	0	0	0	0	0	0	0	0
Solyc01g020430	0	0	0	0	0	0	0	0	0	0	0	0
Solyc01g020440	19.9272	17.807	22.616	18.076	21.1136	13.8508	16.456	17.1902	17.5586	8.34429	11.9642	10.9681
Solyc01g020445	0	0	0	0	0	0	0	0	0	0	0	0
Solyc01g020450	0	0	0	0	0	0	0	0	0	0	0	0
Solyc01g020460	0	0	0	0	0	0	0	0	0	0	0	0
Solyc01g020470	0	0	0	0	0	0	0	0	0	0	0	0
Solyc01g020480	0	0	0	0	0	0	0	0	0	0	0	0
Solyc01g020490	0	0	0	0	0	0	0	0	0	0	0	0
Solyc01g020500	14.574	17.3656	14.9031	8.77334	7.90483	5.54212	9.94022	10.5954	15.2476	9.12123	13.8071	12.0867
Solyc01g020510	0	0	0	0	0	0	0	0	0	0	0	0
Solyc01g020520	0	0.141842	0.0674442	0	0	0	0	0	0	0	0	0.074957
Solyc01g020525	2.10615	1.74367	2.11043	1.79417	1.41026	1.4445	1.48932	2.11119	2.05433	1.44267	2.39255	2.68058
Solyc01g020570	0	0	0	0	0	0	0	0	0	0	0	0
Solyc01g021600	0	0	0.0645118	1.6862	2.57505	0.19021	0.064543	0.817072	0.117221	0	0	0
Solyc01g021610	0	0	0	0	0	0	0	0	0	0	0	0
Solyc01g021620	0	0	0	0	0.221247	0	0	0	0	0	0	0
Solyc01g021640	10.8372	11.3182	12.8594	12.4536	10.2602	12.3043	13.1489	14.0462	16.3151	19.3952	25.1453	15.8658
Solyc01g021670	369.166	355.545	390.603	268.881	265.407	164.603	153.459	207.442	148.454	215.803	329.501	222.622
Solyc01g021675	133.7	119.261	126.355	82.0537	84.0598	43.5544	89.4075	118.346	108.031	63.9805	109.532	78.6953
Solyc01g021690	0	0	0	0.135385	0.434176	0.427615	0	0	0	0.312786	0.304377	0
Solyc01g021700	0	0	0	0	0	0	0	0	0	0	0	0
Solyc01g021720	2.38284	3.49714	2.88227	1.24181	1.99122	0.217903	1.99638	1.51205	1.81289	3.34717	5.35109	1.23205
Solyc01g021730	0	0.114166	0.162853	0.0506742	0	0	0.488795	0.899086	0.591825	1.11221	1.08231	0.48265
Solyc01g021740	0	0	0	0	0	0	0	0	0	0	0	0
Solyc01g022740	4.09373	4.32371	5.12076	5.06278	5.26103	4.51214	5.42608	4.62034	4.76694	4.56989	5.79703	5.49493
Solyc01g022750	87.9476	69.2783	75.4196	86.4149	81.5794	75.3052	150.19	112.287	125.027	129.296	87.973	102.883
Solyc01g022760	0	0	0	0	0	0	0	0	0	0	0	0
Solyc01g022780	0	0	0	0	0	0	0	0	0	0	0	0
Solyc01g028800	1.30791	0.370925	0.246919	4.82398	3.76639	3.03344	0.79405	0.343663	0.464688	0.931923	0.296121	0.137212
Solyc01g028805	1.75642	5.01035	5.10998	1.9983	2.27399	4.43399	12.4357	15.6082	13.7604	7.62014	11.449	4.22103
Solyc01g028810	377.888	400.852	418.333	543.833	584.684	314.63	371.614	400.244	343.154	958.469	968.402	978.074
Solyc01g028830	24.6925	29.2306	29.3277	15.4308	18.8783	16.4056	16.167	17.0083	16.5346	6.25008	9.6583	11.9041
Solyc01g028840	0	0	0	0	0	0	0	0	0	0	0	0
Solyc01g028860	236.776	251.393	265.516	275.953	262.638	217.508	174.401	209.588	204.333	191.869	340.902	278.895
Solyc01g028870	29.0341	27.348	32.4025	23.9158	24.7149	20.5321	23.4993	23.4121	26.058	32.0572	29.2025	45.2733
Solyc01g028900	110.692	121.896	123.831	91.3602	93.2897	81.4397	95.2035	102.371	100.12	134.174	150.717	162.558
Solyc01g028910	0	0	0	0	0	0	0	0	0	0	0	0
Solyc01g028930	21.0658	21.9973	23.1298	20.4406	23.7601	20.9773	21.5671	26.8841	24.5293	25.3088	29.0454	29.1086
Solyc01g028935	0	0.306396	0	0.380796	0.116305	0	0	0	0.0529444	0.0628407	0.48921	0.0647664
Solyc01g028960	0	0	0	0	0	0	0	0	0	0	0	0
Solyc01g028980	0	0	0	0	0	0	0	0	0	0	0	0
Solyc01g028983	0	0	0	0	0	0	0	0	0	0	0	0
Solyc01g028987	0	0	0	0.0879067	0	0	0	0	0	0	0	0
Solyc01g033990	0	0	0	0	0	0	0	0	0	0	0	0
Solyc01g034010	0	0	0	4.38265	2.8328	2.36076	0	0	0	0	0	0
Solyc01g034020	55.8263	49.2331	54.7724	60.2624	62.2947	51.1495	50.6706	45.4849	50.0948	48.8011	49.7588	59.1725
Solyc01g034023	0	0	0	0.504062	0	0	0	0	0	0	0	0
Solyc01g034050	0	0	0.129457	0.120847	0	0	0	0	0	0	0	0
Solyc01g034060	0	0	0	0	0	0	0	0	0	0	0	0
Solyc01g034063	0	0	0	0	0	0	0	0	0	0	0	0
Solyc01g034070	0	0	0	0	0	0	0	0	0	0	0	0
Solyc01g034080	0.440142	0.0430646	0.327627	0.764596	0.776478	0.684244	0	0	0	0	0.171899	0.0455153
Solyc01g034085	0	0	0	0	0	0	0	0	0	0.0975012	0	0
Solyc01g034140	0	0	0	0	0	0	0	0	0	0	0	0
Solyc01g034150	11.1369	15.1305	10.1439	7.19666	6.82106	7.23946	12.7094	11.829	13.2711	10.804	19.0947	18.8013
Solyc01g034155	9.12673	11.8639	16.4988	7.47428	9.7453	6.08073	4.49081	3.78217	3.47186	12.3624	20.2411	18.7411
Solyc01g034170	0	0	0	0	0	0	0	0	0	0	0	0
Solyc01g034190	0	0	0	0	0	0	0	0	0	0	0	0
Solyc01g034210	0	0	0	0	0	0	0	0	0	0	0	0
Solyc01g035220	0	0	0	0	0	0	0.311264	0	0	0.335488	0	0
Solyc01g035225	0	0	0	0	0	0	0	0	0	0	0	0
Solyc01g038230	0	0	0	0	0	0	0	0	0	0	0	0
Solyc01g038235	0	0	0	0	0	0	0	0	0	0	0	0
Solyc01g044240	259.099	798.129	543.874	261.659	301.389	559.658	935.168	1493.92	1689.52	98.473	154.532	329.898
Solyc01g044270	10.5308	13.1751	12.8906	10.4401	10.2988	10.7944	8.57779	8.99857	8.97513	16.4987	13.7375	17.83
Solyc01g044277	0	0	0	0	0	0	0	0	0	0	0	0
Solyc01g044300	0	0	0	0	0	0	0	0	0	0	0	0
Solyc01g044305	0	0	0	0	0	0	0	0	0	0	0	0
Solyc01g044307	3.26182	5.10632	4.49628	4.00838	3.45486	4.08759	2.18175	1.81794	1.81782	4.994	7.71426	7.37077
Solyc01g044340	0	0	0	0	0.103486	0	0	0	0	0	0	0.115256
Solyc01g044350	1.16008	1.212	0.987931	0.597741	0.52944	0.503458	2.14155	1.92501	2.41012	1.02587	1.57423	1.7283
Solyc01g044360	88.6137	93.5504	114.851	95.7242	95.59	79.4894	70.1481	65.2176	71.0053	84.9878	159.247	145.116
Solyc01g044370	3.25133	6.28079	3.41307	3.69297	3.71552	2.66829	9.23527	12.3941	15.5748	1.422	1.30237	5.94853
Solyc01g044371	6.56959	8.14194	7.33527	4.94537	5.96432	3.2041	8.42604	12.9696	11.971	4.24794	2.56577	4.83103
Solyc01g044372	1.47438	3.01629	4.48969	1.39703	1.74232	0.490282	4.61663	3.03761	4.19231	2.28624	1.96304	3.74236
Solyc01g044373	1.55968	1.71678	1.69308	0.395121	0.724081	0.237713	0.181489	0.706934	0.549361	0.782455	0.824872	1.88168
Solyc01g044374	0	0	0	0	0	0	0	0	0	0	0	0
Solyc01g044420	0.0269697	0	0	0.0702758	0.250414	0.0986518	0	0	0.0455974	0	0	0
Solyc01g044480	0.154438	0.115848	0.177227	0.125199	0.143396	0.136521	0.0239612	0.0979999	0.0652767	0.211773	0.331739	0.292792
Solyc01g044490	0	0	0	0	0	0	0	0	0	0	0	0
Solyc01g044510	0	0	0	0	0	0	0	0	0	0	0	0
Solyc01g044520	0	0	0	0.0864299	0.0461964	0.0454982	0.0926321	0	0.0841181	0	0	0.102901
Solyc01g044540	3.25188	2.784	3.78216	1.05919	3.01937	2.97374	6.43278	5.52725	8.24687	4.89418	6.35014	6.72555
Solyc01g044543	0	0	0	0	0	0	0	0	0	0	0	0
Solyc01g044550	0	0	0	0	0	0	0	0	0	0	0	0
Solyc01g044560	0	0	0	0	0	0	0	0	0	0	0	0
Solyc01g044565	0	0	0	3.33343	3.17509	5.19684	0	0	0	0	0	0
Solyc01g047580	0	0	0	0	0	0	0	0	0	0	0	0
Solyc01g047590	0	0	0	0	0	0	0	0	0	0	0	0
Solyc01g047593	0	0	0	0	0	0	0	0	0	0	0	0
Solyc01g047597	0	0	0	0.333449	0.53468	0	0	0	0	0	0	0
Solyc01g048590	2.65778	2.86048	2.47295	3.92443	5.67583	0.972184	2.47415	5.05956	3.14544	26.1337	30.6211	36.0043
Solyc01g049640	0	0	0	0	0	0	0	0	0	0	0	0
Solyc01g049650	118.419	138.731	135.691	124.515	120.606	75.8303	31.7694	42.3721	31.7151	24.038	22.0233	17.9322
Solyc01g049660	0	0	0	0	0	0	0	0	0	0	0	0
Solyc01g049680	44.6392	56.1264	54.2124	36.356	40.7257	45.1989	66.9221	59.7903	75.9899	56.8997	72.788	59.7011
Solyc01g049685	0	0	0	0	0	0	0	0	0	0	0.547056	0
Solyc01g049690	60.879	68.3252	66.5305	45.102	44.0018	48.1399	39.6709	38.4149	32.5938	71.3836	96.5045	66.2881
Solyc01g049720	0	0	0	0	0	0	0	0	0	0	0	0
Solyc01g049740	0	0	0	0	0	0	0	0	0	0	0	0
Solyc01g049743	0	0	0	0	0	0	0	0	0	0	0	0
Solyc01g049745	0	0	0	0	0	0	0	0	0	0	0	0
Solyc01g049747	0	0	0	0	0	0	0	0	0	0	0	0
Solyc01g049750	0	0	0	0	0	0	0	0	0	0	0	0
Solyc01g049760	0	0	0	0	0	0	0	0	0	0	0	0
Solyc01g049765	0	0	0	0	0	0	0	0	0	0	0	0
Solyc01g049770	13.6364	16.7089	13.1624	10.7373	12.0697	10.3723	20.9988	29.9219	34.2592	10.2296	19.1627	12.3882
Solyc01g049775	0.131207	0	0	0	0	0	0	0	0	0	0	0
Solyc01g049790	0	0	0	0	0	0	0	0	0	0	0	0
Solyc01g049793	0.323917	0	0	0.562695	0	0	0	0	0	0	0	0
Solyc01g049810	0.570196	0.478195	0.530543	0.389133	0.831958	0.372448	0.417057	0.627653	0.413154	0.817299	1.70995	0.92658
Solyc01g049820	0.0374651	0.0733136	0	0	0.0347864	0.137043	0	0	0	0	0.0731605	0
Solyc01g049825	0.153561	0	0.285764	0.133379	0.285163	0	0	0	0	0.154076	0.74967	0.158798
Solyc01g049840	0	0	0	0	0	0	0	0	0.317187	0	0.0915886	0
Solyc01g049845	0	0	0	0	0	0	0	0	0	0	0	0
Solyc01g049880	12.3791	3.84394	3.10372	2.38223	2.47775	1.55909	2.27716	2.15029	4.69969	0.223126	1.15801	0.613235
Solyc01g049890	313.941	309.483	340.515	292.249	297.354	229.375	246.758	296.352	246.975	256.243	344.569	349.847
Solyc01g049895	0	0	0	0.577123	0	0	0	0	0	0	0	0
Solyc01g049910	2.36869	2.52451	2.26956	1.56753	1.67568	1.10883	1.27314	1.78937	1.97852	1.23076	2.76703	2.74107
Solyc01g049912	4.0621	1.6446	2.73696	0.364991	1.30057	0.384275	0.391183	0	0.710457	0.421627	2.05146	1.01394
Solyc01g049914	0	0	0	0	0.080202	0	0.0804098	0	0	0	0	0
Solyc01g049920	18.2094	20.5575	20.5924	8.27313	10.6647	7.68551	13.3002	13.4596	12.7882	6.18386	8.20584	2.31759
Solyc01g049925	0	0.0502065	0.286471	0.356559	0.714671	0.750795	0.429914	0.139549	0.0433777	0.257429	1.45295	0.902081
Solyc01g049950	0	0	0	0	0	0	0	0	0	0	0	0
Solyc01g049960	77.2014	68.9837	77.8485	76.5488	78.0421	64.6857	70.2192	67.2628	67.7343	86.11	85.8993	95.6737
Solyc01g049970	0	0	0	0	0	0	0	0	0	0	0	0
Solyc01g049975	8.1512	7.28516	8.93349	5.00362	6.07655	5.44717	2.59014	3.01961	3.77657	5.11159	4.01761	6.80819
Solyc01g050010	10.6964	10.5155	8.95732	5.44169	5.24959	7.17314	11.0954	10.7584	12.1424	4.9062	5.47056	7.16345
Solyc01g050020	0	0.901486	0.214323	0.600208	0.641616	0.21064	0	0.208807	0	0.231114	0.224901	0
Solyc01g050040	17.013	20.2218	24.038	15.1055	16.6157	11.7549	17.0694	21.0204	20.2412	23.1395	30.5769	23.3273
Solyc01g050047	1.55203	2.71169	1.75355	1.54064	0.926397	1.41928	1.1352	1.60793	1.12457	1.55724	2.59779	3.32456
Solyc01g050050	0	0	0	0	0	0	0	0	0	0	0	0
Solyc01g050070	11.4075	10.5827	9.98522	11.1927	10.9057	10.5477	7.78751	7.66005	6.14314	6.2316	8.4567	8.2139
[truncated: 33,770 more rows]
