# Supplementary material for: Multi-Omics Analysis Reveals That SlERF.D6 Synergistically Regulates SGAs and Fruit Development
Source: Front Plant Sci. 2022 Apr 8;13:860577. doi: 10.3389/fpls.2022.860577 (PMC9024245; doi:10.3389/fpls.2022.860577)
Supplement: Supplementary file 6 [file Table_5.XLSX]

## Sheet: Supplementary Table 5
Supplementary Table 5. Division of gene modules in WGCNA.
Gene ID	Module
Solyc01g005000	black
Solyc01g005010	yellow
Solyc01g005020	greenyellow
Solyc01g005030	turquoise
Solyc01g005040	tan
Solyc01g005050	red
Solyc01g005070	red
Solyc01g005080	darkred
Solyc01g005090	brown
Solyc01g005100	tan
Solyc01g005110	yellow
Solyc01g005120	red
Solyc01g005130	green
Solyc01g005140	turquoise
Solyc01g005150	magenta
Solyc01g005160	black
Solyc01g005170	turquoise
Solyc01g005180	turquoise
Solyc01g005190	turquoise
Solyc01g005200	darkred
Solyc01g005210	turquoise
Solyc01g005220	darkorange
Solyc01g005230	royalblue
Solyc01g005240	cyan
Solyc01g005250	grey
Solyc01g005260	magenta
Solyc01g005270	brown
Solyc01g005280	midnightblue
Solyc01g005290	darkgrey
Solyc01g005295	purple
Solyc01g005300	tan
Solyc01g005310	orange
Solyc01g005320	magenta
Solyc01g005330	green
Solyc01g005340	turquoise
Solyc01g005350	red
Solyc01g005360	blue
Solyc01g005370	purple
Solyc01g005380	pink
Solyc01g005385	magenta
Solyc01g005390	brown
Solyc01g005400	turquoise
Solyc01g005410	tan
Solyc01g005420	tan
Solyc01g005430	red
Solyc01g005440	turquoise
Solyc01g005450	white
Solyc01g005460	magenta
Solyc01g005470	pink
Solyc01g005480	magenta
Solyc01g005490	yellow
Solyc01g005500	pink
Solyc01g005510	red
Solyc01g005520	yellow
Solyc01g005530	magenta
Solyc01g005540	yellow
Solyc01g005550	magenta
Solyc01g005560	brown
Solyc01g005570	magenta
Solyc01g005575	black
Solyc01g005590	magenta
Solyc01g005600	turquoise
Solyc01g005610	red
Solyc01g005620	magenta
Solyc01g005630	pink
Solyc01g005640	turquoise
Solyc01g005650	blue
Solyc01g005660	cyan
Solyc01g005665	red
Solyc01g005670	turquoise
Solyc01g005680	pink
Solyc01g005690	darkgreen
Solyc01g005700	greenyellow
Solyc01g005710	yellow
Solyc01g005715	yellow
Solyc01g005720	yellow
Solyc01g005730	yellow
Solyc01g005750	midnightblue
Solyc01g005760	darkorange
Solyc01g005770	blue
Solyc01g005775	darkorange
Solyc01g005790	greenyellow
Solyc01g005795	turquoise
Solyc01g005800	brown
Solyc01g005810	turquoise
Solyc01g005820	pink
Solyc01g005825	darkorange
Solyc01g005830	green
Solyc01g005840	grey60
Solyc01g005850	blue
Solyc01g005860	salmon
Solyc01g005865	yellow
Solyc01g005870	yellow
Solyc01g005880	salmon
Solyc01g005890	salmon
Solyc01g005895	pink
Solyc01g005900	pink
Solyc01g005910	yellow
Solyc01g005920	pink
Solyc01g005930	turquoise
Solyc01g005940	brown
Solyc01g005950	magenta
Solyc01g005960	turquoise
Solyc01g005970	brown
Solyc01g005980	purple
Solyc01g005990	green
Solyc01g006000	turquoise
Solyc01g006010	turquoise
Solyc01g006020	yellow
Solyc01g006040	turquoise
Solyc01g006050	red
Solyc01g006060	pink
Solyc01g006070	blue
Solyc01g006080	black
Solyc01g006090	pink
Solyc01g006100	green
Solyc01g006110	turquoise
Solyc01g006120	turquoise
Solyc01g006130	yellow
Solyc01g006140	green
Solyc01g006150	turquoise
Solyc01g006160	lightgreen
Solyc01g006170	turquoise
Solyc01g006180	turquoise
Solyc01g006190	tan
Solyc01g006195	turquoise
Solyc01g006200	turquoise
Solyc01g006210	green
Solyc01g006220	green
Solyc01g006230	purple
Solyc01g006240	magenta
Solyc01g006250	turquoise
Solyc01g006260	purple
Solyc01g006280	magenta
Solyc01g006290	lightcyan
Solyc01g006300	lightcyan
Solyc01g006310	brown
Solyc01g006320	yellow
Solyc01g006330	yellow
Solyc01g006340	turquoise
Solyc01g006350	turquoise
Solyc01g006360	turquoise
Solyc01g006370	green
Solyc01g006380	brown
Solyc01g006390	blue
Solyc01g006400	green
Solyc01g006410	pink
Solyc01g006420	pink
Solyc01g006430	turquoise
Solyc01g006440	blue
Solyc01g006450	darkgreen
Solyc01g006460	skyblue
Solyc01g006470	midnightblue
Solyc01g006480	turquoise
Solyc01g006490	turquoise
Solyc01g006500	tan
Solyc01g006510	yellow
Solyc01g006520	tan
Solyc01g006530	brown
Solyc01g006540	purple
Solyc01g006545	yellow
Solyc01g006550	darkorange
Solyc01g006560	yellow
Solyc01g006565	yellow
Solyc01g006570	tan
Solyc01g006575	green
Solyc01g006580	pink
Solyc01g006590	royalblue
Solyc01g006600	darkorange
Solyc01g006610	darkorange
Solyc01g006620	pink
Solyc01g006630	green
Solyc01g006640	salmon
Solyc01g006650	magenta
Solyc01g006660	salmon
Solyc01g006670	purple
Solyc01g006680	blue
Solyc01g006690	turquoise
Solyc01g006700	greenyellow
Solyc01g006710	turquoise
Solyc01g006720	yellow
Solyc01g006730	red
Solyc01g006735	red
Solyc01g006740	green
Solyc01g006750	red
Solyc01g006760	red
Solyc01g006770	black
Solyc01g006780	red
Solyc01g006790	red
Solyc01g006800	turquoise
Solyc01g006810	green
Solyc01g006820	black
Solyc01g006825	magenta
Solyc01g006830	magenta
Solyc01g006840	brown
Solyc01g006850	darkturquoise
Solyc01g006860	turquoise
Solyc01g006870	midnightblue
Solyc01g006880	turquoise
Solyc01g006890	black
Solyc01g006900	darkgreen
Solyc01g006910	salmon
Solyc01g006920	greenyellow
Solyc01g006925	turquoise
Solyc01g006930	brown
Solyc01g006940	yellow
Solyc01g006950	brown
Solyc01g006960	turquoise
Solyc01g006970	turquoise
Solyc01g006980	green
Solyc01g006990	yellow
Solyc01g006997	salmon
Solyc01g007000	brown
Solyc01g007010	brown
Solyc01g007020	brown
Solyc01g007025	brown
Solyc01g007030	brown
Solyc01g007040	brown
Solyc01g007050	tan
Solyc01g007060	black
Solyc01g007070	turquoise
Solyc01g007080	green
Solyc01g007090	lightcyan
Solyc01g007100	yellow
Solyc01g007110	turquoise
Solyc01g007120	darkturquoise
Solyc01g007130	brown
Solyc01g007140	turquoise
Solyc01g007150	greenyellow
Solyc01g007160	green
Solyc01g007170	green
Solyc01g007180	turquoise
Solyc01g007190	grey60
Solyc01g007200	blue
Solyc01g007210	red
Solyc01g007220	turquoise
Solyc01g007230	blue
Solyc01g007240	red
Solyc01g007250	turquoise
Solyc01g007260	brown
Solyc01g007265	yellow
Solyc01g007270	blue
Solyc01g007740	turquoise
Solyc01g007750	yellow
Solyc01g007760	turquoise
Solyc01g007770	pink
Solyc01g007780	pink
Solyc01g007790	blue
Solyc01g007800	blue
Solyc01g007810	blue
Solyc01g007830	blue
Solyc01g007840	grey
Solyc01g007850	turquoise
Solyc01g007855	yellow
Solyc01g007860	lightcyan
Solyc01g007870	blue
Solyc01g007880	greenyellow
Solyc01g007890	yellow
Solyc01g007895	pink
Solyc01g007900	turquoise
Solyc01g007910	salmon
Solyc01g007920	turquoise
Solyc01g007930	turquoise
Solyc01g007940	royalblue
Solyc01g007950	red
Solyc01g007955	blue
Solyc01g007960	lightyellow
Solyc01g007970	lightyellow
Solyc01g007980	tan
Solyc01g007990	darkorange
Solyc01g008000	cyan
Solyc01g008005	darkorange
Solyc01g008010	red
Solyc01g008020	magenta
Solyc01g008030	pink
Solyc01g008040	red
Solyc01g008050	brown
Solyc01g008060	magenta
Solyc01g008070	purple
Solyc01g008080	lightgreen
Solyc01g008090	lightgreen
Solyc01g008100	blue
Solyc01g008110	green
Solyc01g008120	turquoise
Solyc01g008130	brown
Solyc01g008140	turquoise
Solyc01g008150	yellow
Solyc01g008160	darkgrey
Solyc01g008170	turquoise
Solyc01g008180	magenta
Solyc01g008190	turquoise
Solyc01g008200	black
Solyc01g008220	black
Solyc01g008230	greenyellow
Solyc01g008240	red
Solyc01g008250	yellow
Solyc01g008260	turquoise
Solyc01g008270	lightgreen
Solyc01g008280	purple
Solyc01g008290	turquoise
Solyc01g008300	green
Solyc01g008310	turquoise
Solyc01g008320	turquoise
Solyc01g008330	green
Solyc01g008340	turquoise
Solyc01g008350	blue
Solyc01g008360	yellow
Solyc01g008370	turquoise
Solyc01g008390	tan
Solyc01g008400	turquoise
Solyc01g008410	darkorange
Solyc01g008415	brown
Solyc01g008420	turquoise
Solyc01g008430	black
Solyc01g008440	red
Solyc01g008450	salmon
Solyc01g008460	turquoise
Solyc01g008470	green
Solyc01g008471	red
Solyc01g008472	purple
Solyc01g008474	royalblue
Solyc01g008476	purple
Solyc01g008478	darkturquoise
Solyc01g008480	turquoise
Solyc01g008485	turquoise
Solyc01g008490	turquoise
Solyc01g008493	turquoise
Solyc01g008497	tan
Solyc01g008510	steelblue
Solyc01g008520	tan
Solyc01g008530	magenta
Solyc01g008540	steelblue
Solyc01g008550	magenta
Solyc01g008560	grey60
Solyc01g008570	darkred
Solyc01g008580	blue
Solyc01g008600	green
Solyc01g008610	red
Solyc01g008620	tan
Solyc01g008640	pink
Solyc01g008650	brown
Solyc01g008660	turquoise
Solyc01g008670	red
Solyc01g008680	red
Solyc01g008690	pink
Solyc01g008700	purple
Solyc01g008710	darkgrey
Solyc01g008720	black
Solyc01g008730	turquoise
Solyc01g008740	red
Solyc01g008760	turquoise
Solyc01g008770	green
Solyc01g008780	yellow
Solyc01g008790	midnightblue
Solyc01g008800	turquoise
Solyc01g008810	pink
Solyc01g008820	pink
Solyc01g008830	yellow
Solyc01g008840	turquoise
Solyc01g008850	turquoise
Solyc01g008860	cyan
Solyc01g008870	pink
Solyc01g008880	black
Solyc01g008890	turquoise
Solyc01g008900	greenyellow
Solyc01g008910	turquoise
Solyc01g008920	yellow
Solyc01g008925	yellow
Solyc01g008930	blue
Solyc01g008940	cyan
Solyc01g008950	brown
Solyc01g008960	green
Solyc01g008970	turquoise
Solyc01g008973	skyblue
Solyc01g008977	turquoise
Solyc01g008980	turquoise
Solyc01g008990	turquoise
Solyc01g009000	cyan
Solyc01g009010	darkgrey
Solyc01g009020	darkgrey
Solyc01g009030	turquoise
Solyc01g009040	green
Solyc01g009050	turquoise
Solyc01g009060	red
Solyc01g009070	turquoise
Solyc01g009080	yellow
Solyc01g009090	turquoise
Solyc01g009100	lightgreen
Solyc01g009120	turquoise
Solyc01g009150	greenyellow
Solyc01g009160	brown
Solyc01g009170	turquoise
Solyc01g009180	turquoise
Solyc01g009190	blue
Solyc01g009200	magenta
Solyc01g009210	salmon
Solyc01g009215	salmon
Solyc01g009220	magenta
Solyc01g009230	greenyellow
Solyc01g009235	magenta
Solyc01g009240	red
Solyc01g009245	yellow
Solyc01g009250	red
Solyc01g009260	yellow
Solyc01g009270	yellow
Solyc01g009280	turquoise
Solyc01g009290	turquoise
Solyc01g009300	magenta
Solyc01g009307	blue
Solyc01g009310	pink
Solyc01g009320	brown
Solyc01g009330	yellow
Solyc01g009335	steelblue
Solyc01g009340	green
Solyc01g009360	blue
Solyc01g009370	salmon
Solyc01g009380	turquoise
Solyc01g009390	turquoise
Solyc01g009400	pink
Solyc01g009410	salmon
Solyc01g009420	cyan
Solyc01g009430	darkred
Solyc01g009440	pink
Solyc01g009450	turquoise
Solyc01g009470	royalblue
Solyc01g009480	red
Solyc01g009490	blue
Solyc01g009500	salmon
Solyc01g009510	black
Solyc01g009520	lightgreen
Solyc01g009530	steelblue
Solyc01g009540	pink
Solyc01g009550	green
Solyc01g009560	pink
Solyc01g009565	saddlebrown
Solyc01g009570	saddlebrown
Solyc01g009580	pink
Solyc01g009590	blue
Solyc01g009600	red
Solyc01g009610	darkgreen
Solyc01g009620	greenyellow
Solyc01g009630	turquoise
Solyc01g009635	pink
Solyc01g009645	pink
Solyc01g009660	royalblue
Solyc01g009670	yellow
Solyc01g009680	tan
Solyc01g009690	tan
Solyc01g009695	lightcyan
Solyc01g009700	tan
Solyc01g009710	cyan
Solyc01g009715	magenta
Solyc01g009720	magenta
Solyc01g009730	magenta
Solyc01g009740	red
Solyc01g009750	turquoise
Solyc01g009760	pink
Solyc01g009770	blue
Solyc01g009780	grey60
Solyc01g009790	red
Solyc01g009810	tan
Solyc01g009820	turquoise
Solyc01g009830	pink
Solyc01g009845	brown
Solyc01g009850	blue
Solyc01g009860	tan
Solyc01g009870	black
Solyc01g009880	red
Solyc01g009890	blue
Solyc01g009900	orange
Solyc01g009910	blue
Solyc01g009920	blue
Solyc01g009930	tan
Solyc01g009935	brown
Solyc01g009940	black
Solyc01g009960	darkred
Solyc01g009970	yellow
Solyc01g009990	yellow
Solyc01g010000	black
Solyc01g010020	brown
Solyc01g010030	magenta
Solyc01g010035	green
Solyc01g010050	yellow
Solyc01g010055	lightcyan
Solyc01g010060	black
Solyc01g010080	brown
Solyc01g010083	blue
Solyc01g010087	cyan
Solyc01g010090	black
Solyc01g010135	red
Solyc01g010140	red
Solyc01g010150	blue
Solyc01g010160	purple
Solyc01g010170	purple
Solyc01g010180	black
Solyc01g010190	cyan
Solyc01g010200	cyan
Solyc01g010220	black
Solyc01g010230	magenta
Solyc01g010240	blue
Solyc01g010250	turquoise
Solyc01g010260	brown
Solyc01g010270	cyan
Solyc01g010280	red
Solyc01g010290	lightyellow
Solyc01g010295	brown
Solyc01g010310	darkgreen
Solyc01g010315	blue
Solyc01g010350	brown
Solyc01g010360	red
Solyc01g010370	green
Solyc01g010390	blue
Solyc01g010393	pink
Solyc01g010400	blue
Solyc01g010410	purple
Solyc01g010420	turquoise
Solyc01g010430	grey60
Solyc01g010440	turquoise
Solyc01g010460	yellow
Solyc01g010465	yellow
Solyc01g010470	yellow
Solyc01g010480	tan
Solyc01g010490	purple
Solyc01g010493	darkgrey
Solyc01g010500	blue
Solyc01g010502	turquoise
Solyc01g010504	pink
Solyc01g010506	cyan
Solyc01g010508	black
Solyc01g010510	blue
Solyc01g010520	green
Solyc01g010525	green
Solyc01g010530	blue
Solyc01g010540	lightgreen
Solyc01g010570	turquoise
Solyc01g010580	brown
Solyc01g010590	lightgreen
Solyc01g010600	orange
Solyc01g010640	yellow
Solyc01g010650	red
Solyc01g010660	grey60
Solyc01g010670	darkred
Solyc01g010690	turquoise
Solyc01g010700	turquoise
Solyc01g010710	pink
Solyc01g010720	brown
Solyc01g010740	red
Solyc01g010750	pink
Solyc01g010760	turquoise
Solyc01g010770	tan
Solyc01g010780	darkred
Solyc01g010790	blue
Solyc01g010793	blue
Solyc01g010797	salmon
Solyc01g010810	red
Solyc01g010820	turquoise
Solyc01g010830	brown
Solyc01g010835	brown
Solyc01g010860	turquoise
Solyc01g010870	turquoise
Solyc01g010880	red
Solyc01g010890	red
Solyc01g010900	blue
Solyc01g010910	green
Solyc01g010920	purple
Solyc01g010930	greenyellow
Solyc01g010933	greenyellow
Solyc01g010937	blue
Solyc01g010940	brown
Solyc01g010950	red
Solyc01g010970	magenta
Solyc01g010980	red
Solyc01g010990	greenyellow
Solyc01g011000	pink
Solyc01g011010	black
Solyc01g011020	pink
Solyc01g011025	brown
Solyc01g011030	red
Solyc01g011040	black
Solyc01g011050	red
Solyc01g011060	tan
Solyc01g011070	cyan
Solyc01g011080	turquoise
Solyc01g011090	skyblue
Solyc01g011091	turquoise
Solyc01g011092	royalblue
Solyc01g011095	yellow
Solyc01g011097	cyan
Solyc01g011098	midnightblue
Solyc01g011170	red
Solyc01g011180	skyblue
Solyc01g011190	black
Solyc01g011195	salmon
Solyc01g011200	red
Solyc01g011220	royalblue
Solyc01g011225	turquoise
Solyc01g011230	greenyellow
Solyc01g011237	blue
Solyc01g011333	turquoise
Solyc01g011335	lightcyan
Solyc01g011340	greenyellow
Solyc01g011350	cyan
Solyc01g011370	tan
Solyc01g011390	red
Solyc01g011393	royalblue
Solyc01g011397	darkgreen
Solyc01g011410	turquoise
Solyc01g011415	blue
Solyc01g011430	brown
Solyc01g011460	black
Solyc01g011490	blue
Solyc01g011497	blue
Solyc01g011500	red
Solyc01g011510	red
Solyc01g012580	cyan
Solyc01g012690	tan
Solyc01g012700	blue
Solyc01g012760	blue
Solyc01g013810	steelblue
Solyc01g013870	red
Solyc01g013880	pink
Solyc01g013885	blue
Solyc01g013890	red
Solyc01g013895	white
Solyc01g013995	black
Solyc01g014060	blue
Solyc01g014065	blue
Solyc01g014070	blue
Solyc01g014075	black
Solyc01g014090	pink
Solyc01g014100	midnightblue
Solyc01g014103	yellow
Solyc01g014107	lightyellow
Solyc01g014130	darkred
Solyc01g014140	tan
Solyc01g014143	tan
Solyc01g014147	black
Solyc01g014150	tan
Solyc01g014170	tan
Solyc01g014180	turquoise
Solyc01g014220	midnightblue
Solyc01g014225	black
Solyc01g014230	turquoise
Solyc01g014245	turquoise
Solyc01g014250	turquoise
Solyc01g014260	darkgrey
Solyc01g014270	brown
Solyc01g014300	saddlebrown
Solyc01g014310	darkred
Solyc01g014320	yellow
Solyc01g014360	black
Solyc01g014375	yellow
Solyc01g014390	tan
Solyc01g014393	pink
Solyc01g014397	midnightblue
Solyc01g014470	darkred
Solyc01g014480	turquoise
Solyc01g014490	darkred
Solyc01g014495	greenyellow
Solyc01g014510	pink
Solyc01g014520	skyblue
Solyc01g014530	purple
Solyc01g014534	red
Solyc01g014550	purple
Solyc01g014560	purple
Solyc01g014561	royalblue
Solyc01g014562	darkorange
Solyc01g014568	magenta
Solyc01g014620	magenta
Solyc01g014680	purple
Solyc01g014690	steelblue
Solyc01g014700	steelblue
Solyc01g014705	cyan
Solyc01g014710	red
Solyc01g014720	midnightblue
Solyc01g014725	darkgrey
Solyc01g014730	brown
Solyc01g014740	magenta
Solyc01g014820	red
Solyc01g014840	grey60
Solyc01g014850	brown
Solyc01g014860	turquoise
Solyc01g014910	black
Solyc01g014960	midnightblue
Solyc01g014980	black
Solyc01g014990	black
Solyc01g015000	black
Solyc01g015010	black
Solyc01g015020	turquoise
Solyc01g015040	cyan
Solyc01g015070	black
Solyc01g015080	brown
Solyc01g015085	yellow
Solyc01g015210	cyan
Solyc01g015240	black
Solyc01g015250	black
Solyc01g015285	steelblue
Solyc01g016300	magenta
Solyc01g016360	yellow
Solyc01g016370	yellow
Solyc01g016380	red
Solyc01g016390	red
Solyc01g016400	purple
Solyc01g016410	purple
Solyc01g016413	green
Solyc01g016430	brown
Solyc01g016435	salmon
Solyc01g016455	black
Solyc01g016470	lightgreen
Solyc01g016520	salmon
Solyc01g016540	white
Solyc01g016550	turquoise
Solyc01g016610	red
Solyc01g016620	black
Solyc01g016630	cyan
Solyc01g016650	blue
Solyc01g016660	midnightblue
Solyc01g016697	blue
Solyc01g016720	turquoise
Solyc01g016760	pink
Solyc01g016770	blue
Solyc01g016780	blue
Solyc01g016800	turquoise
Solyc01g016805	turquoise
Solyc01g016880	midnightblue
Solyc01g016970	red
Solyc01g017030	pink
Solyc01g017050	darkred
Solyc01g017070	yellow
Solyc01g017080	brown
Solyc01g017083	red
Solyc01g017087	darkred
Solyc01g017090	brown
Solyc01g017100	skyblue
Solyc01g017110	salmon
Solyc01g017130	skyblue
Solyc01g017140	brown
Solyc01g017150	brown
Solyc01g017170	yellow
Solyc01g017187	midnightblue
Solyc01g017200	skyblue
Solyc01g017210	white
Solyc01g017220	yellow
Solyc01g017230	salmon
Solyc01g017240	brown
Solyc01g017300	blue
Solyc01g017330	green
Solyc01g017333	cyan
Solyc01g017337	salmon
Solyc01g017370	darkturquoise
Solyc01g017380	royalblue
Solyc01g017400	royalblue
Solyc01g017440	brown
Solyc01g017460	turquoise
Solyc01g017485	turquoise
Solyc01g017490	tan
Solyc01g017500	brown
Solyc01g017530	tan
Solyc01g017540	blue
Solyc01g017560	salmon
Solyc01g017567	turquoise
Solyc01g017570	skyblue
Solyc01g017600	magenta
Solyc01g017610	yellow
Solyc01g017640	blue
Solyc01g017660	pink
Solyc01g017710	lightyellow
Solyc01g017720	blue
Solyc01g017730	red
Solyc01g017735	black
Solyc01g017740	yellow
Solyc01g017750	orange
Solyc01g017760	magenta
Solyc01g017770	blue
Solyc01g017775	blue
Solyc01g017790	black
Solyc01g017823	black
Solyc01g017850	pink
Solyc01g017860	turquoise
Solyc01g017870	blue
Solyc01g018010	tan
Solyc01g018020	red
Solyc01g018025	pink
Solyc01g018090	blue
Solyc01g020110	red
Solyc01g020115	purple
Solyc01g020125	lightcyan
Solyc01g020130	lightcyan
Solyc01g020150	lightcyan
Solyc01g020155	lightcyan
Solyc01g020160	lightcyan
Solyc01g020170	black
Solyc01g020190	brown
Solyc01g020200	pink
Solyc01g020220	turquoise
Solyc01g020230	tan
Solyc01g020240	turquoise
Solyc01g020285	turquoise
Solyc01g020290	pink
Solyc01g020320	grey
Solyc01g020340	greenyellow
Solyc01g020360	blue
Solyc01g020371	black
Solyc01g020374	darkgrey
Solyc01g020376	brown
Solyc01g020378	lightyellow
Solyc01g020400	blue
Solyc01g020440	green
Solyc01g020445	red
Solyc01g020460	black
Solyc01g020500	turquoise
Solyc01g020520	green
Solyc01g020525	turquoise
Solyc01g020570	lightcyan
Solyc01g021600	pink
Solyc01g021610	darkgrey
Solyc01g021640	turquoise
Solyc01g021670	purple
Solyc01g021675	purple
Solyc01g021690	black
Solyc01g021700	salmon
Solyc01g021720	turquoise
Solyc01g021730	blue
Solyc01g021740	midnightblue
Solyc01g022740	tan
Solyc01g022750	lightgreen
Solyc01g022780	cyan
Solyc01g028800	darkgreen
Solyc01g028805	yellow
Solyc01g028810	turquoise
Solyc01g028830	brown
Solyc01g028860	turquoise
Solyc01g028870	brown
Solyc01g028900	turquoise
Solyc01g028930	turquoise
Solyc01g028935	turquoise
Solyc01g028983	darkred
Solyc01g028987	black
Solyc01g033990	black
Solyc01g034010	black
Solyc01g034020	magenta
Solyc01g034023	midnightblue
Solyc01g034050	yellow
Solyc01g034080	blue
Solyc01g034150	lightyellow
Solyc01g034155	turquoise
Solyc01g034170	midnightblue
Solyc01g035220	pink
Solyc01g035225	salmon
Solyc01g044240	turquoise
Solyc01g044270	turquoise
Solyc01g044307	turquoise
Solyc01g044340	red
Solyc01g044350	pink
Solyc01g044360	turquoise
Solyc01g044370	tan
Solyc01g044371	cyan
Solyc01g044372	cyan
Solyc01g044373	brown
Solyc01g044374	blue
Solyc01g044420	brown
Solyc01g044480	turquoise
Solyc01g044510	royalblue
Solyc01g044520	black
Solyc01g044540	pink
Solyc01g044565	black
Solyc01g047580	lightcyan
Solyc01g047590	black
Solyc01g047597	black
Solyc01g048590	yellow
Solyc01g049650	darkgreen
Solyc01g049680	lightyellow
Solyc01g049685	turquoise
Solyc01g049690	turquoise
Solyc01g049743	red
Solyc01g049745	red
Solyc01g049747	blue
Solyc01g049760	blue
Solyc01g049770	tan
Solyc01g049810	blue
Solyc01g049820	lightcyan
Solyc01g049825	lightcyan
Solyc01g049840	lightcyan
Solyc01g049880	tan
Solyc01g049890	turquoise
Solyc01g049910	turquoise
Solyc01g049912	turquoise
Solyc01g049914	pink
Solyc01g049920	pink
Solyc01g049925	lightyellow
Solyc01g049960	green
Solyc01g049970	red
Solyc01g049975	greenyellow
Solyc01g050010	tan
Solyc01g050020	red
Solyc01g050040	grey60
Solyc01g050047	turquoise
Solyc01g050050	lightcyan
Solyc01g050070	greenyellow
Solyc01g050075	turquoise
Solyc01g055160	red
Solyc01g056200	pink
Solyc01g056220	red
Solyc01g056240	green
Solyc01g056250	red
Solyc01g056260	green
Solyc01g056270	green
Solyc01g056280	blue
Solyc01g056290	blue
Solyc01g056310	red
Solyc01g056320	turquoise
Solyc01g056330	skyblue
Solyc01g056340	turquoise
Solyc01g056360	red
Solyc01g056370	black
Solyc01g056380	blue
Solyc01g056390	blue
Solyc01g056400	blue
Solyc01g056410	blue
Solyc01g056430	blue
Solyc01g056440	blue
Solyc01g056450	blue
Solyc01g056460	red
Solyc01g056470	white
Solyc01g056480	turquoise
Solyc01g056485	red
Solyc01g056520	turquoise
Solyc01g056530	royalblue
Solyc01g056570	turquoise
Solyc01g056580	red
Solyc01g056620	turquoise
Solyc01g056625	turquoise
Solyc01g056640	cyan
Solyc01g056655	darkgrey
Solyc01g056660	blue
Solyc01g056670	pink
Solyc01g056690	turquoise
Solyc01g056720	red
Solyc01g056725	turquoise
Solyc01g056730	greenyellow
Solyc01g056750	turquoise
Solyc01g056760	turquoise
Solyc01g056770	tan
Solyc01g056780	yellow
Solyc01g056790	green
Solyc01g056810	green
Solyc01g056830	brown
Solyc01g056840	green
Solyc01g056850	blue
Solyc01g056870	blue
Solyc01g056875	red
Solyc01g056883	royalblue
Solyc01g056885	black
Solyc01g056887	royalblue
Solyc01g056890	brown
Solyc01g056910	brown
Solyc01g056940	lightgreen
Solyc01g056970	blue
Solyc01g056990	green
Solyc01g057000	purple
Solyc01g057010	blue
Solyc01g057020	greenyellow
Solyc01g057030	darkturquoise
Solyc01g057040	yellow
Solyc01g057070	brown
Solyc01g057080	black
Solyc01g057090	turquoise
Solyc01g057100	blue
Solyc01g057150	red
Solyc01g057160	lightcyan
Solyc01g057170	royalblue
Solyc01g057180	red
Solyc01g057190	blue
Solyc01g057200	yellow
Solyc01g057210	yellow
Solyc01g057220	red
Solyc01g057250	blue
Solyc01g057260	yellow
Solyc01g057270	blue
Solyc01g057275	blue
Solyc01g057280	salmon
Solyc01g057300	black
Solyc01g057310	green
Solyc01g057320	green
Solyc01g057330	pink
Solyc01g057340	black
Solyc01g057350	black
Solyc01g057360	green
Solyc01g057370	black
Solyc01g057380	red
Solyc01g057390	red
Solyc01g057430	turquoise
Solyc01g057440	turquoise
Solyc01g057460	pink
Solyc01g057465	red
Solyc01g057470	brown
Solyc01g057473	magenta
Solyc01g057475	white
Solyc01g057477	turquoise
Solyc01g057480	red
Solyc01g057490	turquoise
Solyc01g057510	blue
Solyc01g057520	green
Solyc01g057525	green
Solyc01g057530	brown
Solyc01g057535	lightyellow
Solyc01g057560	pink
Solyc01g057570	black
Solyc01g057580	black
Solyc01g057590	blue
Solyc01g057600	black
Solyc01g057640	pink
Solyc01g057680	red
Solyc01g057685	red
Solyc01g057690	black
Solyc01g057700	red
Solyc01g057705	royalblue
Solyc01g057720	red
Solyc01g057740	blue
Solyc01g057743	midnightblue
Solyc01g057745	black
Solyc01g057747	black
Solyc01g057760	turquoise
Solyc01g057770	black
Solyc01g057780	turquoise
Solyc01g057805	blue
Solyc01g057830	yellow
Solyc01g057840	pink
Solyc01g057850	turquoise
Solyc01g057852	red
Solyc01g057854	royalblue
Solyc01g057856	royalblue
Solyc01g057900	turquoise
Solyc01g057910	brown
Solyc01g057960	yellow
Solyc01g058000	darkturquoise
Solyc01g058010	magenta
Solyc01g058020	salmon
Solyc01g058030	yellow
Solyc01g058040	yellow
Solyc01g058050	salmon
Solyc01g058060	blue
Solyc01g058070	green
Solyc01g058080	blue
Solyc01g058100	magenta
Solyc01g058140	turquoise
Solyc01g058160	blue
Solyc01g058170	yellow
Solyc01g058190	turquoise
Solyc01g058200	magenta
Solyc01g058210	turquoise
Solyc01g058220	red
Solyc01g058230	purple
Solyc01g058240	royalblue
Solyc01g058250	brown
Solyc01g058260	turquoise
Solyc01g058270	darkgreen
Solyc01g058280	turquoise
Solyc01g058320	darkgreen
Solyc01g058350	black
Solyc01g058360	brown
Solyc01g058363	black
Solyc01g058380	black
Solyc01g058390	brown
Solyc01g058400	royalblue
Solyc01g058410	royalblue
Solyc01g058450	turquoise
Solyc01g058470	darkred
Solyc01g058500	pink
Solyc01g058510	darkgrey
Solyc01g058520	blue
Solyc01g058530	green
Solyc01g058540	black
Solyc01g058595	cyan
Solyc01g058650	darkred
Solyc01g058660	green
Solyc01g058670	darkgreen
Solyc01g058690	tan
Solyc01g058720	brown
Solyc01g058730	turquoise
Solyc01g058733	darkred
Solyc01g058735	turquoise
Solyc01g058740	cyan
Solyc01g059740	black
Solyc01g059760	cyan
Solyc01g059800	black
Solyc01g059820	blue
Solyc01g059830	purple
Solyc01g059840	midnightblue
Solyc01g059850	royalblue
Solyc01g059853	green
Solyc01g059860	lightyellow
Solyc01g059870	green
Solyc01g059880	green
Solyc01g059884	red
Solyc01g059900	blue
Solyc01g059920	green
Solyc01g059930	brown
Solyc01g059950	midnightblue
Solyc01g059960	brown
Solyc01g059965	pink
Solyc01g059967	royalblue
Solyc01g059990	pink
Solyc01g060030	turquoise
Solyc01g060040	turquoise
Solyc01g060050	turquoise
Solyc01g060070	blue
Solyc01g060080	turquoise
Solyc01g060085	turquoise
Solyc01g060130	black
Solyc01g060140	turquoise
Solyc01g060160	turquoise
Solyc01g060170	turquoise
Solyc01g060180	yellow
Solyc01g060185	turquoise
Solyc01g060200	orange
Solyc01g060205	pink
Solyc01g060210	turquoise
Solyc01g060215	turquoise
Solyc01g060220	red
Solyc01g060240	red
Solyc01g060245	greenyellow
Solyc01g060250	turquoise
Solyc01g060260	pink
Solyc01g060270	blue
Solyc01g060280	turquoise
Solyc01g060300	red
Solyc01g060314	royalblue
Solyc01g060340	red
Solyc01g060350	turquoise
Solyc01g060355	red
Solyc01g060380	blue
Solyc01g060390	black
Solyc01g060400	green
Solyc01g060410	green
Solyc01g060415	green
Solyc01g060430	magenta
Solyc01g060450	green
Solyc01g060455	orange
Solyc01g060460	green
Solyc01g060470	turquoise
Solyc01g060490	green
Solyc01g065490	turquoise
Solyc01g065495	turquoise
Solyc01g065500	green
Solyc01g065510	magenta
Solyc01g065540	brown
Solyc01g065550	red
Solyc01g065560	greenyellow
Solyc01g065577	royalblue
Solyc01g065580	turquoise
Solyc01g065590	white
Solyc01g065610	darkturquoise
Solyc01g065645	black
Solyc01g065680	darkgreen
Solyc01g065690	pink
Solyc01g065700	pink
Solyc01g065710	green
Solyc01g065720	turquoise
Solyc01g065740	purple
Solyc01g065770	yellow
Solyc01g065780	red
Solyc01g065790	cyan
Solyc01g065795	yellow
Solyc01g065800	saddlebrown
Solyc01g065810	blue
Solyc01g065820	yellow
Solyc01g065830	darkred
Solyc01g065840	turquoise
Solyc01g065843	pink
Solyc01g065900	darkgrey
Solyc01g065910	blue
Solyc01g065915	midnightblue
Solyc01g065960	brown
Solyc01g065980	purple
Solyc01g065985	black
Solyc01g066000	darkturquoise
Solyc01g066010	blue
Solyc01g066020	blue
Solyc01g066040	tan
Solyc01g066050	yellow
Solyc01g066060	turquoise
Solyc01g066070	red
Solyc01g066080	darkgreen
Solyc01g066100	black
Solyc01g066110	black
Solyc01g066120	black
Solyc01g066150	black
Solyc01g066160	darkred
Solyc01g066190	tan
Solyc01g066200	tan
Solyc01g066207	midnightblue
Solyc01g066260	tan
Solyc01g066270	tan
Solyc01g066280	tan
Solyc01g066290	tan
Solyc01g066310	turquoise
Solyc01g066330	red
Solyc01g066340	black
Solyc01g066360	red
Solyc01g066380	red
Solyc01g066400	red
Solyc01g066410	red
Solyc01g066420	red
Solyc01g066430	brown
Solyc01g066440	midnightblue
Solyc01g066450	brown
Solyc01g066453	black
Solyc01g066457	red
Solyc01g066480	midnightblue
Solyc01g066490	blue
Solyc01g066500	blue
Solyc01g066510	blue
Solyc01g066513	blue
Solyc01g066515	blue
Solyc01g066517	orange
Solyc01g066520	yellow
Solyc01g066525	greenyellow
Solyc01g066560	red
Solyc01g066570	midnightblue
Solyc01g066590	purple
Solyc01g066610	green
Solyc01g066613	yellow
Solyc01g066620	blue
Solyc01g066640	midnightblue
Solyc01g066680	yellow
Solyc01g066690	turquoise
Solyc01g066700	blue
Solyc01g066710	turquoise
Solyc01g066720	purple
Solyc01g066730	midnightblue
Solyc01g066740	darkgreen
Solyc01g066760	green
Solyc01g066770	red
Solyc01g066790	lightyellow
Solyc01g066795	red
Solyc01g066810	red
Solyc01g066820	lightcyan
Solyc01g066830	turquoise
Solyc01g066840	lightgreen
Solyc01g066850	magenta
Solyc01g066860	magenta
Solyc01g066870	yellow
Solyc01g066880	yellow
Solyc01g066890	tan
Solyc01g066900	green
Solyc01g066910	midnightblue
Solyc01g066917	blue
Solyc01g066940	brown
Solyc01g066950	brown
Solyc01g066970	pink
Solyc01g067000	brown
Solyc01g067010	brown
Solyc01g067020	tan
Solyc01g067025	grey60
Solyc01g067030	turquoise
Solyc01g067040	blue
Solyc01g067070	red
Solyc01g067080	purple
Solyc01g067090	darkturquoise
Solyc01g067100	turquoise
Solyc01g067103	turquoise
Solyc01g067107	turquoise
Solyc01g067120	yellow
Solyc01g067125	yellow
Solyc01g067130	brown
Solyc01g067140	darkturquoise
Solyc01g067160	orange
Solyc01g067165	green
Solyc01g067170	green
Solyc01g067180	green
Solyc01g067190	green
Solyc01g067210	blue
Solyc01g067215	green
Solyc01g067220	green
Solyc01g067230	green
Solyc01g067250	magenta
Solyc01g067273	turquoise
Solyc01g067275	yellow
Solyc01g067277	red
Solyc01g067280	tan
Solyc01g067295	red
Solyc01g067300	pink
Solyc01g067320	steelblue
Solyc01g067330	tan
Solyc01g067340	blue
Solyc01g067350	blue
Solyc01g067360	brown
Solyc01g067370	red
Solyc01g067380	cyan
Solyc01g067390	turquoise
Solyc01g067400	brown
Solyc01g067410	red
Solyc01g067417	black
Solyc01g067420	red
Solyc01g067440	pink
Solyc01g067460	yellow
Solyc01g067480	green
Solyc01g067490	darkred
Solyc01g067500	greenyellow
Solyc01g067510	green
Solyc01g067520	red
Solyc01g067530	turquoise
Solyc01g067540	pink
Solyc01g067550	grey
Solyc01g067560	turquoise
Solyc01g067570	turquoise
Solyc01g067580	brown
Solyc01g067590	turquoise
Solyc01g067600	turquoise
Solyc01g067610	turquoise
Solyc01g067620	pink
Solyc01g067630	yellow
Solyc01g067640	magenta
Solyc01g067650	royalblue
Solyc01g067660	purple
Solyc01g067680	purple
Solyc01g067690	green
Solyc01g067700	blue
Solyc01g067710	magenta
Solyc01g067720	lightyellow
Solyc01g067730	lightgreen
Solyc01g067740	purple
Solyc01g067750	brown
Solyc01g067780	black
Solyc01g067790	green
Solyc01g067800	cyan
Solyc01g067810	steelblue
Solyc01g067820	yellow
Solyc01g067830	purple
Solyc01g067840	lightcyan
Solyc01g067850	pink
Solyc01g067860	salmon
Solyc01g067870	salmon
Solyc01g067880	midnightblue
Solyc01g067890	brown
Solyc01g067900	green
Solyc01g067905	steelblue
Solyc01g067910	purple
Solyc01g067930	grey60
Solyc01g067940	pink
Solyc01g067945	magenta
Solyc01g067980	tan
Solyc01g067990	green
Solyc01g068000	grey60
Solyc01g068020	yellow
Solyc01g068030	yellow
Solyc01g068040	blue
Solyc01g068050	greenyellow
Solyc01g068060	yellow
Solyc01g068065	yellow
Solyc01g068070	turquoise
Solyc01g068080	blue
Solyc01g068100	turquoise
Solyc01g068120	red
Solyc01g068130	red
Solyc01g068140	magenta
Solyc01g068150	blue
Solyc01g068155	black
Solyc01g068160	greenyellow
Solyc01g068170	lightyellow
Solyc01g068180	turquoise
Solyc01g068190	yellow
Solyc01g068200	magenta
Solyc01g068210	turquoise
Solyc01g068240	turquoise
Solyc01g068250	brown
Solyc01g068260	blue
Solyc01g068263	blue
Solyc01g068267	greenyellow
Solyc01g068270	cyan
Solyc01g068280	green
Solyc01g068290	turquoise
Solyc01g068320	blue
Solyc01g068330	turquoise
Solyc01g068340	green
Solyc01g068350	magenta
Solyc01g068360	brown
Solyc01g068365	magenta
Solyc01g068370	turquoise
Solyc01g068380	brown
Solyc01g068390	turquoise
Solyc01g068400	turquoise
Solyc01g068410	salmon
Solyc01g068420	salmon
Solyc01g068430	black
Solyc01g068440	red
Solyc01g068450	turquoise
Solyc01g068470	yellow
Solyc01g068475	yellow
Solyc01g068480	turquoise
Solyc01g068490	turquoise
Solyc01g068500	turquoise
Solyc01g068510	pink
Solyc01g068520	pink
Solyc01g068530	lightgreen
Solyc01g068540	green
Solyc01g068560	black
Solyc01g068580	turquoise
Solyc01g068590	darkred
Solyc01g068620	yellow
Solyc01g068630	red
Solyc01g068640	brown
Solyc01g073640	turquoise
Solyc01g073650	turquoise
Solyc01g073660	lightyellow
Solyc01g073670	brown
Solyc01g073680	magenta
Solyc01g073690	red
Solyc01g073710	salmon
Solyc01g073720	brown
Solyc01g073725	pink
Solyc01g073730	turquoise
Solyc01g073740	brown
Solyc01g073745	skyblue
Solyc01g073750	turquoise
Solyc01g073755	blue
Solyc01g073770	turquoise
Solyc01g073780	pink
Solyc01g073800	pink
Solyc01g073810	brown
Solyc01g073820	brown
Solyc01g073830	brown
Solyc01g073840	brown
Solyc01g073860	salmon
Solyc01g073870	turquoise
Solyc01g073880	tan
Solyc01g073890	brown
Solyc01g073900	turquoise
Solyc01g073910	tan
Solyc01g073920	blue
Solyc01g073930	greenyellow
Solyc01g073940	greenyellow
Solyc01g073950	turquoise
Solyc01g073960	turquoise
Solyc01g073970	black
Solyc01g073980	blue
Solyc01g074000	green
Solyc01g074010	greenyellow
Solyc01g074020	turquoise
Solyc01g074030	magenta
Solyc01g074040	brown
Solyc01g079060	darkred
Solyc01g079080	black
Solyc01g079090	yellow
Solyc01g079100	green
Solyc01g079110	green
Solyc01g079120	skyblue
Solyc01g079130	blue
Solyc01g079140	blue
Solyc01g079150	red
Solyc01g079160	brown
Solyc01g079170	lightcyan
Solyc01g079180	green
Solyc01g079190	blue
Solyc01g079200	brown
Solyc01g079210	black
Solyc01g079220	yellow
Solyc01g079230	turquoise
Solyc01g079235	turquoise
Solyc01g079240	blue
Solyc01g079250	turquoise
Solyc01g079260	darkturquoise
Solyc01g079270	red
Solyc01g079280	brown
Solyc01g079290	lightyellow
Solyc01g079300	red
Solyc01g079310	green
Solyc01g079320	turquoise
Solyc01g079330	turquoise
Solyc01g079340	greenyellow
Solyc01g079350	turquoise
Solyc01g079360	tan
Solyc01g079370	magenta
Solyc01g079375	lightcyan
Solyc01g079380	grey60
Solyc01g079385	turquoise
Solyc01g079390	turquoise
Solyc01g079400	darkgreen
Solyc01g079410	green
Solyc01g079420	pink
Solyc01g079425	turquoise
Solyc01g079430	turquoise
Solyc01g079450	turquoise
Solyc01g079460	salmon
Solyc01g079470	yellow
Solyc01g079480	darkturquoise
Solyc01g079500	greenyellow
Solyc01g079507	green
Solyc01g079510	turquoise
Solyc01g079520	green
Solyc01g079530	darkred
Solyc01g079540	yellow
Solyc01g079550	pink
Solyc01g079560	lightcyan
Solyc01g079570	magenta
Solyc01g079580	yellow
Solyc01g079590	darkgrey
Solyc01g079600	darkturquoise
Solyc01g079610	black
Solyc01g079620	purple
Solyc01g079630	blue
Solyc01g079640	greenyellow
Solyc01g079650	turquoise
Solyc01g079670	salmon
Solyc01g079680	blue
Solyc01g079690	turquoise
Solyc01g079700	turquoise
Solyc01g079710	turquoise
Solyc01g079720	turquoise
Solyc01g079740	white
Solyc01g079750	green
Solyc01g079760	purple
Solyc01g079780	yellow
Solyc01g079790	yellow
Solyc01g079800	yellow
Solyc01g079810	grey60
Solyc01g079820	green
Solyc01g079830	green
Solyc01g079840	turquoise
Solyc01g079850	green
Solyc01g079860	purple
Solyc01g079865	green
Solyc01g079870	turquoise
Solyc01g079880	tan
Solyc01g079890	blue
Solyc01g079900	brown
Solyc01g079910	salmon
Solyc01g079920	salmon
Solyc01g079930	salmon
Solyc01g079940	salmon
Solyc01g079950	magenta
Solyc01g079960	salmon
Solyc01g079970	salmon
Solyc01g079980	magenta
Solyc01g080000	cyan
Solyc01g080010	black
Solyc01g080020	cyan
Solyc01g080030	steelblue
Solyc01g080040	turquoise
Solyc01g080050	yellow
Solyc01g080070	green
Solyc01g080080	magenta
Solyc01g080100	magenta
Solyc01g080110	turquoise
Solyc01g080120	midnightblue
Solyc01g080130	magenta
Solyc01g080140	black
Solyc01g080150	red
Solyc01g080160	pink
Solyc01g080170	turquoise
Solyc01g080180	turquoise
Solyc01g080200	brown
Solyc01g080210	purple
Solyc01g080220	brown
Solyc01g080230	brown
Solyc01g080240	magenta
Solyc01g080250	turquoise
Solyc01g080260	orange
Solyc01g080270	turquoise
Solyc01g080280	yellow
Solyc01g080290	magenta
Solyc01g080300	brown
Solyc01g080310	greenyellow
Solyc01g080320	greenyellow
Solyc01g080330	brown
Solyc01g080340	turquoise
Solyc01g080350	greenyellow
Solyc01g080360	turquoise
Solyc01g080363	turquoise
Solyc01g080367	red
Solyc01g080370	red
Solyc01g080380	magenta
Solyc01g080400	red
Solyc01g080410	darkgrey
Solyc01g080415	darkgrey
Solyc01g080430	turquoise
Solyc01g080450	turquoise
Solyc01g080460	purple
Solyc01g080470	tan
Solyc01g080480	brown
Solyc01g080490	steelblue
Solyc01g080500	brown
Solyc01g080510	yellow
Solyc01g080520	red
Solyc01g080530	lightgreen
Solyc01g080540	brown
Solyc01g080550	blue
Solyc01g080570	pink
Solyc01g080580	brown
Solyc01g080590	purple
Solyc01g080600	green
Solyc01g080610	blue
Solyc01g080620	turquoise
Solyc01g080640	turquoise
Solyc01g080660	turquoise
Solyc01g080670	turquoise
Solyc01g080680	black
Solyc01g080690	turquoise
Solyc01g080700	green
Solyc01g080705	yellow
Solyc01g080720	turquoise
Solyc01g080725	black
Solyc01g080760	turquoise
Solyc01g080770	magenta
Solyc01g080780	yellow
Solyc01g080787	green
Solyc01g080790	green
Solyc01g080800	yellow
Solyc01g080810	yellow
Solyc01g080820	blue
Solyc01g080830	yellow
Solyc01g080840	yellow
Solyc01g080850	turquoise
Solyc01g080860	turquoise
Solyc01g080870	lightcyan
Solyc01g080880	turquoise
Solyc01g080890	turquoise
Solyc01g080900	cyan
Solyc01g080910	cyan
Solyc01g080920	pink
Solyc01g080930	purple
Solyc01g080940	turquoise
Solyc01g080950	blue
Solyc01g080960	brown
Solyc01g080970	red
Solyc01g080990	red
Solyc01g081000	blue
Solyc01g081010	turquoise
Solyc01g081020	yellow
Solyc01g081030	turquoise
Solyc01g081040	lightcyan
Solyc01g081050	turquoise
Solyc01g081060	purple
Solyc01g081070	purple
Solyc01g081080	magenta
Solyc01g081090	blue
Solyc01g081100	blue
Solyc01g081110	turquoise
Solyc01g081115	blue
Solyc01g081120	turquoise
Solyc01g081130	orange
Solyc01g081140	blue
Solyc01g081150	pink
Solyc01g081160	yellow
Solyc01g081170	yellow
Solyc01g081173	yellow
Solyc01g081175	blue
Solyc01g081177	lightyellow
Solyc01g081180	saddlebrown
Solyc01g081190	tan
Solyc01g081200	turquoise
Solyc01g081210	pink
Solyc01g081220	darkgrey
Solyc01g081240	red
Solyc01g081250	black
Solyc01g081260	brown
Solyc01g081270	brown
Solyc01g081280	yellow
Solyc01g081290	greenyellow
Solyc01g081293	brown
Solyc01g081297	turquoise
Solyc01g081300	purple
Solyc01g081310	purple
Solyc01g081320	black
Solyc01g081330	turquoise
Solyc01g081340	red
Solyc01g081350	black
Solyc01g081360	red
Solyc01g081370	black
Solyc01g081380	green
Solyc01g081390	green
Solyc01g081410	green
Solyc01g081420	turquoise
Solyc01g081430	turquoise
Solyc01g081440	brown
Solyc01g081450	pink
Solyc01g081460	turquoise
Solyc01g081470	yellow
Solyc01g081480	yellow
Solyc01g081490	yellow
Solyc01g081500	greenyellow
Solyc01g081510	turquoise
Solyc01g081520	turquoise
Solyc01g081530	blue
Solyc01g081535	blue
Solyc01g081540	magenta
Solyc01g081545	turquoise
Solyc01g081560	greenyellow
Solyc01g081570	magenta
Solyc01g081580	red
Solyc01g081590	red
Solyc01g081600	pink
Solyc01g081610	darkgrey
Solyc01g081620	pink
Solyc01g081630	brown
Solyc01g081640	blue
Solyc01g086640	brown
Solyc01g086650	brown
Solyc01g086660	grey60
Solyc01g086670	white
Solyc01g086680	pink
Solyc01g086690	green
Solyc01g086700	blue
Solyc01g086710	turquoise
Solyc01g086720	magenta
Solyc01g086730	brown
Solyc01g086740	turquoise
Solyc01g086750	turquoise
Solyc01g086755	green
Solyc01g086760	black
Solyc01g086790	blue
Solyc01g086800	midnightblue
Solyc01g086810	turquoise
Solyc01g086820	blue
Solyc01g086830	blue
Solyc01g086840	yellow
Solyc01g086845	skyblue
Solyc01g086850	turquoise
Solyc01g086860	tan
Solyc01g086870	tan
Solyc01g086890	turquoise
Solyc01g086893	turquoise
Solyc01g086895	turquoise
Solyc01g086897	blue
Solyc01g086900	yellow
Solyc01g086920	midnightblue
Solyc01g086930	green
Solyc01g086950	turquoise
Solyc01g086953	turquoise
Solyc01g086957	turquoise
Solyc01g086960	grey60
Solyc01g086970	turquoise
Solyc01g086980	turquoise
Solyc01g086990	turquoise
Solyc01g086995	turquoise
Solyc01g087000	turquoise
Solyc01g087003	turquoise
Solyc01g087007	turquoise
Solyc01g087010	salmon
Solyc01g087020	grey60
Solyc01g087030	turquoise
Solyc01g087035	purple
Solyc01g087040	yellow
Solyc01g087050	yellow
Solyc01g087060	purple
Solyc01g087070	blue
Solyc01g087080	green
Solyc01g087090	skyblue
Solyc01g087095	blue
Solyc01g087120	midnightblue
Solyc01g087130	lightcyan
Solyc01g087140	salmon
Solyc01g087150	salmon
Solyc01g087160	pink
Solyc01g087170	turquoise
Solyc01g087180	turquoise
Solyc01g087190	yellow
Solyc01g087200	magenta
Solyc01g087210	darkgreen
Solyc01g087230	tan
Solyc01g087235	blue
Solyc01g087240	magenta
Solyc01g087250	purple
Solyc01g087260	turquoise
Solyc01g087270	yellow
Solyc01g087280	pink
Solyc01g087290	yellow
Solyc01g087300	turquoise
Solyc01g087320	turquoise
Solyc01g087330	pink
Solyc01g087332	blue
Solyc01g087336	turquoise
Solyc01g087338	magenta
Solyc01g087340	turquoise
Solyc01g087360	blue
Solyc01g087380	lightyellow
Solyc01g087385	turquoise
Solyc01g087400	turquoise
Solyc01g087410	turquoise
Solyc01g087420	turquoise
Solyc01g087430	turquoise
Solyc01g087440	red
Solyc01g087450	red
Solyc01g087460	red
Solyc01g087470	pink
Solyc01g087480	darkturquoise
Solyc01g087490	turquoise
Solyc01g087500	green
Solyc01g087510	brown
Solyc01g087520	yellow
Solyc01g087530	greenyellow
Solyc01g087540	salmon
Solyc01g087550	turquoise
Solyc01g087560	purple
Solyc01g087565	darkred
Solyc01g087570	grey
Solyc01g087580	brown
Solyc01g087590	black
Solyc01g087600	darkgreen
Solyc01g087610	greenyellow
Solyc01g087620	brown
Solyc01g087630	brown
Solyc01g087640	turquoise
Solyc01g087650	greenyellow
Solyc01g087670	turquoise
Solyc01g087680	yellow
Solyc01g087690	yellow
Solyc01g087700	blue
Solyc01g087710	yellow
Solyc01g087720	turquoise
Solyc01g087730	yellow
Solyc01g087740	magenta
Solyc01g087750	yellow
Solyc01g087770	green
Solyc01g087775	yellow
Solyc01g087780	green
Solyc01g087785	tan
Solyc01g087790	yellow
Solyc01g087800	yellow
Solyc01g087810	yellow
Solyc01g087820	yellow
Solyc01g087830	pink
Solyc01g087840	darkred
Solyc01g087850	magenta
Solyc01g087860	magenta
Solyc01g087870	magenta
Solyc01g087880	pink
Solyc01g087890	purple
Solyc01g087900	pink
Solyc01g087910	turquoise
Solyc01g087920	black
Solyc01g087940	magenta
Solyc01g087950	purple
Solyc01g087960	blue
Solyc01g087970	turquoise
Solyc01g087980	brown
Solyc01g087990	red
Solyc01g087995	tan
Solyc01g088000	cyan
Solyc01g088005	cyan
Solyc01g088010	royalblue
Solyc01g088020	turquoise
Solyc01g088030	lightgreen
Solyc01g088040	black
Solyc01g088050	yellow
Solyc01g088060	greenyellow
Solyc01g088080	greenyellow
Solyc01g088090	purple
Solyc01g088100	brown
Solyc01g088110	brown
Solyc01g088120	salmon
Solyc01g088130	cyan
Solyc01g088140	black
Solyc01g088150	magenta
Solyc01g088160	brown
Solyc01g088170	turquoise
Solyc01g088180	salmon
Solyc01g088200	salmon
Solyc01g088230	brown
Solyc01g088240	purple
Solyc01g088245	turquoise
Solyc01g088250	lightcyan
Solyc01g088260	red
Solyc01g088270	red
Solyc01g088280	blue
Solyc01g088290	green
Solyc01g088300	lightcyan
Solyc01g088310	black
Solyc01g088320	green
Solyc01g088323	green
Solyc01g088327	blue
Solyc01g088330	blue
Solyc01g088340	blue
Solyc01g088350	green
Solyc01g088370	turquoise
Solyc01g088380	green
Solyc01g088390	green
Solyc01g088400	purple
Solyc01g088410	blue
Solyc01g088420	green
Solyc01g088430	blue
Solyc01g088440	brown
Solyc01g088450	grey60
Solyc01g088480	magenta
Solyc01g088490	turquoise
Solyc01g088500	magenta
Solyc01g088505	magenta
Solyc01g088520	turquoise
Solyc01g088530	magenta
Solyc01g088540	lightcyan
Solyc01g088550	brown
Solyc01g088560	black
Solyc01g088570	lightgreen
Solyc01g088580	red
Solyc01g088590	darkgrey
Solyc01g088600	green
Solyc01g088610	green
Solyc01g088620	darkgreen
Solyc01g088630	green
Solyc01g088640	turquoise
Solyc01g088650	cyan
Solyc01g088660	cyan
Solyc01g088670	midnightblue
Solyc01g088680	brown
Solyc01g088690	brown
Solyc01g088700	turquoise
Solyc01g088710	grey60
Solyc01g088720	turquoise
Solyc01g088730	turquoise
Solyc01g088740	turquoise
Solyc01g088750	turquoise
Solyc01g088760	turquoise
Solyc01g088780	magenta
Solyc01g088790	blue
Solyc01g088800	turquoise
Solyc01g088810	lightyellow
Solyc01g088820	red
Solyc01g088830	brown
Solyc01g089840	green
Solyc01g089850	green
Solyc01g089855	pink
Solyc01g089860	pink
Solyc01g089870	turquoise
Solyc01g089880	tan
Solyc01g089890	tan
Solyc01g089900	turquoise
Solyc01g089903	turquoise
Solyc01g089907	turquoise
Solyc01g089910	blue
Solyc01g089920	blue
Solyc01g089930	blue
Solyc01g089940	blue
Solyc01g089950	cyan
Solyc01g089960	green
Solyc01g089970	lightgreen
Solyc01g089980	red
Solyc01g089990	orange
Solyc01g090000	blue
Solyc01g090010	blue
Solyc01g090020	blue
Solyc01g090030	blue
Solyc01g090040	blue
Solyc01g090050	blue
Solyc01g090060	blue
Solyc01g090070	blue
Solyc01g090080	blue
Solyc01g090090	blue
Solyc01g090100	blue
Solyc01g090110	blue
Solyc01g090120	pink
Solyc01g090130	brown
Solyc01g090135	darkred
Solyc01g090140	blue
Solyc01g090150	royalblue
Solyc01g090160	turquoise
Solyc01g090170	pink
Solyc01g090180	magenta
Solyc01g090190	green
Solyc01g090200	turquoise
Solyc01g090210	brown
Solyc01g090225	turquoise
Solyc01g090230	magenta
Solyc01g090240	magenta
Solyc01g090250	greenyellow
Solyc01g090260	lightyellow
Solyc01g090270	magenta
Solyc01g090280	turquoise
Solyc01g090290	turquoise
Solyc01g090300	black
Solyc01g090310	black
Solyc01g090320	black
Solyc01g090340	turquoise
Solyc01g090350	royalblue
Solyc01g090360	royalblue
Solyc01g090370	pink
Solyc01g090380	turquoise
Solyc01g090390	greenyellow
Solyc01g090400	magenta
Solyc01g090410	turquoise
Solyc01g090420	greenyellow
Solyc01g090425	greenyellow
Solyc01g090430	turquoise
Solyc01g090440	magenta
Solyc01g090450	magenta
Solyc01g090460	lightcyan
Solyc01g090470	turquoise
Solyc01g090480	turquoise
Solyc01g090500	yellow
Solyc01g090510	greenyellow
Solyc01g090515	pink
Solyc01g090520	black
Solyc01g090530	blue
Solyc01g090540	midnightblue
Solyc01g090550	purple
Solyc01g090560	pink
Solyc01g090590	purple
Solyc01g090600	blue
[truncated: 29,018 more rows]
