# Supplementary material for: Multi-Omics Analysis Reveals That SlERF.D6 Synergistically Regulates SGAs and Fruit Development
Source: Front Plant Sci. 2022 Apr 8;13:860577. doi: 10.3389/fpls.2022.860577 (PMC9024245; doi:10.3389/fpls.2022.860577)
Supplement: Supplementary file 7 [file Table_6.XLSX]

## Sheet: Supplementary Table 6
Supplementary Table 6. The content of SGAs in tomato fruit population.
TS	Group	SlFM0902	SlFM0903	SlFM0911	SlFM0964	SlFM1417	SlFM1442	SlFM1443	SlFM1468	SlFM1741	SlFM1785	SlFM1923	SlFM1977	SlFM1978	SlFM1979	SlFM1980	SlFM1981	SlFM1982	SlFM1987	SlFM1988	SlFM1989	SlFM1990	SlFM1991	SlFM1992	SlFM1994	SlFM1997	SlFM1998
TS-101	BIG	44324.7	39172.9	51004.2	558659	105853	9876.25	33076.4	111686	4814.67	3286.61	7805.85	9093.3	4835.7	8222.7	11831.1	3783.9	4586.1	6806.45	3745.9	234937	11909.7	118814	30528.3	27396.5	67515.9	8215.6
TS-103	BIG	6575.86	9727.45	36831.6	348962	28445	5056.25	16351.3	68054.4	2064.15	1327.29	3363.23	2033	1150.5	4122.2	3764.9	3228.9	3935.25	4449.35	1032.2	142169	7177.85	46029.7	14426.5	7433.2	28105.6	3724.2
TS-104	BIG	49030	72764.9	295887	322113	180624	35903.9	184360	66572.8	27965.5	10796.9	27895.8	18474	7437.95	24883.5	26567.4	22314.8	26922.4	17626.8	4942.95	32373.5	32147.9	15242.8	75658.4	19708.2	16489.7	2126.8
TS-105	CER	53381.4	62876.4	104148	1.55883e+06	672631	15292.1	55414.6	314467	1933.6	6865.57	8601.42	14368.4	3404	13029.5	15991.3	8635.12	7754.6	28134	11058.9	1.24747e+06	29577.1	285529	119215	519152	247544	11336.5
TS-106	CER	98517.6	146710	196479	3.35916e+06	16211.8	28078.8	121796	562600	13380.4	9228.55	20743.7	30986.3	8975.15	26381.5	40739.2	10607.9	17698.8	6.18611e+06	3.29116e+06	5.62381e+06	6.56407e+06	1.84996e+06	2.01617e+07	507.1	814.7	NA
TS-108	BIG	41019.5	49854.3	178262	661264	125270	22680.2	99449	130225	17716.1	10592.2	22081.5	13999.1	4133.85	13985.4	17394.2	19976	15158.4	21526.3	8467.5	188393	38147.4	84349	92552.2	31697	41843.9	3609.95
TS-109	CER	4550.07	3640.3	10134.7	922753	52146.3	1488.95	8051.2	178648	217.761	920.148	5103.47	413.153	684.25	563.84	1145.95	1872.5	1716.27	2551.2	3256.35	227562	3219.2	83635.4	17202.3	25193.4	30689.7	4251.65
TS-111	BIG	54091.8	53031.9	161786	1.30892e+06	237629	25988.5	106333	277944	11962.8	8962	13541.5	11177.6	2840.5	11375.7	19664.7	15159.1	11249.5	21759.5	5973.95	633045	29958.8	214387	79267	23985.9	69085.6	6559.9
TS-112	BIG	33010.7	31867.6	35304.4	493022	53097.9	4349.4	16786.3	93282.1	1822.55	1620.3	2434.63	8903.4	822.9	6573.15	11216.5	2323.37	2060.89	5757.25	3003.8	222931	9483.85	108828	24010.2	29762.3	47391.5	3702.35
TS-113	BIG	17641.4	29809.9	84165.9	1.14102e+06	192634	9198	50653.9	195379	7811.05	2518.85	11133	6407.4	3433.75	10068.6	14161.9	5960.35	5739.8	7085.45	4332.35	505552	12884.7	196645	49469.4	15958.8	35496.9	4755.2
TS-114	BIG	18668.3	25993.5	61576.8	624428	98415.6	7340.85	37944.3	105724	4722.55	2774.15	7237.15	4315.9	681	5952.95	7526.9	3755.36	6465.9	9300.25	4353.45	275444	10189.3	90167	26444.3	18510.9	32817.8	6860.15
TS-115	BIG	66521.9	90149.1	55147.5	371891	98462.3	7108.8	30551.6	74140.6	4584.1	3109.7	7955.2	23541	6626.9	26950.2	37961.8	4614.44	5037.2	3985.4	2553.75	118229	8475.45	42336.4	15169.5	12319.5	64719.9	3981.6
TS-116	CER	56172.6	58496.6	153428	2.66028e+06	17208.8	25003.5	77670.1	515775	6614.15	8644.45	22076.2	16666.1	3302	15552.8	19430.8	10834.5	10565.1	5.89952e+06	3.15797e+06	7.03006e+06	6.05647e+06	2.45193e+06	1.90361e+07	439.889	NA	NA
TS-117	BIG	21321.2	25405.9	72737.8	676836	198337	11118.6	44208.8	156429	5086.35	4393.7	7165.35	4587.25	1604.75	5027.6	6852.7	5560	6246.25	18114.4	6446	250498	31629.5	75663.1	72152.8	22157	28545.6	2347.55
TS-120	CER	14032	15935.2	15061.6	735167	85793.5	2388.04	10872.2	187351	1607.95	3203.86	9674	4079.52	1145.95	4372.55	3680.3	2318.4	2300.7	6635.9	4261.25	490893	11921.8	184838	34621.2	41734.7	83990.7	6918.85
TS-122	BIG	22090.4	27643.4	73199	937083	146705	7206.2	41607.7	191762	5136.45	2351.5	9418.21	4263.45	1608.6	8261.75	8379.85	5292.65	7148.65	12453.4	6317.1	351105	14607.1	117349	49137.7	5307.55	29899.1	4957.8
TS-123	PIM	123106	161967	1.02803e+06	1.31584e+06	346495	169720	635443	191455	78109.3	47324.2	131460	62869.9	17900.4	57626.3	87978.1	66842.5	76020.9	89476.6	45842.9	2.05911e+06	123040	580765	358680	104822	183537	14627.9
TS-125	BIG	37221.4	39226.1	108021	973258	747169	14024.2	53539.9	214871	9947	4391.8	6935.35	10355.9	3659.2	12365.4	9879.8	9715.3	4166.6	30784	11741.1	850126	33447.6	294903	112332	36235.7	76419.4	6357.5
TS-128	BIG	30780.8	32865.6	93700.8	539574	120230	11210.5	59615.6	92219.4	9026.55	2324	7284.25	8930.95	2305.3	11112.6	16536	6009.55	7857.3	15131.8	4081.45	180129	14323.6	67129.5	46061.3	6388.24	32227.3	3855.4
TS-129	CER	2.719e+06	3.15017e+06	5.76082e+06	358231	1.14573e+06	911978	3.34383e+06	92469.5	503072	240251	626358	768503	273958	807106	1.20576e+06	1.41714e+06	1.59983e+06	533448	245888	922830	617524	342221	1.96937e+06	NA	799.75	NA
TS-130	BIG	4856.3	4985.55	41459.8	216408	48923.5	4172.3	23148.1	52203.1	2313.4	2085.6	4900.54	2299.25	456.7	4150.15	1375.3	4390	2779.35	3815.5	2208.45	168742	6035.6	63795.6	17183.6	4514.7	11208.9	4354.75
TS-131	CER	24794.9	11955.4	29808.8	966768	115603	2058.6	11793	204190	1389	2830.51	2288.36	3405.6	2751.05	4158.25	5168	3705.35	1576.07	13095.6	5466.8	906286	11351.7	338481	38326.2	69654.4	175910	7218.95
TS-132	BIG	51305.6	60084.6	195118	645143	242462	29120.5	126544	73756.7	15981.6	5877.05	24480.5	19089.2	3898.5	16101.5	28009.1	18606.3	18682.8	13541.5	8048.15	309099	24218.4	98667.7	83162	16106	44780.2	6052.85
TS-133	BIG	66332.6	80940.3	323935	479994	278324	52786.9	209521	77556.6	29696.2	16414.9	43463.1	21588	6440.85	20667.8	27787.3	19852.3	22297.3	21790.4	8897.15	193877	30602.5	64987.4	119728	14202.6	27493.4	4582
TS-134	CER	49823.3	54777	115370	974677	194464	16501.3	80737.5	130157	8100.7	5681.3	21145.2	8768.8	3920.8	10359.6	22708.6	9043.35	10939.2	2.11311e+06	1.05908e+06	2.27044e+06	2.29966e+06	849504	7.45503e+06	46019.1	113459	9420
TS-135	BIG	27323.1	22790.2	70790.9	278063	47037	8800.2	37289.4	57674.9	5318.4	2814.51	13248.9	6663.05	1380.9	8505	15410.2	7173.55	7891.4	7270.55	5622.7	142368	13876.2	58165	42529.1	14476.7	35717.2	2800.2
TS-136	BIG	24161.7	31745.1	71241.8	1.37695e+06	724414	8767.45	39409.1	288897	5560.2	2791.87	11402.6	7372.4	1600.6	5505.6	9863.25	3841.75	5564.6	25165.9	11642.5	629969	38147.9	320398	129481	19312.1	38815.3	6516.35
TS-137	BIG	37968.3	38626	104715	648968	462726	17014.2	54365.5	168735	6271.65	2174.99	9248.95	15221.9	2532.8	9937.55	18466.5	8839.75	5620.15	12156.6	3765.65	317991	18557.5	140436	44237.3	1246.08	61708.4	6758.5
TS-138	CER	1192.76	3117.98	23149.8	130608	44089.8	3014.25	4303.94	26600.7	2068.9	1319.39	1899.75	1834.55	367.537	1385.4	1006.87	1831.7	2567.4	5144.5	1904.3	26764.4	8400.75	11239.7	22961.5	144190	28419.1	4054.15
TS-139	BIG	20696.7	17714.7	126080	365164	174865	14416.6	78672.4	76903.1	14090.6	7006.2	21724.8	7452.45	2786.2	7224.9	12572.2	9734.3	11298.4	11896.2	4129.7	226108	19133.7	76207.1	45362.6	52553.8	37808	5352.05
TS-140	BIG	37458.5	36007.3	74105.2	313907	34817.7	8064.4	43805.2	95198.1	5684.6	4920.05	15638.1	10405.7	5327.65	7865.35	13905.8	5907.85	6622.9	10065.5	4104.2	249517	8780.3	75519.7	37888.8	17569	22031.9	1989.9
TS-141	BIG	44374.5	38680.8	218958	560770	257250	27800.8	124625	122929	19534.8	8590.45	26887	12908.5	5723.6	9900.2	22068.8	19736.5	18826.1	12028	7446.05	254250	26262.8	106142	70999	28352.3	29912.5	5541.85
TS-142	BIG	15252.3	18039.8	42018.1	719707	151112	4888.35	22146.1	133654	5583.4	2088.3	4192.65	4850.5	1857.65	3453.15	4837.2	4015.62	5816.2	21423.8	9636.15	466630	29764	127776	82876.7	30555.4	26481.3	4762.9
TS-143	BIG	208829	223540	171551	33019	122656	25358.5	111974	4682.47	3462	7277.15	2125.95	52148.4	22154.8	1891.3	93474.4	3565.52	7494.1	14961.8	8089	140555	13388.4	102170	22873	40178.8	42963.3	2164.15
TS-147	BIG	29363.2	33705	159621	62007.6	195990	18815.2	95371.9	4971.98	15162.7	2610.05	3958.9	10737.5	5479.9	1343.7	13717	4631.6	4566.55	14442.4	3679.55	202839	6440.35	60957.1	55424.3	34779.6	38923.5	6135.55
TS-148	CER	74970	95243.2	167560	95375.4	631399	23280.8	87096.3	149459	13678.3	10832	14547.2	25721.8	5728	18044.3	28240.6	24579.5	42391.9	29665	15796.1	3.7813e+06	29017.8	259728	867104	60156.4	312616	19058.8
TS-151	BIG	25340.4	30423.3	55273.6	98829.1	465711	6622.4	33395.7	15412.7	959	4959	12101.8	4691.25	1412.5	5627.25	8742.4	8447.55	15608.5	20896.7	8063.2	261134	12161.5	103308	44984.7	87118.1	48829.7	5096.35
TS-152	BIG	5286.15	8157.3	10168.2	45702.3	71275.9	1190.1	3754.3	9810.12	714.65	1824.2	2130.15	2113.95	711.35	916.35	2138.45	7086.5	6174.3	2758.3	1156.4	54297.3	1877.3	15150	18496.7	33056.1	26286.7	2404.35
TS-153	BIG	364482	444134	1.33812e+06	512038	2.73238e+06	203312	839521	100233	6033.9	49621	3296.1	157284	47830.6	5838.6	188060	11378.7	11925.4	256521	125981	283262	249396	1.92029e+06	65020.9	3288.6	7220.85	1071.75
TS-155	BIG	9508.2	3946.8	29882.9	56216.3	85011.1	2107.45	8913.5	8549.41	3708.05	1827.95	956.75	3380.35	1379.3	1116.55	4555.25	3430.65	3183.6	4635.6	1164.35	200668	2841.7	22083.6	48924.1	19269	28456.5	3762.85
TS-157	BIG	5939.35	8652.2	24317.5	25692.8	73983.7	5316.4	8987.8	63290.7	5818	2082.25	2592.05	2145.8	719.55	1804.55	5236	5921.5	4091.7	2990.65	911.95	110189	2300.05	27237.4	15837.1	11902.3	21267.8	802.6
TS-158	CER	26451.3	33428.9	60373.4	126363	219213	10777.2	37873.3	17839	3543.95	5485.65	6822.1	7231.9	2705.4	12173.4	10748.6	38234.2	63094.5	16974.1	14083.6	1.5557e+06	14345.9	147619	417357	82334.9	123887	10948
TS-159	BIG	32085.2	36616	121604	53278.4	377870	18136.8	70979.6	18747	9635.05	5628.5	6775.6	11748	4327.35	4510.25	17028.8	8935.74	7936.9	9159.85	5538.9	257378	7855.1	89942.7	67128	28896.9	39253.1	2034.7
TS-161	BIG	20593.7	21703.8	40048.2	69825.7	130915	6361.4	31861.9	15466.9	3767.4	1900.6	3803.2	6704.5	2158.15	2269.5	11460.2	4473.05	5243.35	6003.45	3231.95	197043	4861.8	45397.4	36101.4	17212	35639.7	3479.5
TS-162	BIG	4503.9	4261.55	5900.15	21263.5	39477.3	1424.3	3641.2	2702.51	942.3	1424.85	1183.7	1805.45	473.5	NA	1549.9	938.75	2503.1	1616.7	895.7	91266.2	2256.95	8564.5	22088.2	13718.9	23385	2957.55
TS-163	BIG	29567.3	36982.4	108223	33875.7	69600.8	17371.6	65651.2	11281.5	31046.4	2558.7	3076.5	11501.9	2401.55	4746.55	13680.9	7269.35	11578.4	4396.75	1838.85	155928	2781.1	31800	30713.7	26145	23346.8	3764.95
TS-165	CER	18489.5	32077.8	53893.2	83052.9	450095	10068.8	29887	18804.4	1660.45	4892.55	11130	7240.65	2700.6	12632	8074.3	17060.8	49697.6	28660.2	13118.3	2.0455e+06	24373	201276	391795	18827.1	115768	8012.65
TS-167	BIG	15098.6	16972.9	69987.6	99720.4	183175	10829.9	46683.4	22778.1	12868	3870.15	8006.1	5294.25	2157	3939.75	4942	12057.4	15548.4	18953.8	8583.4	324102	12005.1	105635	89698.4	29147.8	58191	6178.75
TS-168	BIG	8915.6	8889.15	33261.8	58292.2	99145.2	2108.35	18201.2	9261.96	4940.6	4441.95	1653.7	1919.05	971.2	2026.65	4319.2	3878.35	2742.6	2544.6	1380.05	51132.9	1622.15	16808.9	13795.8	21033.8	19199.8	2692
TS-169	BIG	8112.8	8969.85	33769.3	230710	133159	5442.65	18534.3	66349.2	14173.1	4054.85	1302.2	4655.15	1646.95	1698.9	NA	1362.8	7025.65	3319.65	432.9	18212.5	1114.55	36719.6	8856.1	97069.2	49289.6	3737.45
TS-170	BIG	10742	12792.6	20709.1	267431	84305.3	1898.95	9975.95	64102.9	1421.75	3509.95	1826.65	3029.25	2321.8	685.5	784.5	1184	3913.25	5469.2	1739	116962	2396.4	33984.2	29953	53952.4	60365.8	3467.6
TS-171	BIG	63298.3	70685.7	277800	272665	373842	40705	171148	72026.7	24064.9	8568.7	17748.3	28348.6	8611.85	2730.4	781.75	23792.9	8035	13967.6	4588.45	61984.8	7027.6	138584	15234.8	108696	55201.1	5070.6
TS-172	BIG	31153.4	33246.8	111565	604823	151102	11190.1	72950.1	158467	1187.8	2746.5	6183.6	12934.9	4628.35	3183.6	3296.95	10679.9	7982.75	13278.5	3283.9	230107	10616.5	114245	42710.7	24450.5	74264.6	7467.8
TS-174	BIG	20731.4	27534.5	71386.7	721222	8.79338e+06	9002.2	38664.4	199041	3682.8	2019.25	5132.05	5781.15	2534.7	3189.35	8026.55	2505	9118.7	17506.4	6371.25	108155	10983.5	149796	20053.9	11935.8	15009.6	1863.3
TS-176	BIG	4847.8	7202.55	39134.1	480452	155980	4032.7	18502	126023	949.55	2164.4	3822.8	1607.65	NA	1821.75	3255.75	1182.45	5291.25	13351.3	3230.2	88254.6	4745.7	74847	22677.3	67195.8	52459	6681.45
TS-177	BIG	9067.75	7476.35	21997.7	27784.1	30044.9	3567.6	13793.3	6988.97	3814.25	955.35	1434.25	1867.45	946.3	697.85	2845.93	1675.5	2089.15	1977.6	2154.95	83012.8	1396.55	28057.9	17774.1	4060	12658	1596
TS-178	BIG	5626.5	10081.7	22327.9	27939.8	67938.2	3334.2	12020.5	12204.1	1433.95	2109.9	1905.2	2081.85	926.3	455.45	3973.18	1838.65	1381.55	4740.5	1921.95	26298.1	6296.8	20786.8	3625.2	20707	18064	798
TS-179	BIG	32388.1	35014.3	80994.8	94890.7	443265	12875.3	72938.6	22310.7	9262.2	5231.15	16898.5	12313.1	5990.7	4783.5	18990.2	9553.8	11555.7	25438	10741.6	272458	20438.8	157273	55563.9	22120.6	45483.1	6916.6
TS-180	BIG	24030.6	34704.9	106661	79974.4	371110	14731.5	66718.2	12737.5	10102.1	4380.75	15963.6	10399	6489.5	1824.65	13052.1	8797.85	9218.9	16560.8	5680.8	195027	9858.8	107283	23695.5	17263.5	32038.2	5082.25
TS-183	BIG	6982.7	9272.1	33734.1	94565.5	203068	1183.25	15836.4	21144.7	3331.6	1641	961.15	5371.65	1855.05	2051.1	2948.1	6254.25	4628.65	7810.7	1991	129936	3759.55	49609.3	27905.8	18555.5	15825.2	2133.75
TS-184	BIG	57140.5	62350.5	62012.7	972906	813702	8814.15	49344.6	212508	712.05	118872	2609.35	17286.9	8857.6	13808.8	766.9	715.8	24220.1	20863.5	10968.2	425205	15488.3	177543	101235	1.01202e+06	368645	13285.6
TS-185	BIG	77796.6	105050	286737	117796	1.15628e+06	51339.2	230012	37700.8	57040.5	15682	47309.6	26806.8	8332.6	3409	28232.4	28615.1	8747.2	43406.3	22631.4	163229	36391.1	314727	44118	39370.8	31004.5	1862.25
TS-186	BIG	53588.6	68166.5	292725	68019.6	157620	38573.7	204941	12864.9	58382.2	15488.4	57650.8	32114.4	9659.45	1815.8	33428.8	27905.9	2765.45	28410	10025.4	99205.7	10865.2	160685	17234.5	14640.4	15919.8	2397.1
TS-188	BIG	7121.7	11121.2	31330.5	46751.3	84799.8	4277.25	16871.4	12531.6	1911	2618.9	4769.3	2537.95	1856.75	1590.65	2301.2	5973	4583.5	6348.75	1738.8	102144	12904.4	65443.6	37577.7	14712	25327.2	3456.95
TS-189	CER	84769.4	90884.4	202296	707995	9216.8	36144.6	146286	168720	30239.2	6790.45	25193	35883	11562	6815.25	44970.5	8594.48	18707.5	3.61384e+06	1.90269e+06	2.77192e+06	2.43225e+06	1.59419e+07	446767	NA	1080.35	NA
TS-190	BIG	104166	101258	582418	387140	584601	96498.2	407533	29359.4	476	24226.8	72586.8	39818.9	14871.6	4780.9	1013.6	42895.6	11678.8	24818.2	12474.5	149589	28270.8	203948	49034.2	18338.4	34446.7	2932.05
TS-191	BIG	32495.9	32242.2	94228.8	796168	801426	13661.5	62389.8	51154.8	12002.3	6233.75	12619	9285	5346.5	5948.25	1218.69	6785.5	19982.5	29828.7	10230.4	798535	23602.9	202022	180247	50947.9	58644.4	8270.15
TS-192	BIG	36874.8	45643.3	80090.6	452980	279921	10945.2	46610.4	23567	9274.55	2382.95	11171	13633.9	2325.6	4778.5	4025.5	7030.8	10663.9	10876	4076.2	205141	8294.95	72022.9	48802.2	16349.8	42207.1	2937.15
TS-193	BIG	14560.5	11205.4	25439.6	294465	165339	4292.75	15460	14524.9	1538.75	1662	2958	4639.3	2544.55	2270.75	425.033	1911.7	6197.65	8547.6	4972.7	225853	4330.65	53658.9	48427.8	6368.75	25301.6	6663.65
TS-194	BIG	18217.2	13952.7	49882.7	297557	88230.5	3923.4	32560.5	13781.3	2839.9	1887.15	8091.65	3943.6	1858.25	2957.65	759.65	4996	8067.4	5468.05	1336.8	37563.7	3682.1	33551.6	8093.7	71705.9	28291.8	2662.6
TS-195	BIG	13886	19778.7	72286.9	302033	152017	8327.6	36038.7	25744	1922.3	4288.1	7379.1	6043.05	1844.9	3206.55	1788.45	4762.3	6044	10361	3268.3	40748.4	7682.9	66291.6	9920.4	51624.8	20921.5	2932.8
TS-196	BIG	3593.3	3039.35	7255.7	300520	64060.2	NA	4529.6	17836.2	1424.7	1190.25	1801.7	1613.2	NA	1833.9	1856.75	675.35	2329.5	2371.9	1047.3	59563.9	3529.45	22475.8	10173.4	43031	21728.5	1599.4
TS-197	BIG	5323.15	5120	17315	272628	236321	2600.45	14211	12583.7	3628.25	NA	5480.95	4893.15	NA	2958.95	752.05	1418.4	5348.4	6120	4170.35	177895	5292.15	49339.1	40314	19101.2	28998.5	2667.9
TS-198	BIG	26117.9	34614.5	46139.5	140324	35009.6	5229.95	19458.8	6178.54	4046.85	3800.75	4295.2	8095.95	2799.05	1094.75	NA	4037.15	1640.5	3728.3	2183.7	68670.3	4815.55	31105	20608.9	2839.24	12373	1865.8
TS-1	BIG	82154.3	103382	391691	389924	314973	44700.5	247306	34306.4	52408.5	20103.8	48735	42637.3	11513.4	2052.75	2543.2	29392.1	6677.35	27166.1	13381.4	82818.3	20874.7	226662	14801.2	80612.3	20794.9	3465.65
TS-2	BIG	6033.45	4421.5	16944.9	492275	121687	2135.6	11857.5	19946.6	3100.5	2138.6	3189.9	1165.8	1155.3	1139.4	732.287	1190.15	15275.9	4433.5	1280.9	247362	3694.75	25286.2	63863.7	13982.2	19905.3	3201.3
TS-3	BIG	95603	105572	623969	335841	430734	103560	429977	15473	77238.6	34358.7	80244.3	44666.4	12208.2	2956.3	1761.85	55424.1	13250.6	27452.9	16031	133867	26927.8	253052	31536.8	28321.4	38525.7	3197
TS-4	BIG	48548.3	58770.2	270114	331236	284352	46152.2	182547	22522.3	33773.4	14014.8	37412.9	21809.8	4868.55	3906.75	2270.55	18808.9	7427.45	14884.5	6408.55	257730	11302.4	106023	64864.2	24752	27110.5	4263.35
TS-5	BIG	1864.5	3496.85	9582.4	228655	28240.8	NA	3324.5	4522.49	2491.8	1421.7	1200	1159.95	NA	1588.65	NA	953.2	2791.6	3255.8	1542.45	27637.4	2177.35	22301.2	4946.45	17261.8	11827.1	2663.3
TS-6	BIG	5809.95	11033.6	35097.7	435383	120222	3090.45	19956.5	15628.9	4052.3	3073.6	6185.95	3502.4	1847.8	2504.45	782.55	711	20910.9	12771.3	5448.55	255356	8431	66932.9	47704	107244	43675	3996
TS-7	BIG	174413	208599	644164	81780	762095	95173.8	394561	14492	59281.6	17107	64267.8	51242.9	22572.3	11200.2	6327	60403.7	15764.6	24367.8	13989.3	133703	21155.7	186359	42204.3	65189.6	127361	5584.6
TS-8	BIG	40630.7	49251.6	150982	518081	287033	25681.7	106428	22082.7	16062.5	8778.5	21144.4	11844	6256.4	4570.65	NA	10693.8	8714.6	10491.4	4611.05	217537	8792.5	79500.2	37501.8	12984.4	43801.6	3197.55
TS-9	BIG	10767.8	13744.4	24624.5	394815	170996	4260.85	11829.7	11000.8	1172.9	2095.55	3801	4407.75	1613.2	4547.65	NA	711.7	5288.25	5082.45	3237.05	278582	7959.85	44177.5	57045.6	42807.9	32206.2	2142.65
TS-10	BIG	3952.55	2980.4	25636.8	599480	145020	2380.65	11178	23998	39204	1594.35	3326.4	926.2	472.85	4773.85	NA	1427.4	8512.65	9009.75	2611.15	205602	8661.05	59886.9	46669	64640	36668.1	6393.3
TS-11	BIG	25862.5	28098.3	86850.1	213857	448406	15848.8	53967.5	11674.5	11356	3199	8287.35	8181.6	1158.2	1137.75	6690.05	10432.5	6778.05	10551.2	4387.65	292768	10177	61699.2	66826.3	7081.6	39722.5	3735.5
TS-12	BIG	19213.9	27061.7	68917.4	371476	115274	11674.2	48997.8	16889.4	7628.4	2381.5	8817.5	9473.35	3697.85	4565.7	NA	6387.35	11905.8	7173.1	2560.6	217855	5849.4	42560	43356.2	17974.7	41724.8	3462.7
TS-13	CER	109743	122503	637522	328124	1.00806e+06	117245	428811	56624	83486.3	28481	81540.7	33379.3	14744.9	28041.2	5541.9	62701.5	38660.7	71049.1	38024.4	520917	53636.2	494816	129165	359414	158186	13438
TS-15	PIM	206120	242337	526235	802915	1.05443e+06	92334.1	343710	191168	65606.7	19284.1	65688.5	68102.9	21639.2	33156.4	14400.6	44962.2	48322	71543.3	43067.4	1.74203e+06	65275.5	510446	336358	299321	249141	11646.6
TS-16	PIM	183293	215695	727424	399496	240099	132426	510477	87261.1	97056.2	29934.9	102480	63160	20216.5	12055.8	8867.9	70785.1	17320.8	33546	19815.2	628540	3919	232732	172989	75431.8	86989.3	7953.85
TS-17	PIM	21727.1	34217	91571.9	436640	214891	13910	51038.8	73243	8311.9	19673.3	6772.2	8165.35	3016.8	10750.2	8431.15	6649.05	17570	12082	6564.6	736363	950	108774	115214	38448.4	112995	7181.2
TS-20	PIM	11257.6	12172.8	36179.8	193114	91478.5	3555.7	20305	39751.3	2838.8	2062.65	715.1	3797.35	NA	12521.6	4196.5	1903	19613.9	6810.6	5791.9	297547	8173	63700.1	78360.1	61056.2	55153.9	3202.45
TS-22	PIM	81365.1	105997	350713	580939	458931	51368.1	177584	102448	39474.5	15046.1	51392.9	40503.1	7930.7	21941.2	16480.5	27552.5	33477.6	45677.1	38385.3	1.63173e+06	5950.55	496903	313148	87616.8	133187	6424.75
TS-24	PIM	67007.3	70073.9	115630	429715	128890	14011.4	58179.9	66590.7	15408.4	9470.8	15911	20908.4	7879.15	22501.8	1048.95	1194.05	22783.9	19201.8	8165.8	549699	2061.7	177532	133945	117807	118060	4000.75
TS-25	CER	6338.4	12717.4	38182.9	507625	81424.4	6925.35	17130	71327.9	3820.45	4763.35	3106.2	4231.65	690.4	10069.4	2009.15	NA	30954.1	6271.85	3531.55	266121	NA	60177	53330.1	82499.9	72655.8	3975.8
TS-26	CER	20903.5	22757.6	76166.8	358806	110954	10486.4	43997.9	44275.3	8921.75	3677.45	6661.15	11701.3	1193.75	4148.6	1379.1	7828.7	7310	9283.15	5503.25	240329	472.8	107024	47176.2	14951.1	21602.1	1063.2
TS-27	CER	9575.15	4908.55	17956	733071	166157	1660	8563.75	125865	38594.7	3173	2379.9	5925.1	NA	5461.6	783.4	2505.65	12893	8647.35	3443.1	316715	9289.55	70011	93130.5	30208	32105.2	2129.25
TS-28	CER	36780.9	52570.6	140632	840354	339752	18646.7	71641.6	128378	11401.5	5651.8	21115.2	15452.9	3259.15	12269.5	2509.45	1257.1	28021.4	21278.8	9823.55	781941	21693	215243	179343	48383	89926.3	3193.15
TS-29	CER	120906	150064	489503	574617	729706	60198.4	247878	115144	46152.4	16289.6	52322.1	53943.8	16253	15371.2	6262.3	35732.2	40485.3	49980.2	23659.5	1.06758e+06	57055.7	388151	264558	37970.8	71851.1	6130.65
TS-33	CER	22861.7	22127.7	80104.1	670640	28060.7	8911.35	42581	124316	9752.85	2789.35	8118.2	9496.05	919.4	6582.3	504.459	6431.8	9410.4	1.32564e+06	713277	1.31183e+06	52440.9	9.14846e+06	372111	8613.3	13222.9	2398.1
TS-34	CER	39513.5	30734.8	86757.9	417147	233712	9031.9	43088.8	87056.9	2836.4	3814.6	1178.2	10193.1	1846.75	20019.7	NA	2995	53540	29557.7	18048.4	671444	34580	286023	184102	131806	104881	7458.25
TS-35	CER	21482.8	29307.5	35362.8	451161	159906	3567	16996.1	78703.6	13104.7	2927.85	1918.2	6491.2	1637.25	8179.5	1504.5	1917.2	39409.8	18054.7	8669.6	594818	17854.8	116090	171006	283152	99107.6	4519.65
TS-36	CER	176355	204043	418833	670900	1.33162e+06	65608.5	284223	165433	48917.4	22924.2	60584.7	68093.2	16034.5	22093.2	13603.2	2128.3	24976.2	90884.4	50586.7	1.88735e+06	75605.1	720365	444991	183710	153301	8488.45
TS-37	CER	65321.2	68500.7	359100	291804	981200	58203.9	226329	82332.1	37582.3	10467.6	58066.4	22219.3	7430.8	12381.3	4780.1	30704.9	36748.4	42718.3	23265	204932	43962.5	317419	50007.1	76337.2	61561.1	5313.7
TS-38	CER	74067.3	85378.2	57938.7	445632	239561	5719.15	27051.3	82023.3	2618.4	6882.15	4639.8	26276.4	7900.35	8884.05	1506.65	5481.2	12629.9	17637.3	6300.3	413581	11292.8	116557	88986.4	88030.4	77185.3	5332.8
TS-39	CER	201980	232304	454412	287360	351982	67761.6	274141	47739	42038.7	14511.5	57820.9	65188.2	25246.2	24710.8	15714	43479.2	45426.7	85325.6	45774.2	965768	85309	588569	199506	140185	190756	9665.4
TS-40	CER	4056.1	4804.15	34544.2	432390	234537	3203.5	16389.4	72104.5	1667.9	5229	479.15	3479.7	452.25	3294.3	1010.6	949.05	21422.8	19180.3	10571.9	786517	17137.9	116174	211826	45951.5	76296.2	5310.6
TS-42	BIG	125814	149009	484065	663814	990667	68251.3	338813	136750	60936	22800	64511.7	49347.2	13174.2	6164.35	771.6	37943	17054.2	38787	22642.3	816720	31207.4	282306	156367	55228.7	56443.4	6143.8
TS-43	BIG	28392.2	31063.9	101978	523340	420229	12833.6	61126.8	90387	11651	4060.45	10247	7911.25	5093.8	1823.95	NA	6634.5	11203.6	11747.2	6150.25	411257	1377.2	109112	73053.4	30530.9	16145.6	2394.2
TS-44	BIG	37457.7	34538.4	111297	316799	315294	20227.7	73348.6	51176	14911.1	5204.7	17969.2	13209.6	3956.15	2753.1	498.65	10882	7919.1	7617.8	5121.55	168207	8339.2	62830.2	33800.6	12095.4	27743.8	2927.05
TS-45	BIG	17074	13589	33123	230524	375566	6665.45	22054.3	50791.7	13047.5	10727.8	5028.65	2774.2	717.95	9680.75	NA	4168.75	44292.2	205284	100647	350360	180195	1.37681e+06	73108.3	56855.1	58804.4	3997.9
TS-46	BIG	51880.1	64079.4	216001	303851	344980	33290	138747	77360.5	30482.8	10597.8	31395.8	18072.7	4876.55	2046.8	1008.1	707.1	2972.5	14212.4	4583.75	69653.2	7268.6	94015.9	13533.2	19337.4	24453.1	2129.1
TS-47	BIG	91476.9	99427.5	459097	373380	445426	60861.6	246922	92691.4	48965.4	21376	53486.3	34996.8	13454.5	2511.85	4021	27593.3	15530.4	17565.9	8537	329828	13457.4	156360	63621.7	24464.3	36749.8	3732.8
TS-48	BIG	28436.3	33937.6	76578.5	625739	138088	16393.2	65702.5	144874	11636.4	2852.9	18072	13468.5	3241	2041.95	1762.15	9729.35	9635.95	9608.2	4967.65	528579	11293	91693.7	130997	32037.5	42754.1	6126.45
TS-49	BIG	52458.4	46011.2	131188	320496	214967	22607.2	86038.2	54187.9	952.4	3925.7	17560.2	19984.2	6493.5	2269	NA	13062.8	6602.6	6548.5	5706.45	119624	2311.2	69978.5	32355.2	11667.9	28498.3	3731.95
TS-51	BIG	12562.1	16692.6	36869.8	435309	137266	5953.55	27328.9	81439.6	2602.25	471.5	7363.4	6514.95	2094.75	2276.65	524.5	1155.85	6738.7	2151.6	1331.1	156709	2097.3	19879.7	43326.5	13005.5	28155	2131.2
TS-53	CER	958594	1.18618e+06	2.15551e+06	1.64077e+06	8611.55	365782	1.34803e+06	758376	290821	126308	331133	410141	163954	14153.2	57177.3	1423.5	45555.9	944827	5.59032e+06	9.41188e+06	807722	3.9067e+07	2.59513e+06	NA	523.9	NA
TS-54	CER	15134.2	13320.1	29048.5	351763	159128	3807.45	16171.1	45025.1	2618.65	2720.2	4041.8	7225.4	1618.05	2047.65	NA	2856.6	13664.5	15452.2	4385.35	564108	12452	86121.1	135839	6347.6	52999.8	3990.35
TS-55	BIG	16500.2	24118.3	72643.4	474596	212374	13074.6	49896.4	100434	9276.95	5708.55	9404.05	6752.75	4695.55	1600.3	3284.05	4865.7	7097.2	7187.7	4378.1	234913	7052.2	48362.7	66730.8	5610.4	24449	1865.7
TS-58	BIG	42082.5	58630.7	153250	708375	546643	21865.7	112221	102733	12870	6059.15	28059.2	17086.1	3003.25	3302.8	6595.1	11635.5	15062.4	12553.4	6247.85	459355	13698	108075	113852	14244.9	55576.1	8792.1
TS-59	BIG	74970.6	82931.6	334224	506187	302868	49676.3	221598	101068	39782.3	16610.3	47819.5	30248.5	6260.1	2963.45	2027.6	2794.05	9481.3	12945.8	8773.5	280377	13867	101996	53585.1	58953.8	61454.7	3472.6
TS-60	BIG	19017.2	22937.6	33735.3	285649	78368.9	3090.3	21095.8	51431.6	4522	714.95	7127.25	6735.85	3012.1	1363.5	526.84	1667.75	2316.4	4512.05	1501.2	82232	3894.4	24864	20095.1	21868.3	27757	2933.35
TS-61	CER	41558.8	36995.3	124581	660879	547152	19240.1	90169.7	130170	15175.1	3579.35	21684.6	11363.6	3453.9	9098.45	2258.95	10775.9	38925.6	15275.3	7810.7	675925	10264	110884	144118	30984.7	75907.1	4529
TS-63	CER	9675.25	5103.1	34128.6	650169	62093.9	5431.25	18453.2	124908	1666.85	2101.55	6986.8	3508.55	1846.3	5023.45	1249.3	3075.1	9404.2	5203	1060.4	379804	5906.8	44308.9	94111.3	93266.8	62286.5	6382.15
TS-64	CER	12851	23442.2	40881.2	107249	100569	7131.7	25423.7	28825.9	4039.7	2378.05	9744.65	7177.8	2781.8	2063.15	749	473.45	4155.4	27797.3	12205.6	65613.4	24317.2	185841	22120.9	18193.8	24154	3727.55
TS-66	CER	37285.1	42277.2	146882	387015	159247	27338.9	110308	68255.8	16889	5680.05	20460.5	12473.5	3451.65	3866.95	1261.45	16873.2	10842.4	36455	18669.7	317768	26512.3	219195	58419.3	25638.8	47658.1	3996.5
TS-67	CER	820975	970512	2.54552e+06	575896	3.19486e+06	474818	1.78568e+06	302654	391355	138811	382746	256709	87829.8	3660.9	10376.2	1862	10440.9	721297	380899	873570	615279	3.8786e+06	167221	2275.05	2689.05	NA
TS-68	BIG	17098.1	14260.6	36137.5	644593	79309	4976.3	24953.6	132271	1205.9	2361.9	4903.7	2424.25	694.7	5227.85	NA	3089.65	17904.8	858861	421977	873869	681774	4.22679e+06	183323	19074.8	33641.7	3460.4
TS-69	BIG	1.37695e+06	1.61858e+06	2.59483e+06	1.02944e+06	4.48784e+06	446611	1.82603e+06	573794	366779	130986	370166	466199	166803	5951.05	17265.6	626271	15935.5	1.49968e+06	824723	1.35636e+06	1.35344e+06	7.0578e+06	322563	2808.55	5895.8	NA
TS-70	CER	2197.15	5599.95	22606.8	395049	61864.5	908.1	12413.3	84072.4	6576.65	5659.15	4054.1	1616.7	457.55	10703.9	1273.55	1193.9	14550.6	8736.6	2677.2	363169	3731.15	45366.7	83621.9	35910.4	81031.5	4538.25
TS-73	BIG	26011.5	40574.6	99204.1	593304	470475	15229.4	71616.6	101512	13778	3566.3	14264.4	7193.55	3239.6	4322.2	1521	8068.45	7149.15	12869	6139.85	648534	8078.5	81419.3	117170	27241.2	66198.2	4804.3
TS-74	BIG	81066.8	94245.4	43235.2	540377	103698	2142.95	28730	99100.3	4776.95	1187.4	1551.65	18350.2	5819.2	5231.2	1007.5	3084.75	15962	12997.5	5522.9	633150	9497.55	77454.5	151534	70627.1	74252.6	4794.2
TS-75	CER	23111.8	30359.8	83270.2	671486	244639	12354.6	43261.8	108444	8561.95	3372.65	9653.35	6988.25	2308.75	2399.65	520.6	2023.5	11408.1	10574.1	7269.7	550657	10857.9	109771	171866	11442.8	54670.2	2129.9
TS-76	BIG	9459.7	12029.1	33413.6	804785	210145	2620.1	20970.5	135032	3218.1	2188.75	4745	2077.45	NA	3888.8	3293.05	1668.05	11957.5	8475.5	3766.7	385628	8341.9	66825.1	87296.1	24788	46465.3	4799.05
TS-78	BIG	62168.1	72109	287128	313576	220232	54475.2	186711	42995.9	36537.7	11159	43566	17133.6	9536.15	4572.65	2237.15	19502.5	6257.7	17067	6766.2	268884	18122.5	117151	58095.6	7149.25	26003.2	3741.75
TS-83	CER	3.89041e+06	4.31764e+06	4.93428e+06	885239	2.24624e+06	751063	2.95448e+06	235992	467215	93427.4	573744	1.29571e+06	532527	1.33146e+06	2.07367e+06	1.2556e+06	1.34746e+06	1.20545e+06	630597	1.93869e+06	1.45573e+06	697579	4.6358e+06	1261.94	6073.5	1248.65
TS-85	BIG	40898.2	59582.8	221447	283937	231027	28704.3	127976	50129.4	24092.7	10767.2	31702.3	16319.1	3455.25	13118.9	19075.3	18229.8	17249.7	18349.6	7564.15	128942	21838.3	38480	74352.3	54542.6	34395.4	4022.65
TS-86	BIG	42792.2	45829.3	52642.5	1.27501e+06	334072	5426.5	24714.5	221310	902.5	1149.15	9518.45	10883	3005.25	9517.1	15505.2	5208.52	2148.15	9329.85	4860.95	590104	13460.2	202885	31556.9	85833.6	81665.6	6580
TS-88	BIG	39835.3	49505.4	106056	1.28884e+06	725300	12387.9	69639.3	254109	9322.9	4989.44	18629.2	12189.2	5508.05	17050	19209.1	7630.35	5377.25	20224.2	9565.85	417179	28279	189497	65707.8	83530	89418.1	6773
TS-89	BIG	37392.2	29345.2	110782	838061	314901	10337.5	60454	173371	10073.9	4477.05	17344.2	9032.15	3240.55	11597.5	17123.5	7072.65	7326.1	28213.6	14696	577472	37303	253063	131986	12569	32673.7	3035.55
TS-90	BIG	73270.1	78496.1	195970	606425	199608	17478.6	110954	131771	14869.1	9269.9	20929.8	25690.4	6036.7	24696.3	31949.6	11168.4	16088.3	17850.6	5268.95	398173	20649	120036	76255	16705.3	44277.2	3745.75
TS-91	CER	4155.5	7242.05	9598.8	558452	62114.7	613.205	3039.85	122941	1174.05	1738.8	1438.45	1631.55	NA	686.15	925.3	943.1	NA	3005.5	772.8	203078	6194.65	88722.2	21119	81318.3	37986.8	5835.65
TS-92	PIM	2.25862e+06	2.63258e+06	5.25708e+06	1.04818e+06	2.30167e+06	810357	2.99885e+06	279369	531828	225343	309555	863809	380940	20551.1	41322.2	1.1144e+06	30295.2	1.20039e+06	464995	1.79006e+06	780934	6.64136e+06	334850	70624.9	289412	14923.9
TS-94	CER	26531.9	20947.1	70761.9	88491.7	107348	6971.6	42681.4	12356.8	7390.65	6698.5	14645.1	7373.8	1159.1	8309.8	9446.5	8597.7	4883.55	5308.4	1506.2	88425.9	6546.55	36675.3	24215.9	20487.4	42576.3	3502.45
TS-95	BIG	28850.7	34350.1	116273	972802	415777	12426.4	60104	236882	8216.15	3979.8	9022.15	7618.45	3225.1	8509.6	17276.2	11001.8	11259	16469.2	3003.7	498508	19775.9	157032	62727.7	42362.8	40116.4	8286.05
TS-98	CER	14782.6	12967.2	54082.4	660284	64954.1	5838.95	24272.8	107931	3773.6	424.857	3534.35	5983.45	501.6	3450.3	2747.25	3774.35	2023.6	10541.4	3536.2	596071	13483.5	293141	34256.9	16348.4	94996.6	6004.3
TS-99	CER	55968.9	46462.8	90418	1.15334e+06	222731	9340.65	48448.2	235698	3496.7	2309.2	6757.5	12898	3669.75	11742.8	16376.2	11344.5	9169.85	16401.9	8653.1	980314	21572.5	344543	82362.1	92483.6	149324	7534.75
TS-100	BIG	154670	151463	591702	635248	477514	71886.6	386272	107193	61925.7	19039.4	73094.7	36869.7	12897	50460	63985.1	44505.3	39090.4	32600	14085.9	673727	45602.7	238154	155588	22261	56178.8	7254.75
TS-201	BIG	13301.1	11790.9	35362.5	728040	166322	3493.75	27029.9	192193	4493.3	3937.2	4463.95	3682.15	1151.8	1711.8	6183.3	2314.3	952.2	18774.4	8827.15	267271	21601.4	135044	62464.2	51436.2	39976.2	6226.05
TS-203	BIG	12498	7959.3	34804.5	728545	195529	1615.7	17292.4	154071	2305.1	407.43	4314	3202.5	NA	3014.25	3438.9	3723.65	1641	10033.5	6673.3	185063	14969	77584.1	41878.6	44429.5	29040.8	3518
TS-204	BIG	58142.7	58570.9	266173	489945	249514	32969.9	173015	107160	29301.7	11775.9	31095.3	18860.2	3212.2	23279.4	31570.5	18804.8	25900.5	14360	5317.35	291607	14971.3	77450.9	66480.4	35598.2	36181.1	3276.35
TS-205	CER	3933.03	6590.05	15507.1	623971	98390.6	935.6	9096.7	143277	NA	1636.35	5554.8	380.493	690.75	1908.55	920.4	1883.15	2570.2	9793	1684.8	412583	12827.6	126798	27452.9	89743.1	59008.5	7773.3
TS-210	BIG	42689.8	49712.6	300907	268618	394726	39534.5	198880	68939.8	30390.9	14472.1	44970	20021.4	8273.6	14038.5	22581.6	24516.7	26460	17681.2	12380	206819	26006.2	67801.8	85155.6	20763.5	28577.7	4774.95
TS-211	BIG	41171	44265.1	128824	387909	186441	19449.1	78963	100995	11359.6	7506.95	15951.2	11288.1	3235.55	11272.4	19244	8000.25	6417.4	8052.35	5646.25	276852	12059	80584.5	35161.5	19648	29241.6	3502.5
TS-212	BIG	62774.1	62862.2	178236	370509	265270	20266.8	103780	94274.5	17716.5	6077.7	19587.5	18106.9	5809.95	18082.3	24496.8	14296	15168.9	14471.1	6221.1	182180	13535.9	65379.9	52695.5	27284	24397.3	2989.7
TS-215	BIG	134492	126895	857043	532294	666547	133800	579014	104832	78620.4	37004.4	97483.8	40445.2	12755.3	43706.5	64912.9	65384.6	59827.5	38660	18665.3	695673	46283.5	161990	144108	16346.9	35476.7	4289.8
TS-218	BIG	2524.35	4383.8	18160.8	419692	165913	1638.3	9750.6	121553	1618.45	200.184	3011.6	NA	NA	1845.3	NA	NA	NA	2851.4	1912.35	128235	5702.7	42019.9	12780.7	32809.7	29589	4134.6
TS-227	CER	31579.8	41303.5	152713	44206.1	223690	25817.4	83067.5	6835.17	15213.7	4753.3	21147	13052.4	3471	4342.4	17899	5980.13	6472.9	14970	7737.8	121279	21960.8	126754	36003.3	29978.8	42835.9	6655.4
TS-228	BIG	60407	70968.2	270810	75158.3	294199	40899.6	208104	15150.3	36561.4	16891	42187.8	29466.4	7190.8	4581.6	31244.2	5577.08	6230.85	17307.8	5658.8	87160.2	19962.7	139932	21168	89403.9	37316.6	1863.3
TS-231	CER	1.45999e+06	1.66137e+06	2.29956e+06	711149	2.48466e+06	392181	1.54872e+06	188884	318295	138160	302079	551878	218497	6952.25	809274	935940	22376.1	1.8347e+06	961573	1.87525e+06	1.54864e+06	8.46987e+06	345892	4678.05	3221.1	803.55
TS-235	BIG	9488.7	9682.5	26301.7	71172.5	296079	1678.5	19235.7	12974.8	4519.9	3230.9	2370	4179.35	1617.3	4327.1	5119.48	8919.65	6557.2	6469.7	5510.65	109574	6488.2	57508.8	20108.7	25730.6	42528	4793.3
TS-236	BIG	21158.8	21995.2	55741.8	42053.5	86928	8289.6	36906.8	7814.09	6902.35	3336.7	9762.35	8114.9	2533	2730.25	10349.1	3560.29	3700.15	4045.7	2200.85	63118.7	6341.15	52090.4	15890.2	26734.7	22066.2	1592.95
TS-238	CER	67411.8	60968	96331.9	784256	37651.8	13575.5	68509.2	193606	15427.2	6876.55	19959.6	19098.6	6513	13257	26600.2	23277.5	19199.4	4.53495e+06	2.34376e+06	2.85826e+06	2.92389e+06	1.88945e+07	1.03444e+06	39779.3	17181.3	4005.1
TS-239	BIG	5.01367e+06	5.8584e+06	1.61462e+06	1.33986e+06	3.73254e+06	452493	1.4976e+06	247290	131975	155529	229984	4.89285e+06	2.51834e+06	30818.2	7.22424e+06	23177.1	40188	4.03391e+06	2.06928e+06	4.3899e+06	1.94324e+06	1.62687e+07	1.02795e+06	21990.8	56341.1	4008.35
TS-240	CER	4.82762e+06	5.83619e+06	1.391e+06	897051	4.00505e+06	447885	1.53361e+06	191461	307873	161391	2365.25	5.40445e+06	2.99979e+06	38815.4	8.55001e+06	1.7162e+06	31172.8	4.33252e+06	2.33095e+06	6.20632e+06	2.66004e+06	1.73501e+07	1.45445e+06	37515.2	78661	5593.65
TS-241	BIG	24256.4	37085.8	65399.4	58896	102990	9538.6	42608.1	7804.54	5474.65	2109.05	7740.85	7883.15	5337.45	2967.75	11464.9	5105.45	6194.6	7905.75	3961.6	69811.2	6317.2	58155.2	9892.6	29811	57770.4	3477.35
TS-242	BIG	17444	14159.6	26393.7	62493	51909.1	3321.1	14586.5	8296.59	2843.05	3478.4	1683.4	5088.95	1401.8	2965.5	8088.65	8129.9	10947.4	5272.4	3330.75	211689	4490.55	40440.2	42266.8	93570.4	72189.7	6665.85
TS-243	CER	10440.6	12943.9	26658	491865	84049.9	2833.6	13714.7	12743.7	2128.25	2722.95	7543.1	4645.9	693.25	5716.85	NA	2135.35	15858.3	8956.95	5006.75	274208	8350.35	65474.4	50520.1	108623	103074	4919.55
TS-244	PIM	40933.8	57599.6	110382	499496	152863	21709.5	81653.1	15560.2	19515	24329.3	22823.2	13282.4	7442.45	11595.4	4570.05	11661.5	18934.4	46738.3	20906.1	1.06565e+06	43069.4	261649	367823	51837.5	100878	6649.55
TS-245	BIG	103606	108649	257355	461739	157833	45348	164110	22659.1	32905.2	14728.1	40452.9	30235.5	9990.9	4105.75	NA	20779.2	7002.25	19924.3	5983.6	349667	16456.6	153397	73531.2	25616.4	49057.2	4791.4
TS-246	BIG	6268.75	10471.6	21163.8	163456	62414.1	3325.85	16405.1	10794.8	2385.5	1661.55	2616.4	1635.1	1380	681.6	3928.45	947.1	1391.1	1376.6	631.25	53225.2	916.35	10033.7	12473.1	11734	16422.3	1880.65
TS-247	CER	50261.7	52555.5	61632.6	1.83897e+06	4369.4	10226.4	43585.2	163141	11897.5	7823.65	11927.1	23116.9	5576.75	3180.35	1048.8	5468.5	11546.9	3.96449e+06	1.99857e+06	2.29737e+06	196336	1.69231e+07	578894	NA	NA	NA
TS-248	CER	3976.5	5817.4	7221.6	511709	124809	1421.1	7136.85	21622.5	1182.65	2108.95	4170.2	1404.55	748.85	6631.5	1243.95	1427.1	46288.4	9970.7	5602.45	505443	10696.9	67598.6	119032	189599	90677.5	6395.65
TS-249	BIG	653541	728587	1.15887e+06	810105	2.72489e+06	179156	893060	85181.4	190699	72060.3	210391	219612	79997.3	6157.55	10132.8	144878	9649.9	440641	209402	413149	387075	2.48086e+06	98296.4	3560.9	5974.2	1066.1
TS-250	CER	14968.2	19410	44382.6	312576	135916	4490.5	20603.9	26385.4	6407	6797.65	3659.15	3474.2	2088.9	8886.85	779.55	2495.95	41510.9	11779.3	2576.6	115340	11348.2	55827.4	34416.8	213026	94685.6	5602.75
TS-252	CER	16706.3	26944	56270.8	405064	239873	5940.6	43141.9	23182.2	8329.9	2609.45	5226.8	6240.3	3266.15	4097.55	1752.4	1201.8	9647.6	16097.6	4865.7	405290	8481.9	77959.2	76954.6	68691.2	74142.3	5063.6
TS-253	BIG	12609.6	14212.5	31520.8	377544	99195.8	2130.2	19361.3	16222.1	2841.2	951.75	7158.5	4621.65	1396.8	2613.6	1007	2857.65	7477.45	9832.1	3979.4	272500	7147.5	59266.3	57611	16493.5	49044	4255.45
TS-254	CER	15695	19016.4	28705.4	165795	54313.5	1436.2	13800.8	8904.05	1887.7	4997.75	12806.6	5105.95	1383.6	7749.25	NA	715.5	8095.05	5339.45	2688.6	132048	4389.15	20513.1	25042.2	54036.4	70924.1	5871.25
TS-255	BIG	31818	44691.5	100694	289907	227966	16574.2	76917.4	25966.2	12077.9	4259.9	15644.2	10447	6042.35	3653.25	1010.8	474.4	9161.55	14705	7196.25	269769	13603.5	129855	50040	15405.2	35232.1	3210.5
TS-256	BIG	2.13643e+06	2.4275e+06	2.51503e+06	1.24716e+06	2.26805e+06	463053	1.89497e+06	178990	318020	154034	329937	1053615	425181	7179.6	46088.8	1.21632e+06	17296.8	1.05558e+06	578084	1.62231e+06	847620	4.99132e+06	292852	4308.4	5367.2	1074.45
TS-258	CER	14885.7	26566.6	70242.3	423581	471106	9032.8	40233.2	19746.2	12397.8	3793.85	13319.2	6489.2	2332.85	5919.5	NA	7853	18557.4	13125.9	8155.45	402461	13957.2	104606	94298.2	80559	70857.7	8273.2
TS-259	BIG	70818.4	77970.1	312110	262351	221053	49185.7	190251	17661.3	38955.6	14592.8	48307.9	21106	9762.85	NA	2263.2	1178.8	3010.9	8939.35	5483.85	184794	11440	86825.8	33704.7	4317.8	17759.3	2665.3
TS-261	BIG	65318.2	75686.3	160919	893862	2.04942e+06	30652.7	110590	49588.6	20879.2	10004.6	25214.8	18601.5	7426.55	4326.7	1045.5	14506.2	24741.2	70311.1	37903.7	1.30182e+06	71672.9	487539	312411	32092.7	89378.1	4793.75
TS-262	CER	73273.5	85721.7	193315	392009	364684	34235.1	128536	25372	20662	10332.2	34560.6	25534.5	8326.45	9094.45	1018	16660.1	44867	25956	9251.15	348231	25955.6	212036	86257.9	305942	126654	7939.4
TS-263	BIG	10562	20756	60887.4	227921	144854	7246.85	41833.7	15019.9	8297.1	3319.65	12605.4	4870.3	2332.75	1143.7	1008.15	3808.6	2095.65	4150.65	2200.55	116797	9809.25	32931.9	24766	9174.35	13383	3735.3
TS-264	BIG	4435.3	3168.45	14626	912507	126607	1302.15	10199	42367.5	1188.75	1123.6	6834.25	926.7	708	5117.9	NA	1353.35	22386	7794.35	7317.55	189030	6673.95	53953	37576.1	82669.5	41734.6	3992.7
TS-268	BIG	41252.6	51876.1	184119	368555	294023	27563.1	126249	17764.5	21153.2	4739.25	19614.7	18555	4273.05	2507.3	783.95	12824	7707.45	9638.85	7280.9	183849	9540.65	87517.9	37001.5	22014.5	33733.2	4797.65
TS-269	BIG	3016.3	3482.6	7091	189214	43554.5	2372.25	3425.75	14549.2	2360.2	1184.9	1173.9	932.35	NA	1010	498.45	949.75	3681.75	4387	1091.7	40304.9	1841.34	16779.5	11719.7	21742	23534.3	2399.55
TS-270	BIG	8090.55	4643.15	18536.8	190928	46348.8	2846	8691.75	13231.3	2617.1	3863.35	3101.7	1615.2	NA	940.2	NA	828.1	2555.85	4758.7	435.95	53724.5	2339.9	22374.1	12246.5	33386.8	28613	2661.85
TS-271	CER	59224.8	62333.2	304770	838909	750579	47044.7	206162	66030.1	46342.7	9523.05	34519.5	19956	8574.5	5234.75	2275.35	17563.2	17373.3	39604.7	16304.8	334731	36379.6	283033	89050.7	156816	70885.3	8271.5
TS-272	BIG	22300.5	24915.2	75395.4	198523	144187	10226.7	45827.3	8780.22	10943	3448.9	10228	9484	2068.15	1610.45	499.1	5932.15	4368.3	7442.3	2139.8	58986.2	7436.3	49419.6	17244.1	30266.7	21508	2405.35
TS-275	BIG	25528.3	30163.3	39537.9	263928	218683	7122.55	23811.6	16242.5	4746.7	1133.9	6650.35	10471.4	1381.5	1149.55	782.4	2373.6	4633.8	10689.5	2148.6	222632	8179.05	60348	38858.5	3300.5	28096.2	3735.3
TS-276	BIG	21492.1	29804.3	127063	339047	559507	16624	80763.9	22450.4	16600.2	4296.3	16401.5	7147.95	3931	1369.6	1557.65	9273.05	5335.5	21007.6	9824.6	42436.3	17366.8	145904	8589.7	82847.8	20172.5	2930.6
TS-278	BIG	39454.2	45653.2	34862.7	444595	89911.4	5096.45	20327.4	22630.3	3332.65	2934.3	8230.85	14166.9	3914.4	2280.2	1008.05	1902.4	3946.7	7691.55	2828.5	134975	5742.35	40887.8	28689.5	40204.6	43014.3	3997.75
TS-280	CER	7263	7730.85	12340.2	300726	122166	727.2	3986.85	26265.7	1897.15	2487.2	1362.5	2666.6	1403.95	6495.95	NA	716	27254.1	5673.75	4231.4	121813	4637.05	38697.8	32074.5	82229.3	75308.6	2937.9
TS-283	CER	1370.8	4636.35	9979.4	346234	84814	2618.35	8104.85	64887.4	33963.4	2826	2991.05	2785.95	499.9	6161.55	935.2	471.6	17296.6	8398.3	3455.95	356655	8442.6	60896.7	74370.3	42189.7	46447.6	6673.7
TS-284	CER	46667.6	73188.6	116675	324481	132024	21403.5	65058.7	58374.6	14980.2	4279.75	1648.15	20094	8114.35	2497.35	501.45	11428	9291.35	9270.75	6661.8	139317	10447.4	82801.9	34250.8	35830.9	29050.4	2132.3
TS-285	BIG	20533.5	23728.7	38260.5	256265	100253	8317.3	30830.2	94227.4	7351.75	1458.1	7709.4	8657.5	1389.05	2728.75	1510.95	708.3	6139.85	7167.2	3923.25	223192	7648.45	45002.5	51565.3	11140.2	29290.5	5340.2
TS-286	CER	1.00352e+06	1.26098e+06	2.47388e+06	788519	3.95475e+06	474308	1.93559e+06	475072	445390	130258	347439	381458	131026	3307.35	525.5	646769	9219.55	1.22239e+06	695335	1.3592e+06	1.0798e+06	6.23827e+06	285760	5348.35	812.85	537.75
TS-288	BIG	25007.5	28947.2	135605	315233	193404	22576.7	79612.8	39404.8	15563.6	4391.6	14870.6	13180.9	1616.95	2054.35	500.2	716.1	4382.4	12226.8	5232	140971	12925.9	74157.8	25037.6	13965	17734.6	3208.05
TS-290	CER	8982.3	9558.45	21845.7	499696	107363	1892.5	14500.4	73427.9	1188.6	2494.05	7120.6	3707.3	1153.45	4329.3	NA	1192.05	32027.1	5345.25	2098.5	213601	6223.8	46952.7	34167.2	70650.4	45472.7	3997.1
TS-292	BIG	29002.3	23444.4	72473.6	361796	171361	13027.4	54645.9	76866	12835.1	5693.4	13092.5	11845.7	5121.75	2626.05	1516.6	6182.9	7428.7	6011.5	3505	112633	4633.85	44099.2	28656.8	18103	19703.1	2413.45
TS-294	CER	70602.2	62777.2	58786	495920	283163	7583.9	52535.7	105888	7276	4759.3	12634	25083.8	6487.35	9341.35	5048.65	7850.3	20324.3	9713.75	6160.95	332868	8970.9	77642.8	71964.2	69540	86132.4	3728.65
TS-296	BIG	10178.5	7232.55	23783.5	331186	95618.7	5947.8	10791.4	68448.2	2615.8	2265.8	7394.1	3454.8	1390.65	2276.6	639.358	2389.75	6889.25	4177.9	3072.3	137739	4179.5	33706.5	24244.2	17848	20957.1	2403
TS-297	BIG	3242.1	3932.9	11638.9	299840	65985.3	1900	9251.7	48494.2	951.85	1811.3	2265.45	2324.7	694.65	1604.25	NA	1675.65	8966.2	2765.65	NA	87184.8	2810.6	19543.5	18525.5	46548.4	19858.8	3472.45
TS-298	CER	908585	963380	1.93264e+06	368024	1.55284e+06	361261	1.40391e+06	115258	301543	102780	316134	315397	94278.2	4778.7	7325.6	307710	19423.4	526785	303130	1.08783e+06	508817	3.35021e+06	256311	3038.95	12859.1	3466.55
TS-299	CER	79952.5	97089.2	157491	420149	712616	26418.9	122182	91481.4	26819.3	11634.3	30929.5	21115.8	6352.95	15012.7	5057.35	16415.8	40957.2	42758.7	24659.3	1.3008e+06	39597.5	327426	273886	83568.8	130348	3058.2
TS-300	CER	52715.1	70657.4	125927	550935	90813.6	24272.2	74813.2	314995	942.9	5950.4	21210.4	25063.1	4870.55	8891.65	1042.7	2790	12728.8	1.80626e+06	903005	1.38773e+06	1.59665e+06	8.9592e+06	377839	151569	45484.2	3198.25
TS-301	CER	13609.2	28591.3	51248.4	393577	157767	9961.7	30150.5	101612	1180.5	3195.65	6891.45	6394.55	3951.75	9009.6	1278.75	4519.15	42367.3	18868.5	9879.75	499933	16457.7	135087	155030	140965	131610	6645.1
TS-302	CER	1.47502e+06	1.66445e+06	2.66828e+06	382867	1.98551e+06	435933	1.89603e+06	395520	336255	144269	398961	553785	196570	9020.65	25792.8	602597	15324.7	810366	387074	1.11246e+06	689055	4.2439e+06	297129	7626.4	1606.35	798.45
TS-303	CER	108734	121846	401355	204194	840822	62709.4	240114	56620.4	40928.8	18268	49895.6	32305.8	8846	9552.8	8606.55	706.2	48106.7	41908.6	21559.1	660960	31268.3	254494	154793	125695	108132	7200.65
TS-400	BIG	95973.6	118183	178873	143200	190190	22003.7	93148	14201.5	23671.5	11604.2	21318.6	29303.6	9776.55	NA	NA	10426.9	2538.85	8531.1	3553.25	39172.8	5561.5	53422.6	9111.1	18780.2	14811.9	2406.15
TS-401	BIG	3257.55	9667	21644.2	127841	114603	4520.85	19921.7	38797.5	4980.7	1344.3	4525.2	3262.1	1392.1	2279.1	1263.05	3325.9	4756.15	4553.35	2823.75	92757.5	3072.3	34818.4	18792.8	6375.85	14808.2	2406.6
TS-419	PIM	2102.35	7029.25	14930.2	186487	77712.7	2602.25	8761.3	38723.1	2849.55	1655.15	3076.95	923	928.7	2294.95	1631.95	7580.95	5986.9	3438.3	3080.65	51388.8	3072.85	28183.2	11709.6	39416	15835.4	2134.55
TS-425	PIM	6386.95	17534.5	45652.9	113212	83781.8	4983.5	30423.5	23158.6	6419.6	918.4	9278.55	4422.1	1871.85	9115.95	1012.4	477.2	46028.9	21776.5	10639.4	63842.4	17679	144868	14219.1	161966	85420.9	4509.65
TS-430	CER	63804.5	70535.9	140171	322989	208429	28519	100736	75457.3	21627.2	11152.9	28169	24561	6062.5	10016.4	NA	1394.55	22824.5	14713.5	7703.9	631349	13822.6	117784	134103	57055.8	99307.8	8690.2
TS-450	CER	3250.45	1612.45	5083.36	425566	93088.7	2372.35	7052.85	76056.4	715.95	5469.55	6225.05	1052.55	469	9229.55	741.95	2889.35	19469.9	5287.5	3476.05	393627	708.6	43804.9	93707	43530.8	53463.6	5865.65
TS-501	BIG	7924	9067	11909.1	279019	88542	3095.75	12348.6	50159.3	11353.8	2126.85	5463.2	1382.15	1156.65	4099.4	497.15	1592.95	13783	5638.5	848.1	122971	3473.9	24932.9	33605.4	18374.2	52097.6	4272.35
TS-503	BIG	10661.8	15236.1	17578.8	133452	68154.8	1906.15	14025.2	22715.2	832.7	1430.1	681.2	3734.25	1162.15	2732.8	4880.65	2144.95	2856.7	3863.2	1390.9	89193.7	1525.65	23514.7	16424.1	6633.22	23255.5	3480.2
TS-505	BIG	13837.3	18106.1	40716.3	480462	396009	4742.75	23542.9	135792	2597.65	6345.7	6296.25	4782.7	942.9	18448.2	1042.95	677.25	33173.8	27114.2	13338	568921	25917.2	184190	118060	95691.6	56842.9	4521.65
TS-506	CER	39917.4	37853.7	103588	402178	282090	23084.2	81251.8	56887.8	1687.4	5026.25	17619.6	14574.6	6289.5	5916.85	780.55	9997.9	11356.4	16976.7	9003.5	384700	18224.5	118841	98734.4	11205.9	60777.4	5064.7
TS-507	BIG	38349.6	52171.8	76343.6	213487	238472	8332.65	64806.7	34628.8	12373.5	5242.2	10588.1	14182	6784.7	2500	2517.75	6431.4	6367	12162.9	7716.95	210961	10758.1	56001.9	34760.7	8886.55	39191.4	2684.85
TS-508	CER	11638.7	11914.8	18530.4	283682	208497	3333.45	20232.9	73728	5222.7	3439.8	6190.1	4231.35	NA	2505.3	1769.35	685.2	8982.9	5385.5	3287.65	209322	8107.55	46940.9	40438.4	9728	24473.8	3733.35
TS-509	BIG	7729.7	7666.15	27098.5	329283	53826.8	1190.45	14039.9	52000.9	953.85	5224.35	10247.9	3246.8	1849.5	4113.95	NA	2633.7	11373.9	4933.05	1538.5	188419	3477.5	32417.8	58634.7	109430	37724.4	6075.6
TS-510	BIG	25275.2	24239.4	66158.2	236772	128468	11529.2	51524.5	60836.4	10948.1	3301.55	11656	8350.4	3959	2509.6	NA	5480.8	3474.65	5436.9	5671.6	172166	6345.75	42947.9	44095.6	8662.4	32251.4	1594.25
TS-511	BIG	1608.6	7677.65	21212.5	115405	41541.4	2615.1	19487.5	29434.6	2138.35	1663	2149.9	1423.3	1168.75	690	4423	2848.1	1587.85	3779.7	1103.1	88986.5	5230.5	22703	22978.7	2564.6	11035.4	1597.2
TS-512	BIG	27644.2	37978.5	36425	249185	122352	5243.45	28269.5	52337.6	4739.6	3042.8	8080.7	11580	4638.3	3180.1	784.5	2130.5	6447.7	3630.5	2606	36238.5	2964.65	32315.7	10705	106266	45047.6	2930.9
TS-513	BIG	2775.1	3576.55	9293.15	160641	13701.9	2847.05	4533.1	29851.5	10433.5	670.45	1427.6	2318.7	462.75	470.2	NA	1160.15	2520.85	1940.25	432.8	191578	2185.5	12832.4	38640	1273.55	16706.5	2129.8
TS-514	BIG	3037.3	7243.9	15441	185376	72560.1	2379.65	8564.75	37628.1	949.45	1592.9	1192.9	2556.45	NA	2173.85	2089.3	1907.7	4850.85	3032.55	NA	79482.4	3934.3	20874.7	11455.1	33403.1	22751.3	2407.25
TS-515	BIG	10226.8	10332.4	27779.7	394392	320249	5239.2	18209	71705.7	1182.35	3856.45	4153.6	6542.35	1386	3188.9	1009	479.4	8952.05	10725.6	4205.45	388839	9241	71707.6	85557.9	20095.9	39158.7	4008.8
TS-516	BIG	5450.65	7773	12818	229630	142613	2850.45	7736.3	39645.3	957.15	1188.6	3101.4	1617.05	NA	909	3507.4	716.25	1955	5971.5	2397.8	244521	5001.85	42174.2	37542.3	2560.1	16861.5	2673.4
TS-517	BIG	8404.85	4871.95	14452.9	120329	117024	1413.95	10477.3	30202	950.8	461.4	1667.1	2123.65	699.7	1597.15	757.05	475.4	5092.45	4863.15	1082	123238	2854.4	31773.4	32569.4	3572.35	16933.1	NA
TS-518	BIG	10686	11394.1	23296.2	160498	63888	2374.3	13344.1	23250.7	2613.7	2144.3	2371.5	3495.05	NA	1591.55	NA	1428.5	2093.7	1369.65	2183.2	88519.1	5387.9	21537.1	21418.7	7135.6	19103.8	536.8
TS-519	BIG	8438.7	3965.35	13720.4	274752	159778	3328.2	12858.8	45097.8	1418.8	1378.5	3104.35	NA	NA	1815.85	514.8	481.5	8518.85	3456.35	2389.85	264986	925.55	31345.9	53754.7	15012.7	29004.7	5326.35
TS-520	BIG	29938.4	27400.1	89212.6	480953	301462	14056.6	59370.4	115931	12385.5	2928.55	21891.3	9768.35	4198.1	2517.1	1003.1	10803.8	9358.3	32640.9	13620.7	89013.1	29415.8	217465	17121.8	81619.4	18754.2	4264.2
TS-522	BIG	13163	7187.6	25587	428950	127814	2381.35	14022.4	129106	831.9	1361.05	1774.95	3239.65	NA	3061	1499.3	678.9	5311.1	4956.75	1953.7	133645	5913.15	46479.6	32589	32835.3	64203.2	5600
TS-524	BIG	32276.3	25325.1	45194.1	486102	247902	8765.9	32176.4	129163	3572.95	3565.25	2038.1	7687.5	2334.3	2739.2	NA	3082.8	10197.1	7439.5	1567.35	89149.6	4202.65	56629.1	24525	78065.5	94640.1	5341.6
TS-525	BIG	17200.8	16875.8	33570.9	542512	133646	3431.15	16855.2	150493	3330.75	5698.75	1430.7	1954.5	1155.6	3873.2	1540.05	4059.65	8525	7773.95	2390.5	87179.6	5205.3	50621.7	20058.5	52377	90341.3	8286.2
TS-528	CER	13220.7	16719	22173	775803	274914	3336.9	16378.8	188147	3096.3	1798.8	7727.75	3793.6	748.65	6606.7	1245.65	5226.15	34408.3	11455.8	4366.3	440411	11595.5	116505	80291	123822	120344	11995.8
TS-529	BIG	7621	11041.8	22773.9	379929	251242	4279.9	16852.7	92171	1897.15	4971.95	1539	1187.25	NA	2290.55	772.9	1653.65	5724.85	7884.35	1939.95	67821.1	4573.5	53288.6	12508.9	43195.2	39816.3	5601.7
TS-530	BIG	4789.55	8191.75	11867	715630	149310	2371.4	3378.62	152218	945.2	1770.6	3824.15	NA	1211.05	9328.05	NA	947.45	10918.1	9900.9	1781.55	204270	7035.15	69461.2	39387.6	103292	193934	6932.35
TS-531	BIG	8160.85	13606.9	13989.5	595579	190422	2140.7	10217.8	161685	718.25	1900.15	1436.5	1385.75	708.15	3646.8	755.2	2132.9	15174.9	16245.4	6866.35	100012	5705.95	118607	18502.5	116421	69885.1	8289.95
TS-532	CER	17483.2	27278.2	85879.7	330264	296938	12385	46566.7	82918.1	7849.4	2630.6	6433.1	7380.85	3937.35	4103.6	501.55	8820.1	8832.35	8615.7	4935.15	238067	2126.5	127051	43733.8	31184	120684	3466.4
TS-533	BIG	18871.1	28632.7	60747.9	654434	171444	7145.15	37902.7	122613	4406.3	2708.1	3118.5	9294.8	2307.1	6131.45	780.55	1192.95	19560.3	9980.95	3290.3	280116	8941.65	78750.6	69596.2	85342.9	133177	6406.6
TS-534	BIG	27250.3	25264.9	48190.9	476751	168313	4149.75	22735.2	111115	2607.95	2260.55	2270	12541.4	4444.05	1595	791.05	961.2	8404.8	5296.45	1935.7	80048.2	1306.2	44442.9	15111.5	20791.7	52070.4	4521.85
TS-537	CER	58228.1	66473.5	136888	833144	816089	15124.5	87611.6	213569	13727.6	2485	11378.4	21790.5	9988.55	18007.5	4853.8	10884.5	51170.1	38256.8	12383	1.44245e+06	31106	392083	274125	45836.9	488938	14552.4
TS-538	BIG	25464.7	36450.7	81467.7	552638	119825	6505.4	23669.7	111647	5417.45	2703.7	6064.8	16276.8	1388.2	3431.1	1505.1	3788.85	5621.6	10356.8	3674.2	196333	8039.75	70984.4	47132.1	22024	72582.6	4260.4
TS-539	BIG	77426.7	87070	139041	437989	228120	12379.5	64818.7	113198	7123.85	2606.5	5593.45	21373.7	10244.6	1937.3	NA	6530.25	6102	4892.6	2765.25	143660	6459.35	70863	21114.1	52838.9	71124.7	5064.2
TS-540	BIG	18700.2	23783.6	52963.4	458713	111654	7359.55	26286.7	121418	722.85	3074.05	2716.7	7645.15	2315.35	2512.65	NA	3323.55	8119.45	2358.65	2173.6	60962.2	3080.2	39723.4	13044	80807.7	50560.3	6123.65
TS-542	BIG	33743.2	35709	51083.9	587918	216863	6178.4	22339.2	138051	2859.9	1663.7	2143.1	5480.95	1155.6	4560.95	743.15	5467.8	11014.4	7036.65	4494.1	151826	1353.2	69332.8	35445.8	34483.2	65195.4	3735.75
TS-543	BIG	43650.3	45693.6	174294	739715	347494	31125	107158	176363	16818.2	4755.75	9542.6	14126.9	3584.9	1368	760.05	18059.7	7476.25	23903.5	8195.65	231738	17346.7	214932	52592.3	16021.6	211241	5863.5
TS-544	BIG	61584.2	75558.6	168187	529893	196870	19156.8	93734.5	142655	14660.3	2705.15	5932.1	22829.9	7758.05	7424.55	2001.4	9231.45	17261.5	13586	4887.6	130583	9192.6	111736	25456.2	63301.1	85478.4	6672.9
TS-545	CER	29008.2	26110.2	57195.4	610509	98102.6	9523.4	33302.4	150784	2359.7	4177.1	3941.65	8114.9	1854.5	3414.6	NA	1195.7	18993.5	22929.9	7342.2	210208	18752.5	222295	45404.7	250791	108547	10395.4
TS-546	BIG	16763.3	19687.8	66842	562062	278285	8512.35	45895.3	167311	7119.6	3771.2	475.7	7931.9	3368.85	5159.25	749.35	3093.15	18710.8	11843.4	3485.9	124164	7679.15	89602.4	25752.1	102980	88831.6	6400.25
TS-547	BIG	21149.2	25176.8	46462.8	591076	312088	5224.3	27825.8	170253	4986.5	3827.65	476.1	6271	3266.6	7524.15	13671.6	711.55	15115.5	9766.05	3918.8	108502	8335	98749.5	24476	119385	111420	6129.95
TS-548	BIG	9285.8	9826.4	37805.2	476164	130963	2605.85	18926.9	110275	2846.2	4243.2	945.1	2785.35	462.55	3436.65	4890.4	2125.5	6082.75	11213.4	3447.45	93079.4	5045.75	69368.7	17167.3	37707.7	57159.6	7194.05
TS-554	BIG	9714.4	14550.3	36547	426839	135163	5629.7	21594.5	87987.9	3771.25	1932.7	3051.75	2073.5	2990.85	2930.34	5550.46	2590.25	2115.95	4694.35	2058.65	313531	4792.6	88344.9	13508.5	10341.9	20505.5	752.5
TS-555	BIG	81088.3	89084.3	385281	548942	436039	55135.1	253110	128530	40204.4	12884.6	44064.6	23591	7587.4	30869.5	53329.1	32005.5	30323.8	28173.8	12358.4	442091	31295	171653	125036	38168.2	49269.2	6284.35
TS-556	BIG	13879.5	17970.5	49376.8	798378	98318.9	7216	30417.3	140302	3265	943.2	6727.8	5878.2	464.6	3461.85	7384.3	3550.98	2560	7337.85	4867.95	353429	9050.9	117925	31561	12229.4	31933.1	5298.7
TS-557	BIG	27382.4	31271.6	91354.1	465299	259424	11560.5	55883.2	140972	9699.35	3064.2	8035.1	9705.25	3684.65	13126.9	16818.3	7202.25	8660.7	9573.65	6195.1	222292	15683.2	77619.3	65973.6	35810.4	27996	3767.55
TS-558	BIG	16002.5	15253.2	50125.6	406354	85614.5	3391.45	32620.3	109038	3932.45	1399	2340.9	5807.5	NA	4854.15	7600.75	3381.2	1868.45	1596.85	3421.8	293768	3976.2	90603.5	14465.1	6537.75	26567.5	3247.3
TS-560	CER	12747.4	9203	22035.4	915501	168744	4393.29	14154.5	146066	1186.4	1874.4	2950.2	2530.6	NA	1154.35	2527.5	2589.4	1855.1	5977.55	4114.95	683205	12385.6	224564	26453.1	39368.6	79538.1	5781.25
TS-561	BIG	31466.4	23586.2	76701.8	643776	239590	9569.1	48624.7	155345	7175.05	4171.85	3966	9906.85	1382.25	7836.5	14076.2	6171.6	5934.6	14051.1	6334.2	556210	19180.5	142989	53609.1	18384.1	41967	4809.45
TS-564	CER	6131.8	6492.05	21050.2	155891	73373.2	1433.4	7245.35	46181.2	11433.8	4584.55	5358.3	3544.3	1798.25	6327.6	3098.5	12571.8	10821.6	9665.85	4840.4	440077	11898	83361.2	114768	47653.4	41210.6	4544.1
TS-565	BIG	15866.5	16970.5	17004.7	89690.7	65624.4	3769.45	4969.9	21331.3	7119.8	1849.5	1416.4	2677.55	968.2	1183.15	4329.05	3187.75	4221.4	2314.05	2301.4	111623	2085.05	21013	23165.3	17247.8	26463.4	2145
TS-566	BIG	13765	15662.1	29463.8	83379.2	89720.9	5168.8	12810.2	16271.3	718.15	3559	718.15	3619.05	2253.2	3584.3	5515.1	4108.25	5722.5	6003.4	1855.6	117676	5762	42612.9	20619.9	32056.8	28525.2	3513.25
TS-567	BIG	20913.1	20922.3	66137.6	117227	125970	8947.95	30647.2	18956.8	4979.25	1943.2	947.3	5750.2	2181.95	5154.4	5929.2	10635.1	10735.9	12386.1	8310.3	448281	12859.4	64139.9	76889.8	9123.9	53818.2	5633.85
TS-568	BIG	93195	99390	356589	149041	407076	48995.9	212098	40422.7	27547.2	14295.6	4039.05	19140.8	10020.9	9893.1	28871.8	10635	10289.8	36672.4	21376.7	885631	30501.2	271425	145537	11648.3	62589.7	8046.3
TS-570	BIG	35352.7	33380.5	131965	82058.8	189149	16561.6	75203.7	6651.13	13248.7	4459.35	9220.3	8300.6	4043.55	1578.45	19052.1	2868.66	3662.95	8023.75	3410.2	128003	8706.2	38151.9	33507.5	22546	26125	2134.6
TS-572	BIG	11112.5	10494.5	27012.7	41882	106542	1884.45	9686.05	70683.1	7921.5	1901.9	1777.35	2382.7	1413.4	1350.5	3547.05	2519.15	3418.05	4793.2	2294.15	92503.5	4353.5	20587.7	17884.5	18991.1	28840.7	2143.05
TS-574	BIG	23743.5	28871	95377.6	140196	156620	14189.9	57478.8	23587.3	4772.15	4478.85	1888.3	7587	2854.6	3136.45	12788.2	10509	7313.2	7071.15	3421.65	244603	7919.95	63636.5	53475.6	13232.8	38322.6	4559.75
TS-575	BIG	15722.9	13940.6	43651.3	88031.2	63502.7	5904.2	30763.3	19492.9	3332.7	4865.5	3772.6	4719.3	1585.5	1789.2	6648.5	7407.5	5337.85	7334.9	4800	320732	6157.6	60471.2	55686.6	16747.6	25344.3	4283.5
TS-576	BIG	45764.5	37443.8	120954	112753	208459	19456.9	75238.7	23465	473.9	3407.2	714.95	12580.4	4300.35	3152.05	15887.6	3758.28	2604.2	9890.1	7146.15	139258	12420.2	90496.9	27646.7	28881.8	27884	2960.7
TS-577	BIG	191363	214923	1.11769e+06	208555	994431	138728	555912	30329.2	75551.5	35254.6	85651.4	65718.8	13203.8	8077.5	78016.6	12350.1	25753.2	72048.1	28285	457105	51921.1	432753	112249	85114.7	76133.1	6423.1
TS-578	BIG	17076.1	9392	41124.9	142556	84621.7	2374.4	19199.3	26303.9	12921.8	3337.75	2852.25	3331.25	902.5	3916.45	6230.95	7297.95	5815.85	8436.6	2288.5	275359	7832.2	57094.8	55045.9	26487.8	35998.4	4552.7
TS-579	BIG	4108.5	5783.25	34050.8	54944.3	54803.7	3063.6	12336.3	75327.7	1198	2129.85	1416	3117.9	1613.65	2026.05	3549.65	4567.65	4791.65	2993.7	918.7	97350.4	4807.5	30739.5	26445.9	14202.8	18617	1880.5
TS-580	BIG	29719.8	11126.5	49874.5	98236.1	200344	5840.75	25385.6	25186.7	477.1	1569	472.5	6703.6	1427.4	2454.8	8364.75	2837.4	3880	11180.3	4333.2	286416	8689.85	73991.4	76108.9	14425.3	37828	3758.1
TS-582	CER	35813.8	53416.6	182405	184651	267404	25238.4	116015	54566	16221.2	5725.5	1309.45	16483.3	3603.15	4687.35	18819.7	18700.6	11187.1	20274.8	10996.5	363633	19385.8	184490	81774.4	80209.8	44271.7	4814.15
TS-583	BIG	20017.1	18221.1	50186.3	100056	137026	4725.3	35400.4	18903.2	2838.7	3127.55	4506.6	8099.15	2128.45	2127.9	8040.6	9478	5949.7	8033.65	3427.25	257789	6690.95	42399.1	51779	26586	33550.1	4552.8
TS-584	BIG	22392.6	27443.7	78361	69843.3	126287	9408.6	51112.8	15965.9	6624	1600.95	3538.75	6635.3	3357.95	1121.7	15257.2	5038.12	1167.85	5966.45	4136.1	163416	7348.55	49481.3	24335.6	17503.4	26103.2	2685
TS-585	CER	22966	22773.2	93652.8	86984.2	281523	15371.1	67315.6	14117.6	2381	3215.1	3780.75	6248.25	2134.65	4032.6	11829.5	13857.9	8241	33170.9	14162.9	184196	23305.2	236577	20574.8	61148	32248.5	2941.25
TS-586	BIG	83947	101432	257484	134935	287925	34975.2	144383	30781	6440.2	11802.1	4116.25	26230.5	9236	6028.45	36262.9	5808.78	17059	25528.1	8200.35	391777	15513.2	154201	87644.4	34988.7	49637.4	4022.6
TS-587	BIG	96366.9	114063	293741	188504	594971	47956.4	218735	152073	8169.85	15560.7	24335.5	33514	9822.25	3373.95	43263.2	12318.1	9712.4	16769.3	9608.1	430011	15961.2	177295	71946.5	27620.8	75392.6	4562.15
TS-588	BIG	30670.2	36772.5	67108.7	55744.7	222842	9904.2	27426.8	19927.2	718.15	3484.55	2354.1	8885	2827.05	3604.9	9331.95	7331.6	13715.6	5755.7	4866.65	54952	3715.6	54618.4	9249.9	56195.9	36119.2	4558.2
TS-589	BIG	11246	9353.8	35142.6	148093	156595	4708.2	21592	19687.4	4049.15	1880	2831.05	5295.4	2136	3038	7390.75	6406.25	5016.5	8031.95	3239.2	129560	4603.3	47766.5	32195.3	34566.6	44318.2	4582.45
TS-590	CER	25559.2	39399.8	65922.1	89683.8	279394	8398.5	41283.5	26875.2	4740.85	3746.15	2812.05	7830.5	3719.95	3596.4	13527.9	16043.5	12344	17321.9	8975.1	452034	19953.2	163526	88206	30246.5	45321.9	5074.5
TS-591	BIG	18133.9	14654	35043.3	65931.4	257370	5918.95	21325	21402.5	1166.4	4010.2	709.65	2737.2	1176.35	946.2	5915.75	955.951	2733.15	11877.2	2964.65	124561	12117.7	90831.1	26014.3	4234.9	11495.5	2934.45
TS-593	BIG	9210.25	13890.6	33185.8	100347	107395	5672.3	17676.7	27804	3780.25	6982.25	5066.25	2250	1173.3	3599.5	4485.9	7980.4	11964.1	4384	1162.45	101969	5997.9	51900.2	26728.7	59662.1	46792.2	5090.5
TS-594	CER	17267.3	27223.3	58086.9	181852	318880	7694	46092.3	139332	3804.1	3951.3	13478.6	8994.25	4484.8	14057.9	6367.1	24924.1	69883.9	24685.8	14509.3	1.19069e+06	25338.2	217261	257313	42891.8	96292.4	7193.3
TS-595	BIG	41185.3	46633.5	56739.2	123057	221783	8016.45	37217.5	25431.9	5800.87	3493	943.6	11182.5	3583.35	2250.3	19091	6509.65	10362.2	13185	4400.7	230323	13847.2	108288	45750.9	18251.5	35921.8	4548.8
TS-596	BIG	7282.1	6446.6	12198	107712	85034.1	NA	6535.85	25446.1	12908.3	2498.4	3293.2	2411.8	890.8	3346.1	1936.3	4461.95	5640.2	5936.55	2999.85	164311	3208.3	44999.8	33578.1	22735.4	43065.1	2673.8
TS-597	BIG	39043.4	42470.8	132651	130054	607821	15373	64944.2	23044.7	11787.6	2827.9	1179	9958.35	3592.35	5631.3	14020.4	9945.4	9839.05	19027.3	9248	246772	14771	137633	65487.4	23028	53602.2	5363.8
TS-598	CER	34552.8	39464.8	142574	88589.8	216101	22456.5	89056.7	17210.9	14126.4	4733.1	3958.3	10492.5	4287.5	6503.65	19145.2	10269.9	14011.6	10603.6	2780.8	169589	8785.2	75419.1	41544.9	46862.7	36172.8	6989.8
TS-600	BIG	8259.5	9795.55	17250.7	89555.8	162556	2589.15	9235.85	61328.1	14168.5	1836.9	942.8	1457.5	670.4	2235.2	1940.9	5254.2	1832.4	5313.7	2766	58044.6	3456.4	26784.8	15418.8	25053.8	24581.2	4299.25
TS-602	BIG	177186	197017	735857	203977	509216	98736.8	442764	37538.4	1444.5	22527.9	4688.5	56471.5	21226.8	4940.45	76193.4	13503.7	38697.3	48124.1	17233.3	326698	24866.5	298901	105056	30885.7	91561.6	2411.4
TS-604	BIG	2298.2	5705.35	11364.3	154847	54123.6	2379.1	7127.1	5365.25	2126.5	1144.9	955.5	NA	NA	912	497.05	944.1	2515.9	3310.2	659	59173.2	1599.8	11166	15619.4	7645.7	16615.2	1600.35
TS-605	BIG	34709.8	34590.1	70829.3	164212	286464	13487.5	54913	5876.1	2619.6	4746.25	12327.4	9453.65	4384.2	2748.35	998.45	8060.2	4469.8	5845.9	3244.15	48011.5	4148	39611.9	11721.5	12675.7	23241.3	1861.55
TS-606	BIG	20734.1	31725.7	43174.6	268805	474274	8908.8	37936.1	6656.78	8072.15	3812.2	12383.6	9049.7	1852.7	5045.55	2504.6	7130.6	7634.35	12297.2	3926.35	346217	8485.45	70741.6	69325.9	5335.95	36364.5	4005.9
TS-607	BIG	6752.45	7104.8	22466.7	216601	88274.3	2122.1	10911.2	4236.1	1185.1	1356.4	451.3	4181.65	922.2	2518.15	878	674.55	2535	1974.05	912.25	178870	1813.3	18146.8	31291.2	5342.35	33108.2	2929.25
TS-609	BIG	83558	80944.9	173685	864071	3072.6	30426	152106	78730	24539.6	9006.5	23557.9	22828.8	9517.7	1595.5	2261.9	17145.2	6238.1	1.98085e+06	995408	1.12092e+06	1.66012e+06	9.47754e+06	299429	NA	538.2	NA
TS-610	CER	11995.6	11491.9	23836.8	330692	214098	1180.65	9446.6	14771.6	3075.3	2731.95	4637.5	5582.1	1864	3651	NA	1660.7	17668.3	6108.25	1960.1	120978	7328.55	43434.2	23869.3	65216.8	40332.7	4802.5
TS-611	BIG	2224.65	5372.6	27086	661924	335035	1889.45	6512.35	20430	1181.15	2703.05	4533.4	1615.4	903.25	3436.7	3041.75	672.35	8570.9	8139.2	2581.05	278471	6090.55	54656.3	72012.4	10706.9	32229.3	5060.1
TS-612	BIG	14949.9	24394.7	69598.9	400806	673432	9033.3	41783.8	17678.3	3792.85	3808.2	12142.8	7625.6	2086.6	4318.2	3286.75	4286.1	5317	26147.8	10661.2	325392	17200.9	146320	92053.7	14792.8	43581.4	3202.85
TS-613	BIG	39539.4	45067.2	38457.2	187618	99528.7	3811.5	24414.5	3691.78	4976.75	NA	3183.45	14818.9	5817.15	NA	1752.25	2140.8	1736.05	4613.1	1753.25	85967.7	6833.85	25040.7	18780.3	3305.1	18092.8	1867.6
TS-614	CER	22249.2	30133.5	103513	467912	239521	21592	75765.7	10844.8	12130.9	5714.85	18335.9	8345.95	1727	3755.5	2002.25	1188.2	28345	16767.5	8274.35	486014	16866.9	119336	118835	57018.7	62466.7	6893.4
TS-615	CER	14655.7	13588.6	32590.8	378322	161667	3336	26795.3	15158.4	5468.35	3566.55	9555.5	3943.6	1617.7	1594	2018.9	3331.8	15187.1	4082.7	3987.35	161365	6299.05	39152.9	39062.2	63659.7	63531	3996.15
TS-616	BIG	6389.8	5310.15	25599.3	471558	121293	2607.05	13068.7	11685.8	470.9	3865.95	3099.3	2760.45	NA	5861.15	1265.15	1440.7	17225	6283	5229.05	227619	5015.2	42320.4	49227.7	61437.6	66779.4	3197.25
TS-617	BIG	52554.9	53511.1	156533	534760	502926	26865.5	116802	17985.8	19013.7	11646.7	22457.8	28490.9	8347	4088.3	1748.55	11894.4	8355.45	16284.9	5673.85	350104	8740.4	92382.7	65128.8	12728.2	37302.9	3994.95
TS-619	BIG	158434	194477	581587	345213	432896	103220	400397	18788.3	68486.6	28170.9	81202.4	58685.7	23547.1	4813.7	2499.8	55658.7	12845.6	31361	15652.3	301663	22630.9	240174	83138	29756.1	53416.2	4006.35
TS-621	BIG	7373.95	6893.55	12552.5	245669	140105	3811.85	10714.8	8441.13	NA	NA	2143.9	1619.45	895.8	4091.3	NA	673.65	6235.4	4851.9	1941.45	300159	5746.55	37864.5	66360.8	6052.9	31096.5	3193.9
TS-622	BIG	6733.55	5752.45	24382	260663	50935.8	1903.35	9533	13701	NA	1387.25	1553.8	2312.9	3261.1	NA	750.25	1193.45	2535.95	1707.7	1310.65	71684.5	2644.45	20372.5	17968.5	14178.7	27146.8	4012.95
TS-624	BIG	65510.1	64856.9	108023	289659	111255	16054	56972.3	9925.12	7799.85	5932.4	13503.4	16755.1	5816.2	1145.5	NA	7096.15	5061.6	10256	3900	123622	6428.5	61572.7	33305.2	23969.2	32028	3192.4
TS-625	BIG	22247.3	26412.3	57544	432114	278032	8812	40456.9	17718.6	4290.6	4371.05	11441.5	8503.8	2774.25	4790.5	2255.2	4886.35	11732.3	10519.8	5437.15	394583	8103.25	85368.4	76885.7	19678	51094.9	4260.2
TS-628	CER	138976	150294	416964	707461	484363	67445.9	287200	24809.8	53866.7	21884.4	53287.4	38621.4	13740.5	10011.4	10654.1	29893.8	31471.7	37897.2	16874	1.16036e+06	26733.2	268630	261587	45275.2	131238	5068.15
TS-629	BIG	11087.1	10930.1	50356	894426	196754	8802.2	34825.2	32544.3	5932.85	2617.15	5614.45	4171.7	928.35	7741.3	4030.2	4978	41714.7	17500	8747.45	1.06637e+06	15631	114686	220645	41516.6	91546.9	5852.05
TS-630	BIG	56234	55130.4	92474.5	250458	99768.3	9483.4	47051.4	6409.57	8792.2	4752.35	8363.9	11886.5	3494.8	1138.95	81.2147	4290.9	4032.2	4239.85	2451.25	89903	4139.3	25872.9	19526.7	15749	27668	2933.15
TS-631	BIG	76394.8	73759	286393	565420	422549	46282.9	182029	126469	40599.9	6898.65	19491.8	22251.5	13718.9	2051	59955	27067.5	9171.2	29522.8	16317.2	226226	21737.5	222624	53391.1	30995	114439	7721.15
TS-632	BIG	29016.2	36096.5	134875	234328	155433	21300.4	94201.1	10002.7	13037.6	5912.35	21077	9752.6	4435.55	2964.7	1509.4	13027.8	2348.2	5677.1	3528	127183	4605.6	44784.4	28949.4	8343.1	25916	2132.5
TS-633	BIG	99464.9	112105	386899	518756	695724	52076.2	243430	29938.8	49335.7	21608.7	59242	29860.4	11100.2	6164.55	6820.5	30239.5	8592.55	22672.4	11005.9	442105	16467.3	176049	99355.7	23939.8	40841.9	3994.4
TS-634	BIG	54906.8	59833	224683	328911	213570	32327.9	167081	18737.5	30686.2	8995.4	33335.2	21580	6954.1	4578.75	NA	18792.4	7862.05	8457.15	3913.2	188935	8742.4	68623.6	44790.3	24889.2	29802.2	5870.95
TS-635	BIG	22594.6	31916.3	78541.8	243616	225870	16410.2	65639.2	19775	8538.9	2138.45	11423	9497.1	2795.85	831.55	501.4	5006	2560.85	6563.8	3745.9	145145	7707.75	36511.9	33642.6	7408.5	22050.7	1338.7
TS-636	BIG	58020.4	65359.4	112660	606351	300995	13515.8	64273.6	156632	6405.45	4030.7	8339.2	28164.5	7443.4	3187.1	3537.65	9039.05	13836.6	10651.9	3947.8	253156	4168.15	91684.5	51786.2	45387	122509	6688.9
TS-637	BIG	55492.8	76777.7	176295	608761	409028	32417.3	145612	35971.1	25564.2	8491.9	21583.8	18114.7	6275.7	2048	NA	16322.2	7338.55	14475.4	7590.4	236988	15805	114283	56521.1	54429.2	40781.1	4263.7
TS-640	BIG	12925.1	19251.6	52455.1	458602	176745	6664.5	30656.9	18510.5	7368.95	2844.45	8457.15	8854.1	2076.6	2507.9	1767.35	3565.05	4412	5308.7	5325.6	286552	7813.9	51821.8	69732.8	13562.4	46031.7	3482.6
TS-641	BIG	38932.6	39374.2	119114	335095	294326	13532.6	63846.6	16708.9	9717.1	5109.75	9276.35	8330.9	2786.7	1147.45	1497.85	7606.15	5813.95	9713.45	3045.75	281476	6336.9	56054.5	46168.1	20336.4	33088.3	2668.7
TS-642	BIG	8518.25	11692.5	8080.4	355638	41864.3	1423.3	5712.25	15444.2	2289.3	786.85	3094.4	3714.45	NA	2284.8	501.55	954.7	2086.65	5058.85	1293.2	192070	3305.45	42256.2	40377.9	18200.2	23409.1	2671.8
TS-644	BIG	10270.7	6576.9	19861.7	334432	208236	3327.75	11518.4	14568.2	20534.8	NA	2040.15	1978.45	459.75	1142.5	515.65	467.9	2209.1	6991.45	3076.65	142934	3955.45	46001.9	39299.2	4088.55	20981.7	NA
TS-648	BIG	288119	317394	714860	605206	574770	111666	547938	149049	68028.3	18205	45166.1	98459.2	44486.2	5715.6	2529.2	49185.5	9595.2	24864.8	8338.5	125000	18807.8	232509	23486.8	44635.4	90518.2	8009.6
TS-649	BIG	18984.3	23612.5	34616.4	354811	58720.3	5230.75	20655.8	97408.2	2243.6	2850	1429.65	6220.2	3035.45	5436.85	NA	2631.55	7566.3	20949.2	7556.95	82808.7	19923.2	176494	12995.6	71803.9	52840.9	6151.3
TS-651	CER	48032.5	48069.5	117810	525459	530643	19657.8	80493.4	124260	9003.35	14705.7	24916.4	9072.8	9083.85	8361.9	NA	12555.8	20230.1	14209.1	3950.45	209421	8771.05	144447	43211.7	189151	185440	7870.1
TS-652	CER	2818	3376.05	41187.5	827947	103566	1178.3	23040.1	207645	22382.9	8587.4	21013	1874.2	1422.25	15809.7	NA	3111.25	28069	13803.7	5507.45	267839	8736.65	108590	60948.4	257040	132472	10126.5
TS-653	BIG	40951.9	51592	172728	499704	341706	28192.9	103918	96737.3	12948.4	5943.15	11465.4	21142.3	9041.75	6338.05	204440	13796.5	8119.3	11751.9	5334.35	133660	9801.7	110370	22575.1	69488.3	86245.8	5328.75
TS-654	BIG	51187	55997.9	143228	762043	568139	16735.8	81044.4	187692	11320.5	5617.1	9032.65	22537.3	6465.2	7975	1511.9	10955.8	31343.3	31096.1	12168	397236	19721.5	231994	82078.2	134174	103380	10138.5
TS-655	BIG	24197.8	26241.9	69145.3	394893	326404	8316.95	29482.8	100967	3083.7	2862.75	2141.5	9740.05	3732.2	5497.6	1249.35	3325.85	7355.35	16838.9	5691.75	188763	8516.7	113057	53891.5	17830.8	49715.2	3997.3
TS-656	BIG	73868.9	73924.6	162612	677986	682149	22105.7	93817.5	171581	12010.6	3614.75	5456.2	25058.3	12581.3	9789.4	3022.6	10446.6	10613	16134.9	5449.2	227344	12532	136432	47401.7	80201.4	146380	8030.55
TS-657	CER	132957	174691	516143	869840	874948	72224.5	302644	209211	40959.7	18707.9	27491.2	54758.3	25049	18108.7	2345.6	1180.75	31181.4	80084.2	28600.1	1.50716e+06	50413.6	645451	337291	32758.4	340293	15761.8
TS-664	BIG	13047.8	13288.2	29181.5	666023	255259	7810.05	25723.7	144588	4252	2649.6	7811.95	3707.05	2096	8012.75	NA	3081.1	26120	13675.5	4455.5	232781	8458.85	90494.5	49064.6	120429	155350	8527.2
TS-666	BIG	22289.5	34084	64934.9	521808	253824	6271.3	37762.4	90597	4248.4	7232.05	2735.35	11172.6	7203.45	5262.45	785.15	2594.85	24635.7	21290.4	5270.25	398384	13359	145857	76745.8	103192	169074	5599.15
TS-667	BIG	100129	101228	271894	483701	482357	37592.2	167981	133835	20199.3	5252.3	15004.6	28638.5	14182.1	3188.7	1131.55	19983.9	3800.1	13134	4594.9	106768	11958.6	124713	30774.3	40552.3	87545.3	5870.1
TS-669	BIG	10474	13667.6	49625.7	756587	107585	4507.1	18335.5	174402	2381.65	4319.7	2377.1	4382.45	1853.1	2262.2	NA	477.4	12742.7	8617	4125.35	354386	4598.25	74476.5	50777.5	23761.2	83132.2	5616.05
TS-670	BIG	12529.7	15536	61448.2	728239	731520	8074.95	30186	103107	6665.3	1624.9	6915.5	5805.8	3004.1	4557.05	2006.6	4995.15	9126.5	8022	4708.1	307265	8156.75	85939	83822	45288.7	84339.6	6143.3
TS-681	BIG	17540.4	24664.4	71700.6	562568	230628	7962.6	40642	111228	3574.8	3350.8	4525.4	6011.4	1498.15	3416.6	1504.5	6199.05	3438.95	7034.25	2650.2	235158	5523.3	57213.2	39609.4	23975.8	97882.9	7474.85
TS-683	BIG	169427	176891	148422	708149	844300	23283.1	90762.7	181293	21847.2	3581.4	14994.1	74899.1	23027.9	6143.1	5805.05	712.15	19344	19214	7808.3	529304	14011.8	160027	94105.3	34599.7	176341	5848.6
TS-684	BIG	26692	31008.7	94263.7	455466	190467	10270	52609	111830	3563.25	1788.95	5714.5	10650.4	2081.3	3185.4	NA	9517.1	6255.45	6593.85	1293.7	76977.7	5410.75	58881.2	19838.6	41781.1	62714.9	4247.25
TS-687	BIG	19719.1	23721.5	86757.1	550123	285031	13421.9	65454.3	108335	1649.8	2847.7	9268.1	11561.3	3022.25	2501.65	3311.5	935.7	3928.6	6536.5	5011.25	253085	6107.9	84925.8	40328.9	25033.8	101858	7477.05
TS-691	BIG	13284.9	19824.5	53442.9	650810	273684	6428.3	30930.5	135901	7103.05	676.2	944.9	8585.8	NA	5230.5	3152.9	5731	11310.5	7572.1	4749.95	282871	4382.95	52616.2	52584.8	27934.7	87271	5075.55
TS-697	BIG	138041	149832	711090	766932	926055	98974.9	403109	214987	83616.2	18088.5	43708.6	64051.8	21835	6246.9	7952.4	52218.3	17628.4	32672.2	13524.2	272199	36158.1	367755	64387.3	94213	150572	7459.9
TS-700	BIG	3.47235e+06	4.20135e+06	5.78005e+06	4.27145e+06	6.38723e+06	953641	3.34726e+06	1.1436e+06	239969	277882	279402	2.03757e+06	849555	31168.8	120514	2318.7	62569.2	3.66821e+06	1.7563e+06	4.71362e+06	553800	1.76384e+07	763300	11987	8035.3	3483.2
TS-701	PIM	138267	148226	558407	350824	694385	80505	284874	86546.7	2362.6	8568.95	29487	56951.1	17622	25968.8	13929.5	45774.3	58700.2	46228.1	10485.9	510928	22018.7	331381	123743	389832	547342	21910.5
TS-739	BIG	18624.9	22306.2	86081.1	289771	170267	10929	48648.1	76491.6	8578.15	2706.15	476.2	11792	2428.6	1137.75	1558.75	716.1	4604.65	7417.95	3055.65	136375	5402.8	73509.9	29712.8	16600.8	65243.6	2137.3
