# Supplementary material for: Multi-Omics Analysis Reveals That SlERF.D6 Synergistically Regulates SGAs and Fruit Development
Source: Front Plant Sci. 2022 Apr 8;13:860577. doi: 10.3389/fpls.2022.860577 (PMC9024245; doi:10.3389/fpls.2022.860577)
Supplement: Supplementary file 8 [file Table_7.XLSX]

## Sheet: Supplemental Table 7
Supplemental Table 7. Summary of PCR and qRT-PCR primers used in this study.
Name	Primers_ID	Forward primer	Reverse Primer	Notes
Solyc04g071770	SlERF.D6	ATGTGCATATTAAAGGTGGCGAATC	TTAGCTAGAAGAAGGTGGATAGTGGC	for the gene 1359 bp in gateway vectors
Solyc01g056940	SlUBI	GCCAAAGAAGATCAAGCACA	TCAGCATTAGGGCACTCCTT	for tomato Ubiquitin 3, 114bp in RT-qPCR
Solyc04g071770	SlERF.D6	AATGTCTGCAGCATCAACGC	TGCTGATTCTGATGCTGCTG	for tomato ERF063, 102bp in RT-qPCR
Solyc07g043410	SlGAME2	AACTTCATCGCAAGCCCTTC	ATGCAGTTTGGGTTGAGCTC	tomato GAME2, 110bp in RT-qPCR
Solyc10g085230	SlGAME5	AGCGATCAACCGTTCTTGTG	TCAAAACCATCAGGCAGTGC	for tomato GAME5, 83bp in RT-qPCR
Solyc12g006470	SlGAME12	TGGGACAATGTTTGGCTGTG	ACAAGCACAGCACCAATTGG	for tomato GAME12, 106bp in RT-qPCR
Solyc07g043500	SlGAME18	TGATGCGGAGGTTGAAGTTG	AACTTTTGCCTGCCCTGTTC	for tomato GAME18, 127bp in RT-qPCR
Solyc07g043410	SlGAME2-pro	TAGGTTAGATAGGTGCCCTAACGC	TTTCACTACATTTGAACTTGTTCCTTC	for GAME2 promoter 1500bp in gateway vectors
Solyc10g085230	SlGAME5-pro	GGATCTAATTTCATGTAGCAGTATG	CTTTTGATTTCTTAAATTTCTGTTTC	for GAME5 promoter 1500bp in gateway vectors
Solyc12g006470	SlGAME12-pro	TAAATATTTTGTACATTTGTGCAATGAG	TCCTTGAAGCTTTTTTGAAAAATTATAG	for GAME12 promoter 2000bp in gateway vectors
Solyc07g043500	SlGAME18-pro	TCATAGTTTGTTTGCTTTGAGTATG	CACTTGTGTCTCTGTATTTTTTTCTC	for GAME18 promoter 1500bp in gateway vectors
Solyc04g071770	SlERF.D6	CACAACAAGATTAGCCATATCAAC	ACTCCCAATGATGAAGCTAGTAAC	for the gene 300 bp in VIGS
Solyc04g071770	SlERF.D6	CAATTAATGTCTGCAGCATCAAC	AGAAGTTGCTAATGAAGAAGATGAC	for the gene 300 bp in VIGS
