# Supplementary material for: Multi-Omics Analysis Reveals That SlERF.D6 Synergistically Regulates SGAs and Fruit Development
Source: Front Plant Sci. 2022 Apr 8;13:860577. doi: 10.3389/fpls.2022.860577 (PMC9024245; doi:10.3389/fpls.2022.860577)
Supplement: Supplementary file 9 [file Table_8.XLSX]

## Sheet: Supplementary Table 8
Supplementary Table 8. qRT-PCR data of transient expression fruits.
	EV		E8: SlERF.D6-1		E8: SlERF.D6-2		E8: SlERF.D6-3
	SlUBI	target gene	SlUBI	target gene	SlUBI	target gene	SlUBI	target gene
GAME12	22.5981	30.5782	21.0736	27.2628	21.0808	27.6992	20.597	27.0133
GAME12	22.5997	30.1441	21.136	27.4594	21.1168	27.6994	20.5595	27.0179
GAME12	21.7282	30.6441	21.3918	27.1893	21.2903	27.5436	20.7031	26.8987
GAME12	20.5154	31.8825	22.0265	31.2438	21.1548	30.689
GAME12	20.57	31.7269	21.1835	30.8354	21.041	30.719
GAME12	20.6009	31.3226	22.1546	31.2993	21.3999	30.7647
GAME18	20.4857	31.2469	21.1965	30.5261	20.6427	31.1716	21.3135	31.3829
GAME18	20.3447	31.2639	20.5411	30.3599	21.4125	31.2946	21.1243	31.1613
GAME18	20.3827	30.9966	21.4744	30.1874	21.6297	31.0214	21.2436	31.5547
GAME18	20.5154	31.8825	22.0265	31.2438	21.1548	30.689
GAME18	20.57	31.7269	21.1835	30.8354	21.041	30.719
GAME18	20.6009	31.3226	22.1546	31.2993	21.3999	30.7647
GAME2	20.4857	30.6783	21.1965	30.939	20.6427	31.4287	21.3135	31.7117
GAME2	20.3447	31.2979	20.5411	30.2638	21.4125	31.7641	21.1243	31.8112
GAME2	20.3827	31.3512	21.4744	31.0188	21.6297	31.3269	21.2436	31.7449
GAME2	20.5154	31.3903	22.0265	31.4162	21.1548	31.5628
GAME2	20.57	31.2616	21.1835	31.2745	21.041	31.4901
GAME2	20.6009	30.9629	22.1546	31.5229	21.3999	31.656
GAME5	20.4857	20.3809	21.1965	19.0851	20.6427	19.5151	21.3135	20.213
GAME5	20.3447	20.4786	20.5411	19.63	21.4125	19.7346	21.1243	20.1194
GAME5	20.3827	20.2199	21.4744	19.2715	21.6297	19.6493	21.2436	20.1785
GAME5	20.5154	20.0103	22.0265	19.4874	21.1548	19.2801
GAME5	20.57	20.5176	21.1835	19.854	21.041	19.4273
GAME5	20.6009	20.4318	22.1546	20.0454	21.3999	19.7026
SlERF.D6	20.4857	26.0095	21.1965	25.2257	20.6427	25.921	21.3135	26.072
SlERF.D6	20.3447	26.0531	20.5411	25.0412	21.4125	25.8958	21.1243	26.2139
SlERF.D6	20.3827	25.99	21.4744	25.1021	21.6297	25.7203	21.2436	26.1932
SlERF.D6	20.5154	25.9935	22.0265	25.7406	21.1548	25.4732
SlERF.D6	20.57	26.143	21.1835	25.8561	21.041	25.8829
SlERF.D6	20.6009	26.0988	22.1546	26.0199	21.3999	25.6235
	EV		TRV2: SlERF.D6-1		TRV2: SlERF.D6-2		TRV2: SlERF.D6-3
	SlUBI	target gene	SlUBI	target gene	SlUBI	target gene	SlUBI	target gene
GAME12	22.5981	30.5782	21.0736	27.2628	21.0808	27.6992	20.597	27.0133
GAME12	22.5997	30.1441	21.136	27.4594	21.1168	27.6994	20.5595	27.0179
GAME12	21.7282	30.6441	21.3918	27.1893	21.2903	27.5436	20.7031	26.8987
GAME18	22.5981	30.5251	21.0736	30.526	21.0808	31.4174	20.597	30.0809
GAME18	22.5997	30.2238	21.136	30.6307	21.1168	30.7168	20.5595	30.2763
GAME18	21.7282	30.265	21.3918	30.6909	21.2903	30.5178	20.7031	30.474
GAME2	22.5981	31.4805	21.0736	32.6229	21.0808	35.0064	20.597	32.2153
GAME2	22.5997	32.4781	21.136	34.5329	21.1168	37.0008	20.5595	35.6367
GAME2	21.7282	31.8879	21.3918	31.7882	21.2903	32.6259	20.7031	33.6203
GAME5	22.5981	20.8112	21.0736	22.5244	21.0808	22.3202	20.597	21.8971
GAME5	22.5997	20.8796	21.136	22.6239	21.1168	22.3922	20.5595	21.8821
GAME5	21.7282	20.963	21.3918	22.6787	21.2903	22.5214	20.7031	21.5855
SlERF.D6	22.5981	29.4373	21.0736	30.1286	21.0808	29.7136	20.597	29.1928
SlERF.D6	22.5997	29.1944	21.136	30.6813	21.1168	30.2613	20.5595	28.7203
SlERF.D6	21.7282	29.1734	21.3918	31.1243	21.2903	29.3672	20.7031	29.3701
